# Supplementary material for: GI-16 lineage (624/I or Q1), there and back again: The history of one of the major threats for poultry farming of our era
Source: PubMed Central journal article supplement (PMC6301571; doi:10.1371/journal.pone.0203513), 2018-12-20

4

● F  
● X

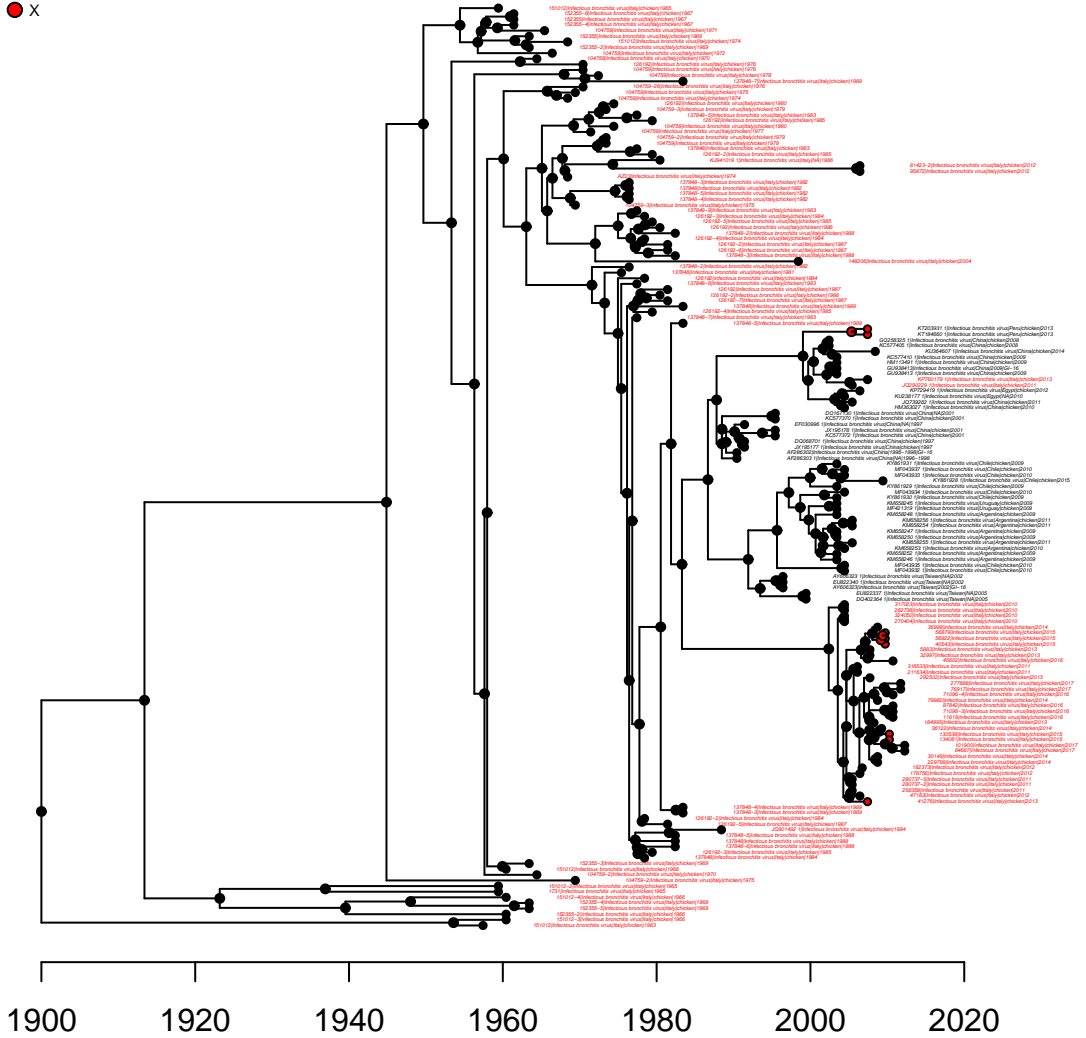

● L  
● S  
● X

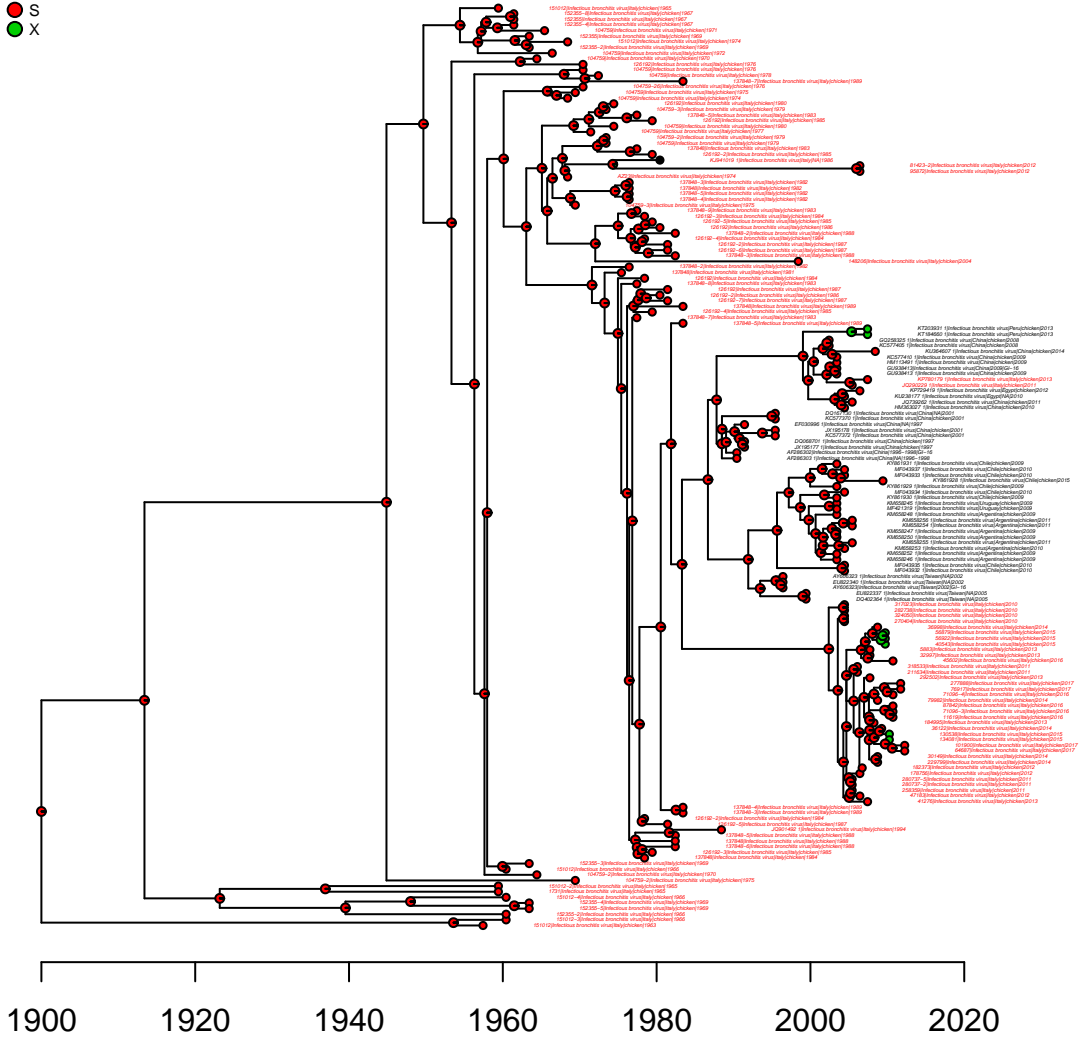

● D  
● R  
● N  
● X

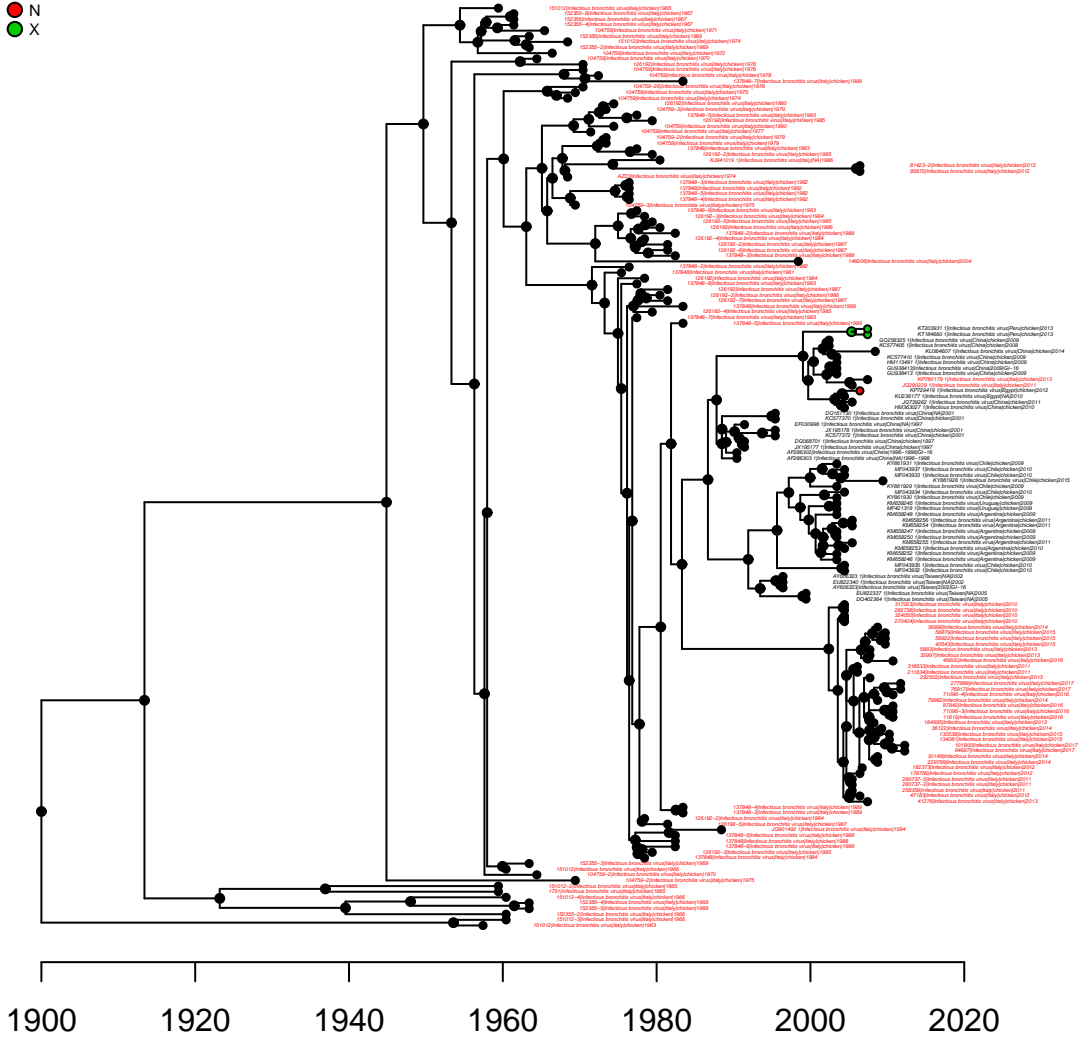

● G  
● X

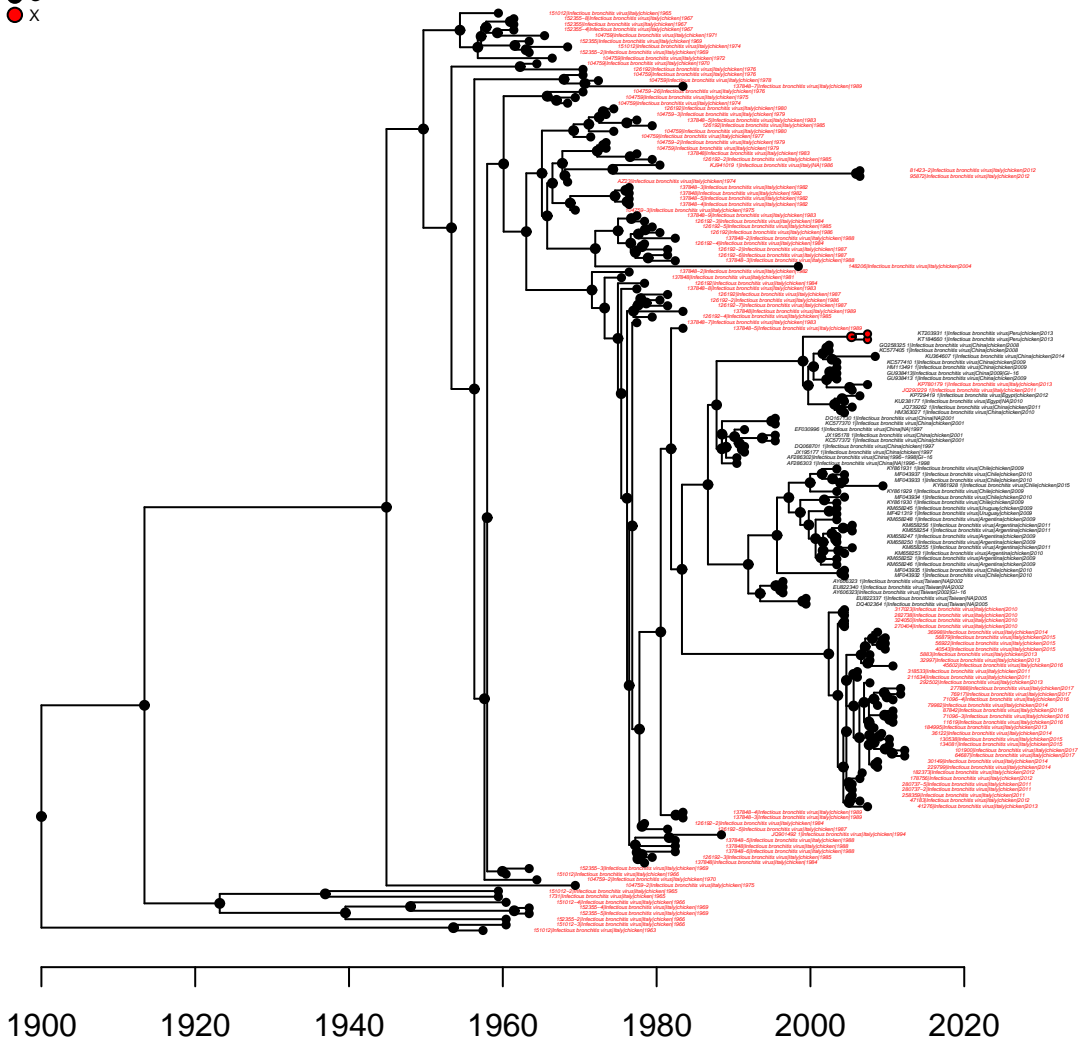

● F  
● R  
● L  
● X

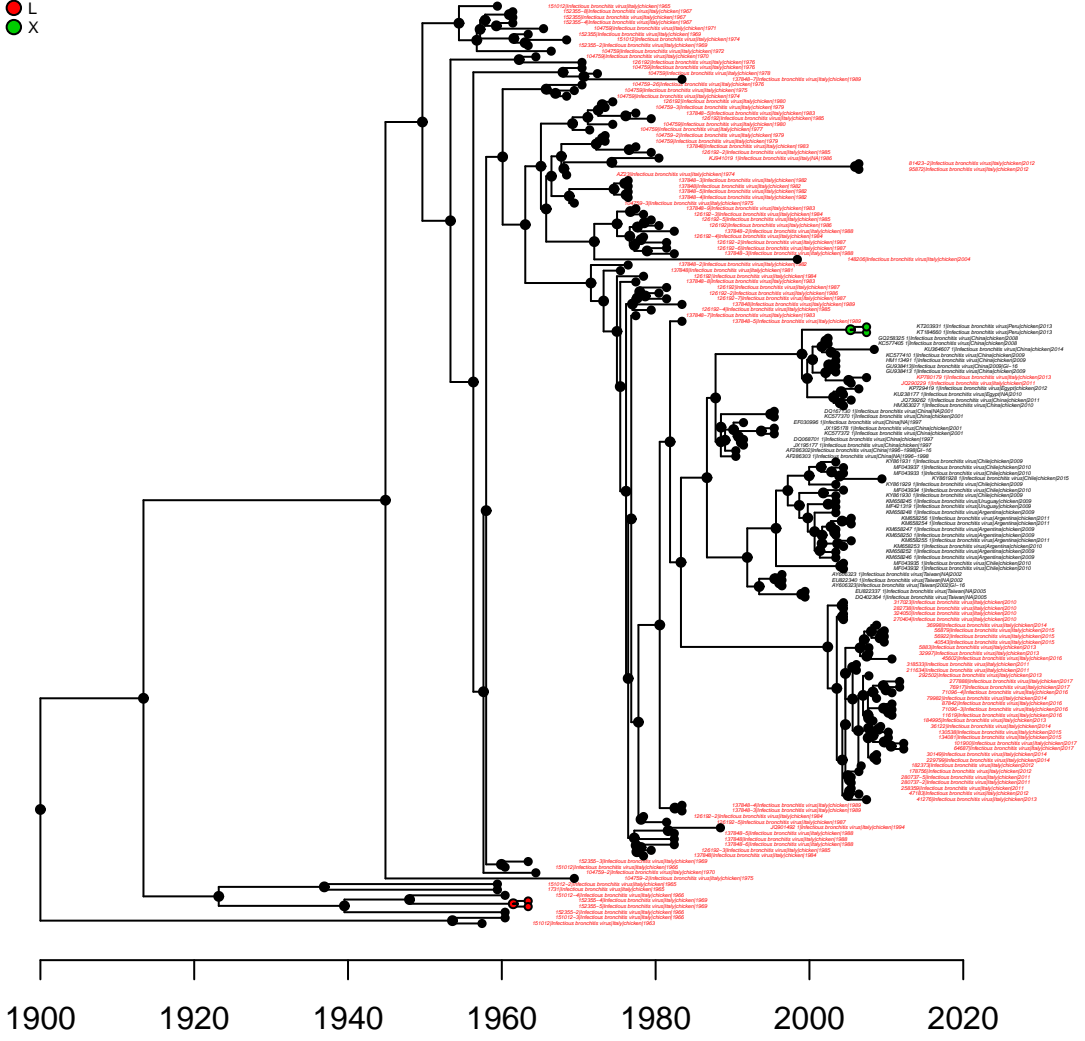





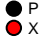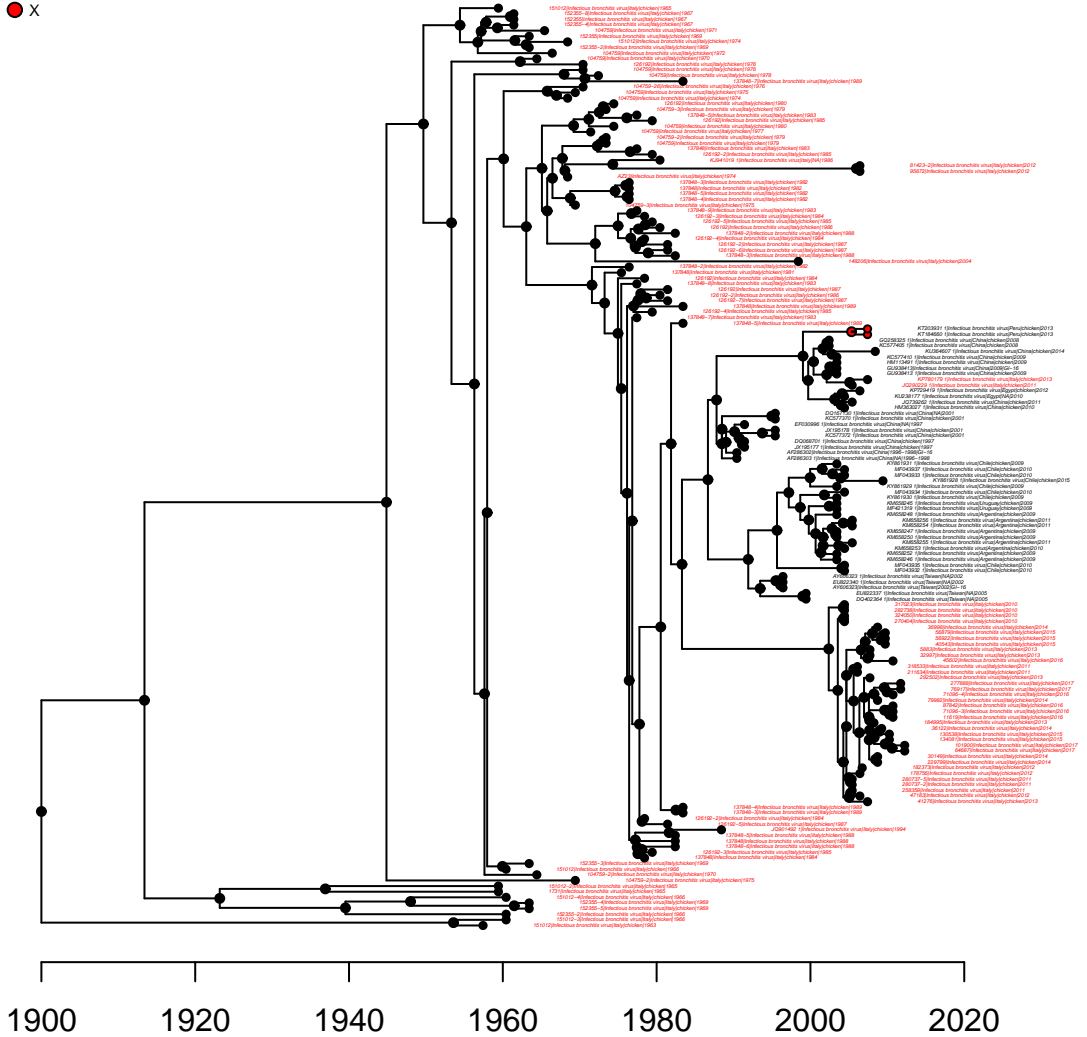

● F  
● X  
● Y

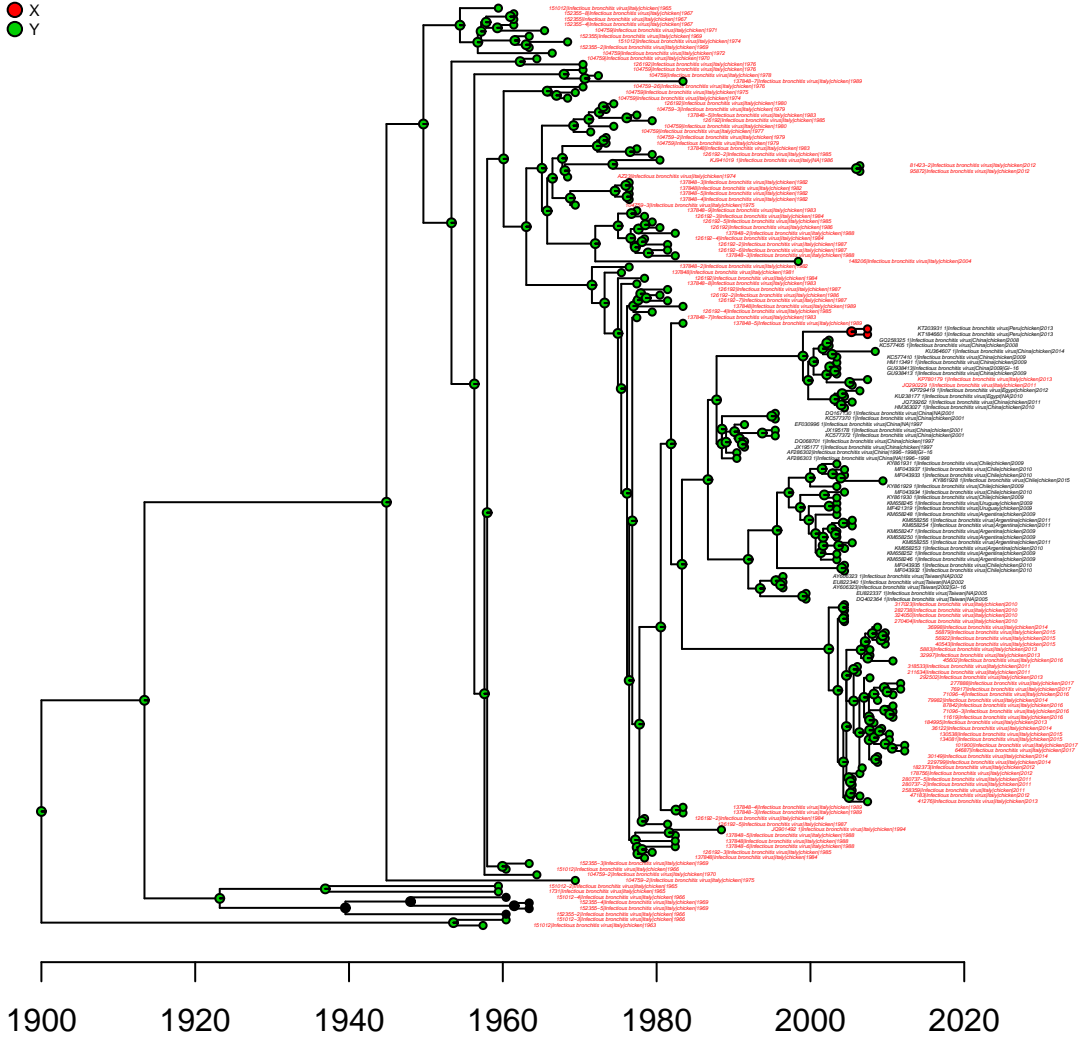

● K  
● R  
● T

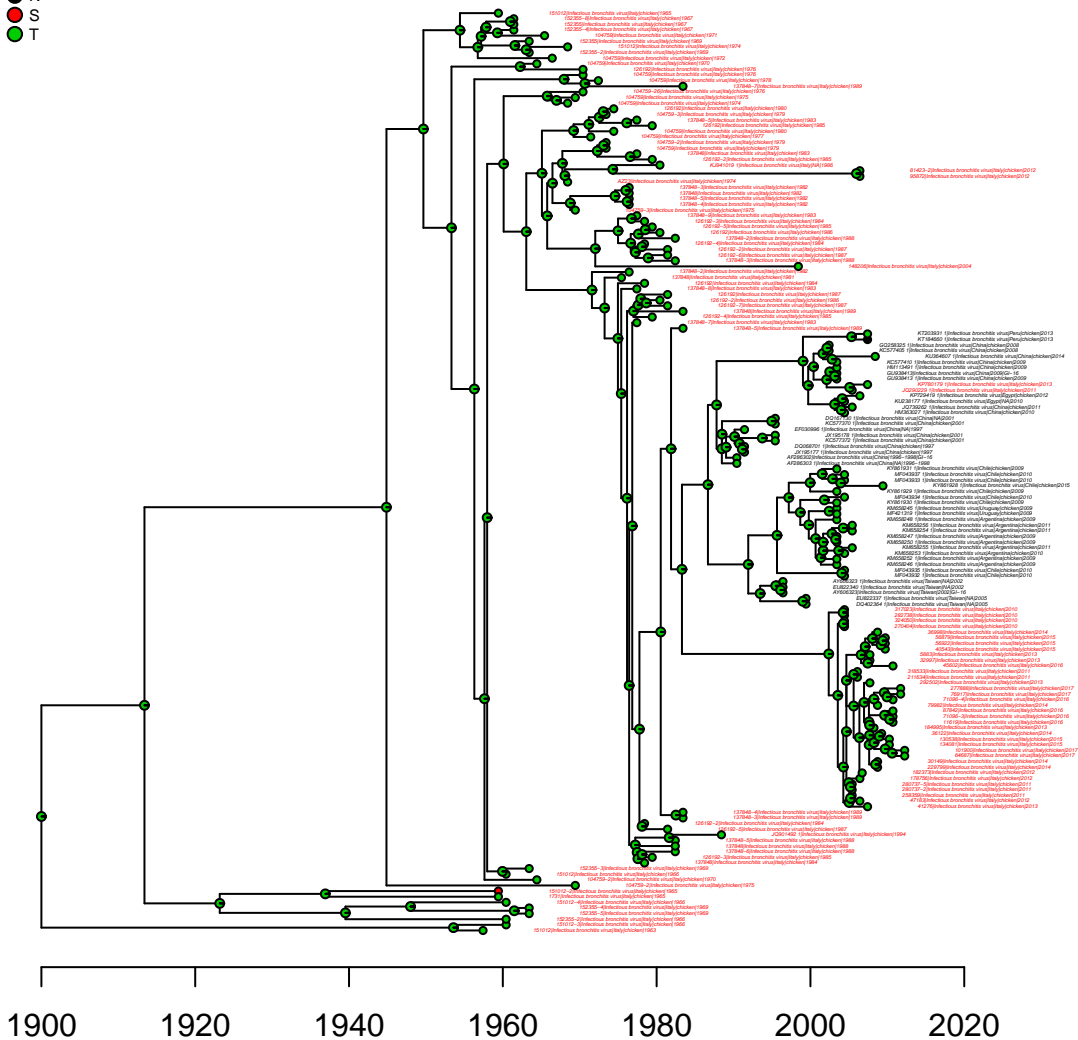

● S  
● T

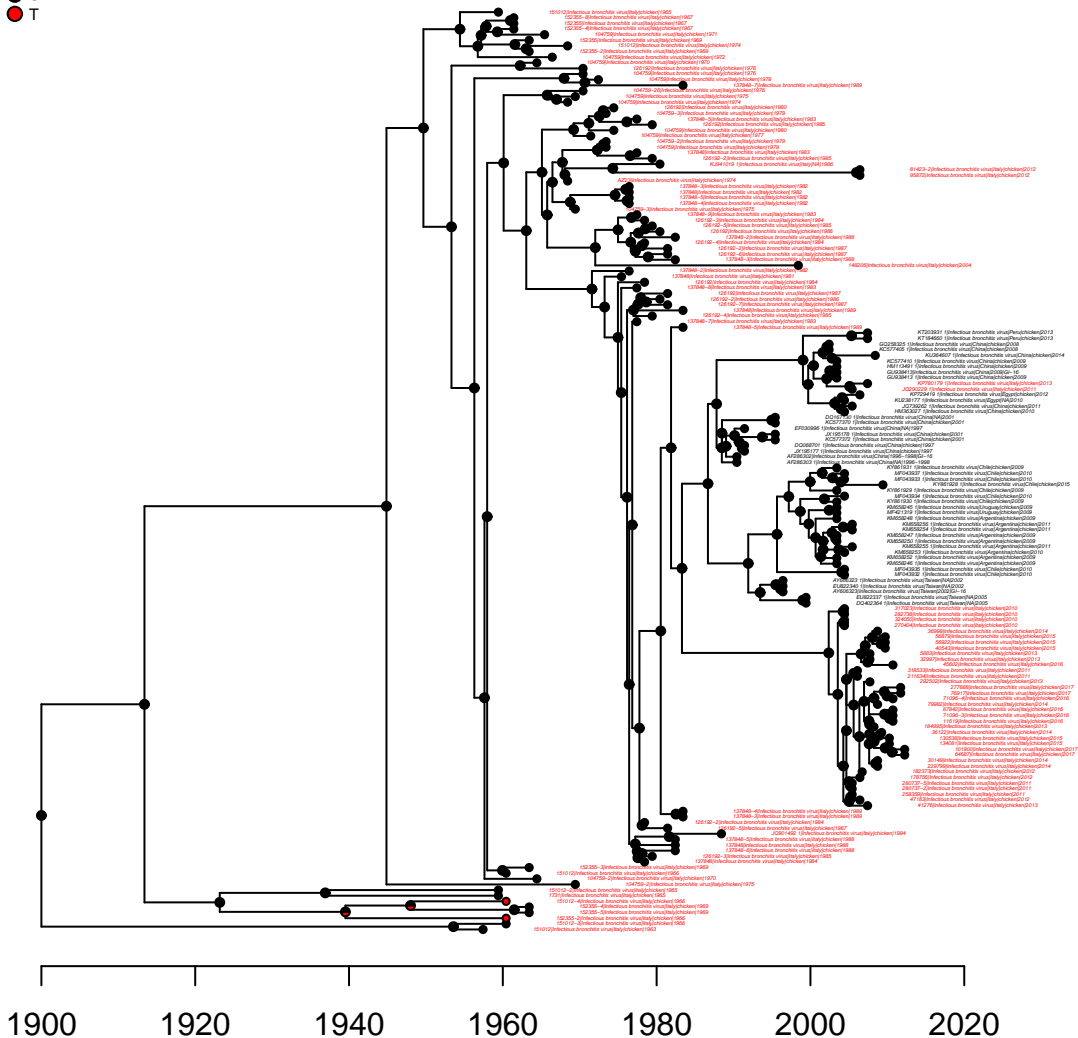



● A  
● V

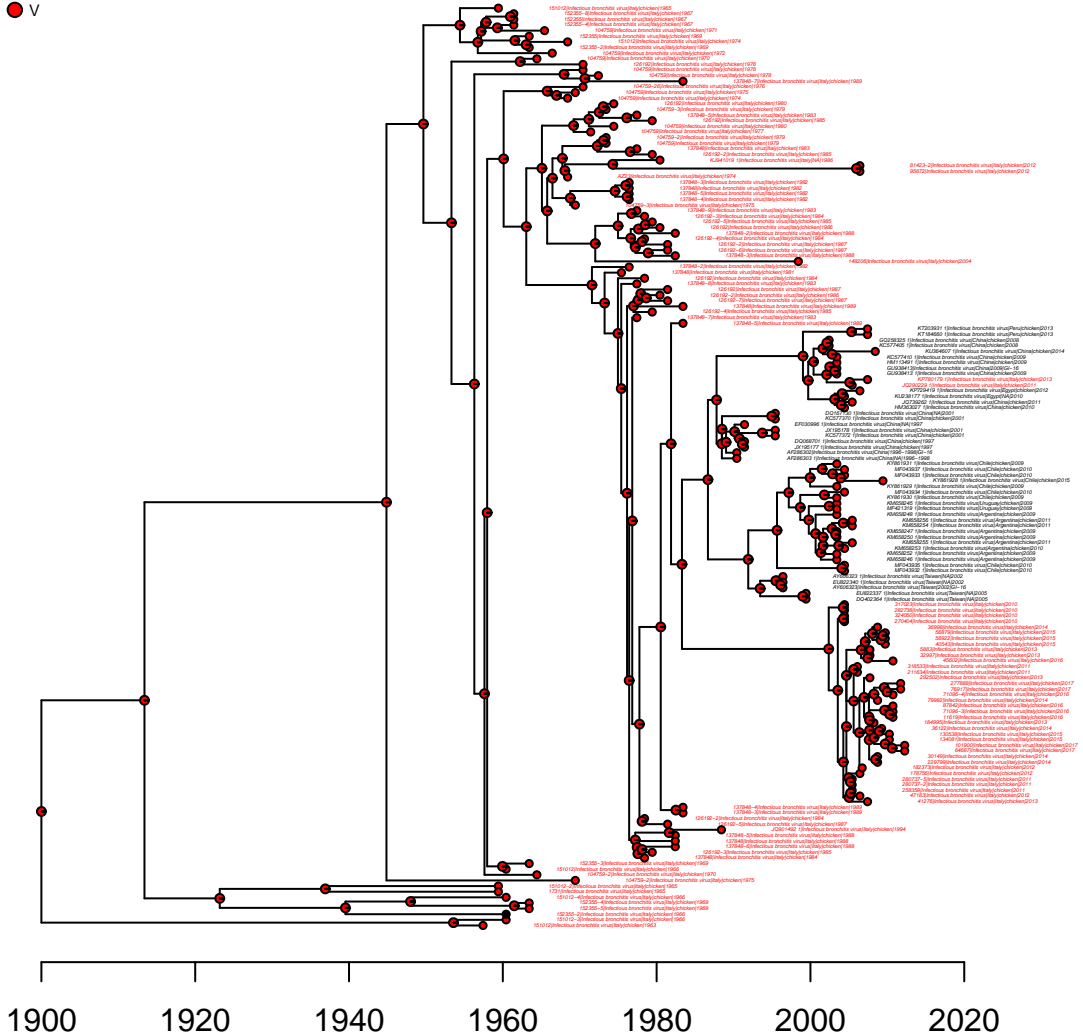

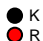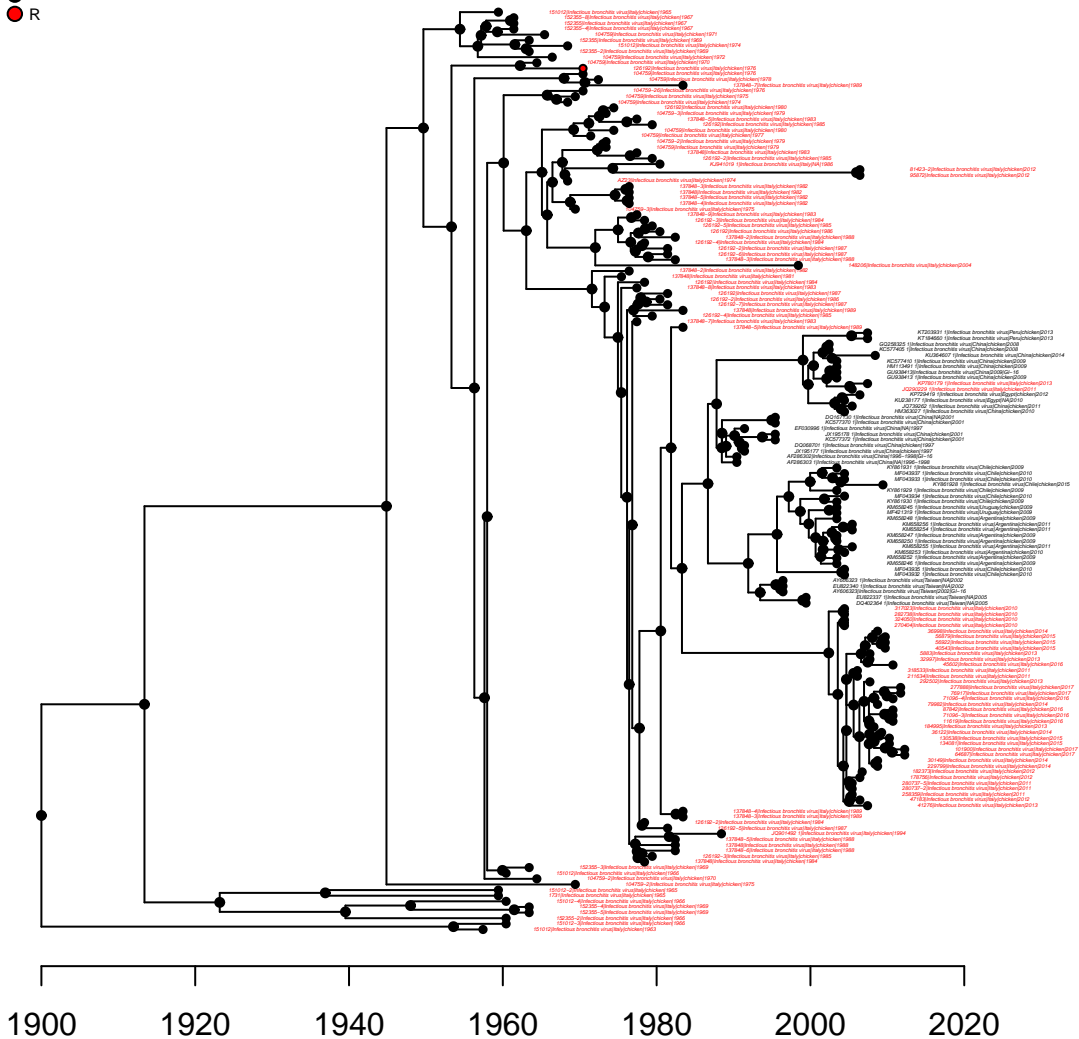



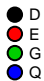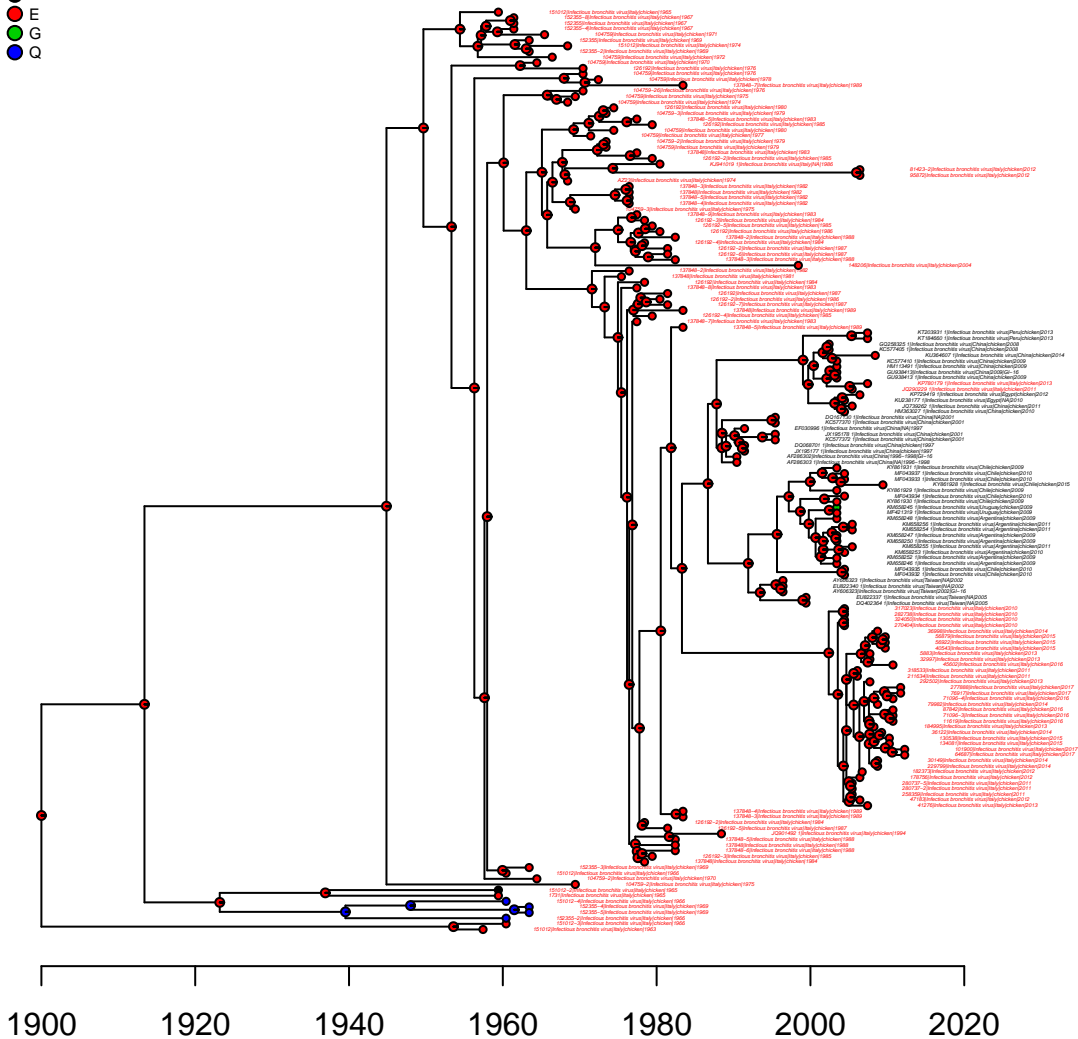

● K  
● R

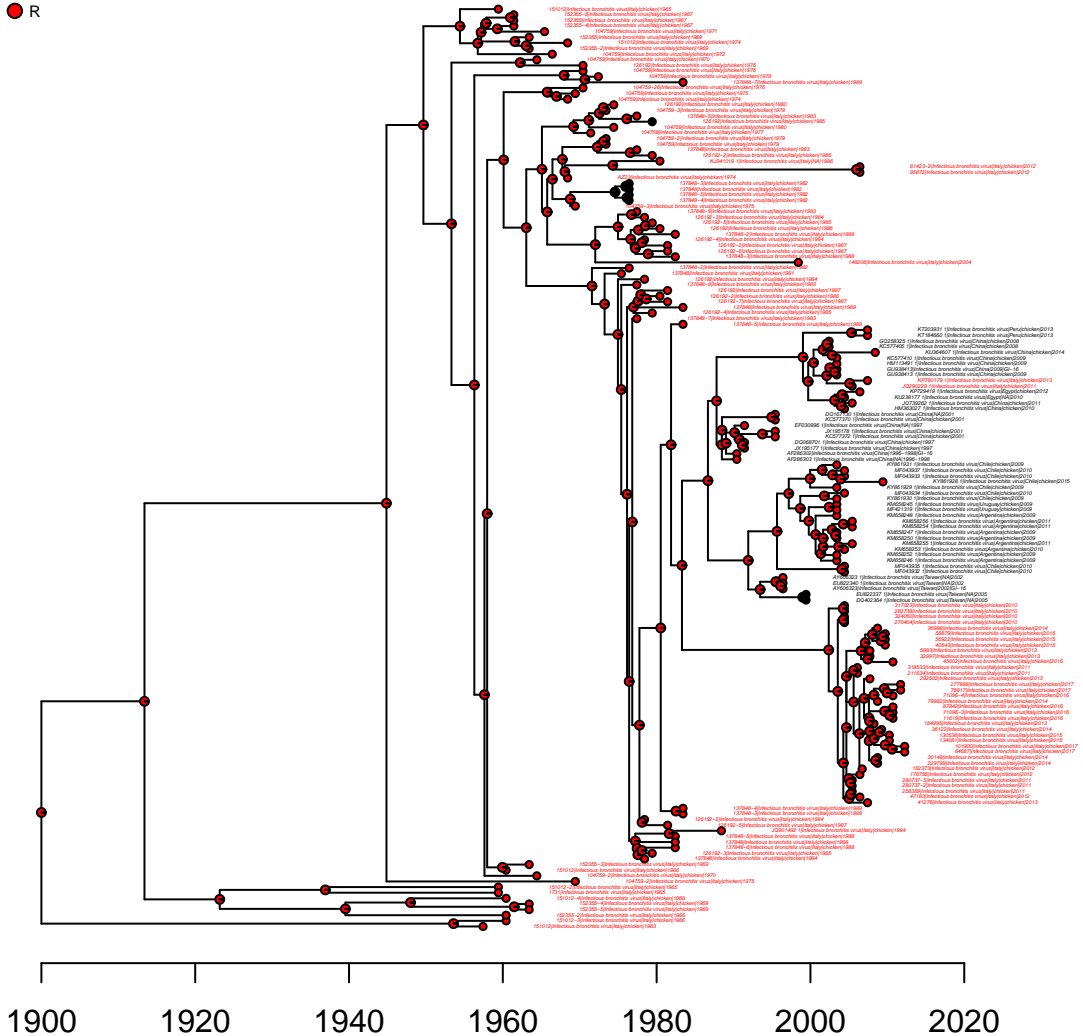

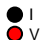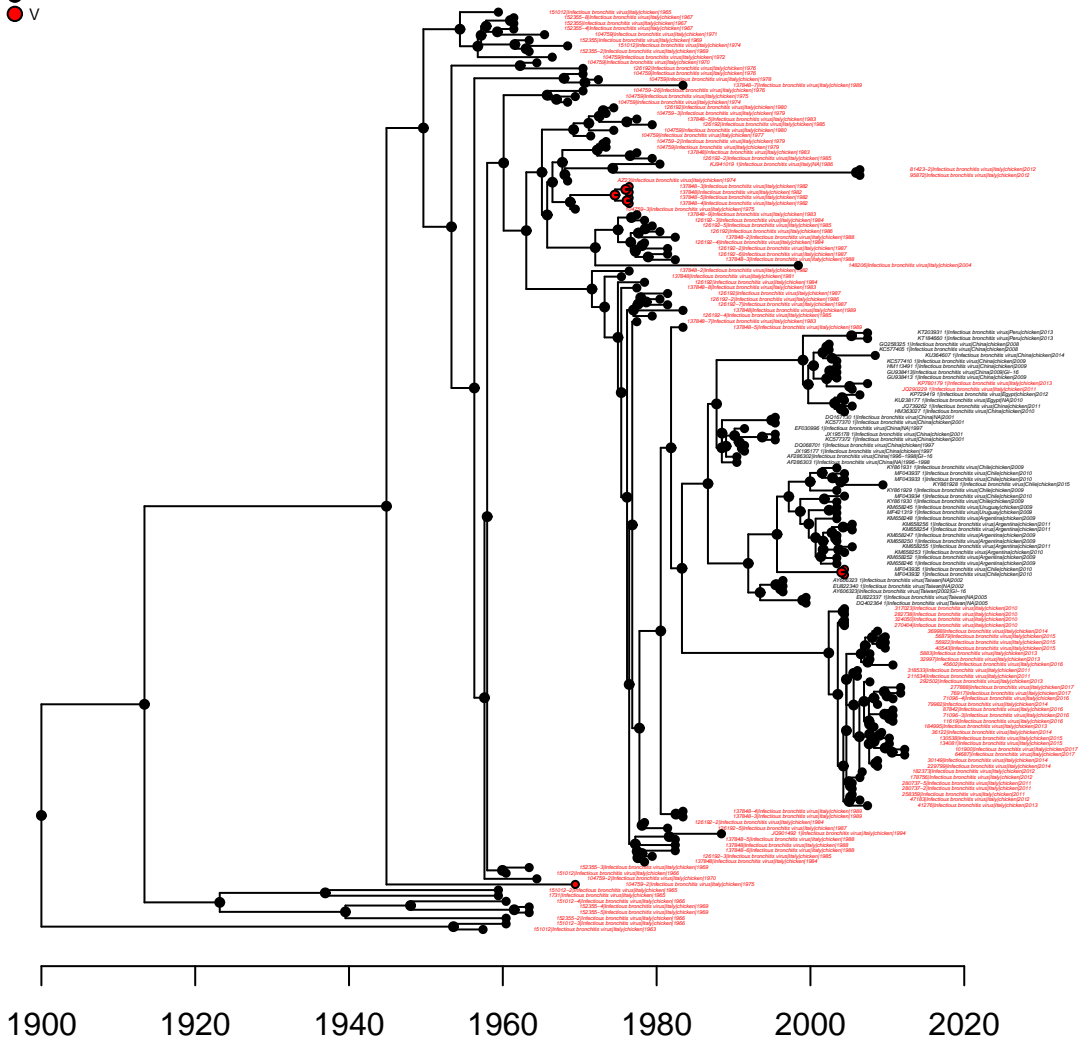

● H  
● Y

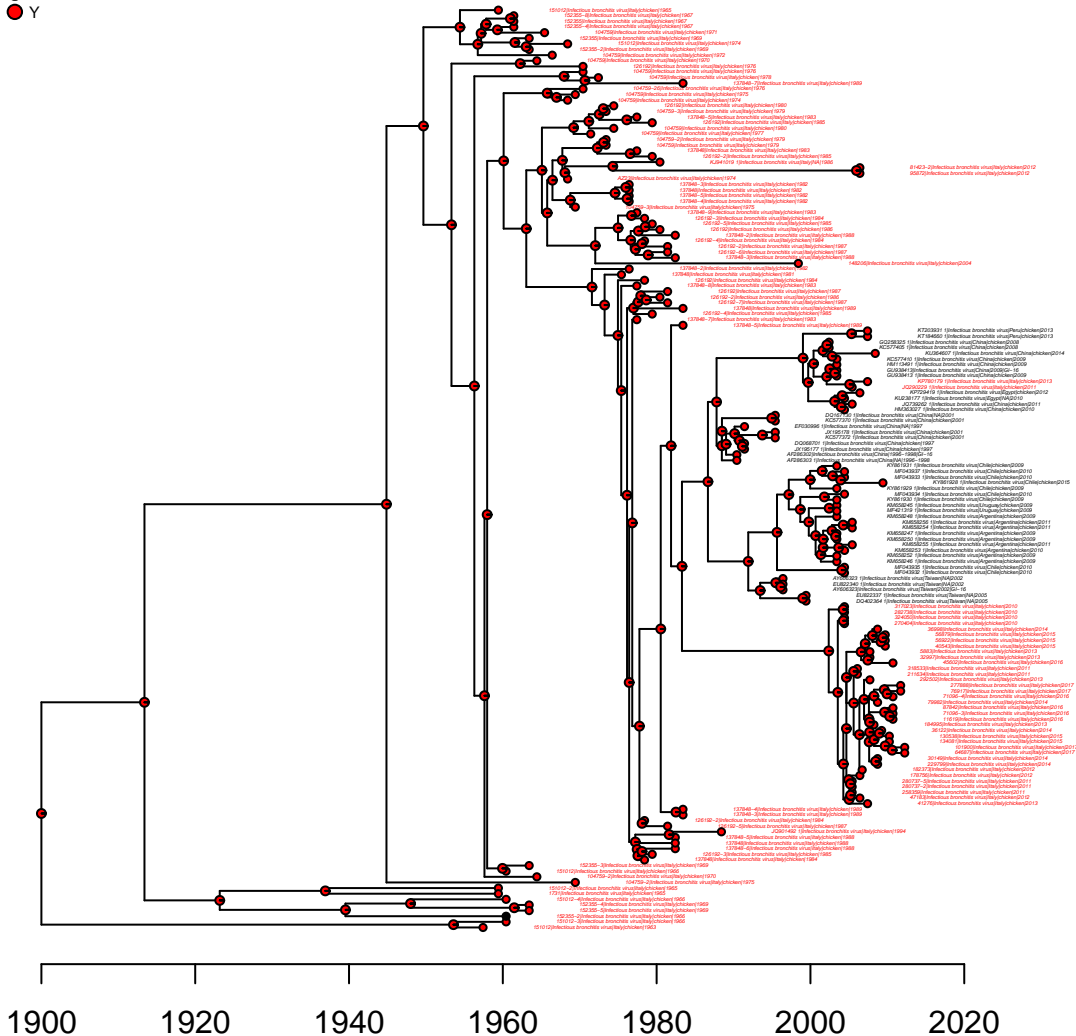

● G  
● R  
● T

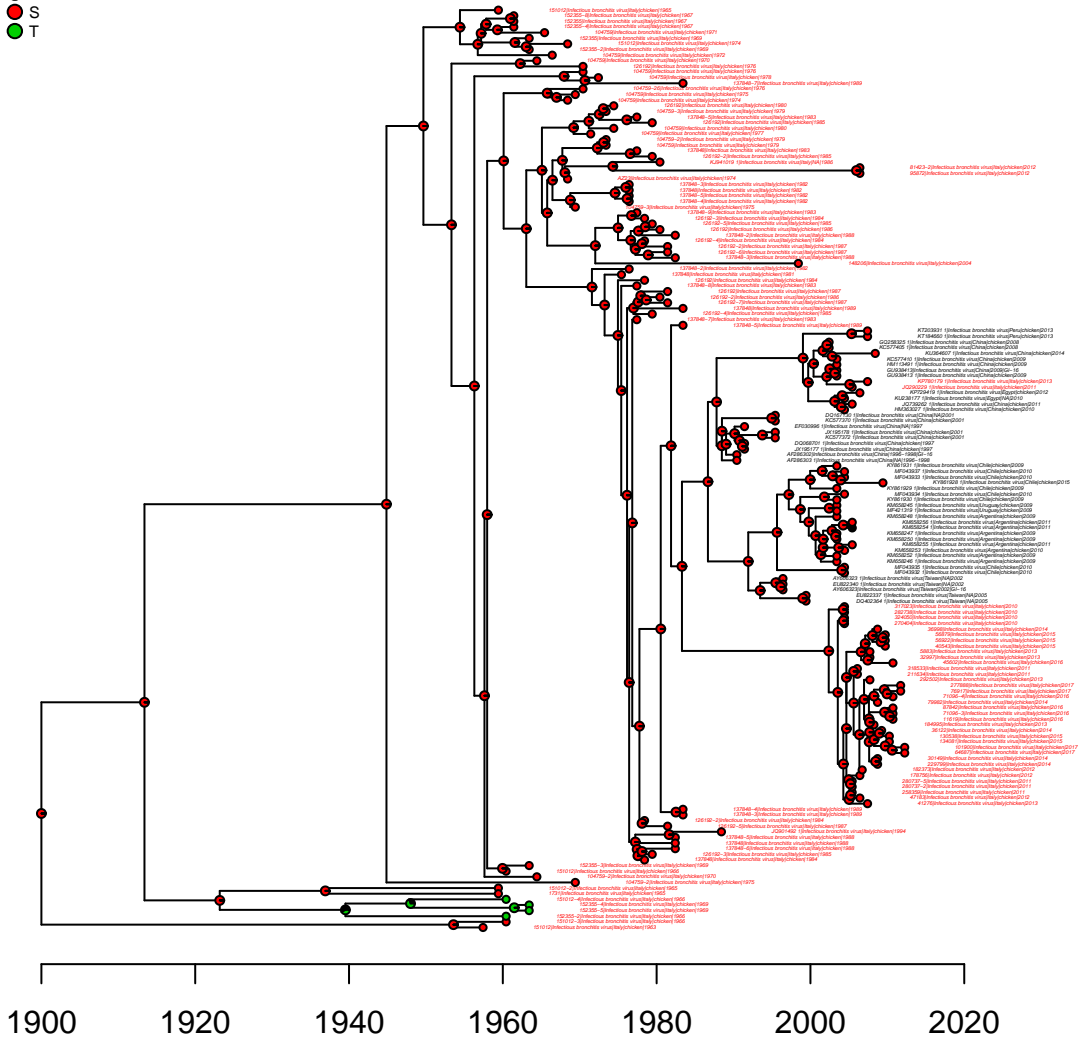









● I  
● T  
● X

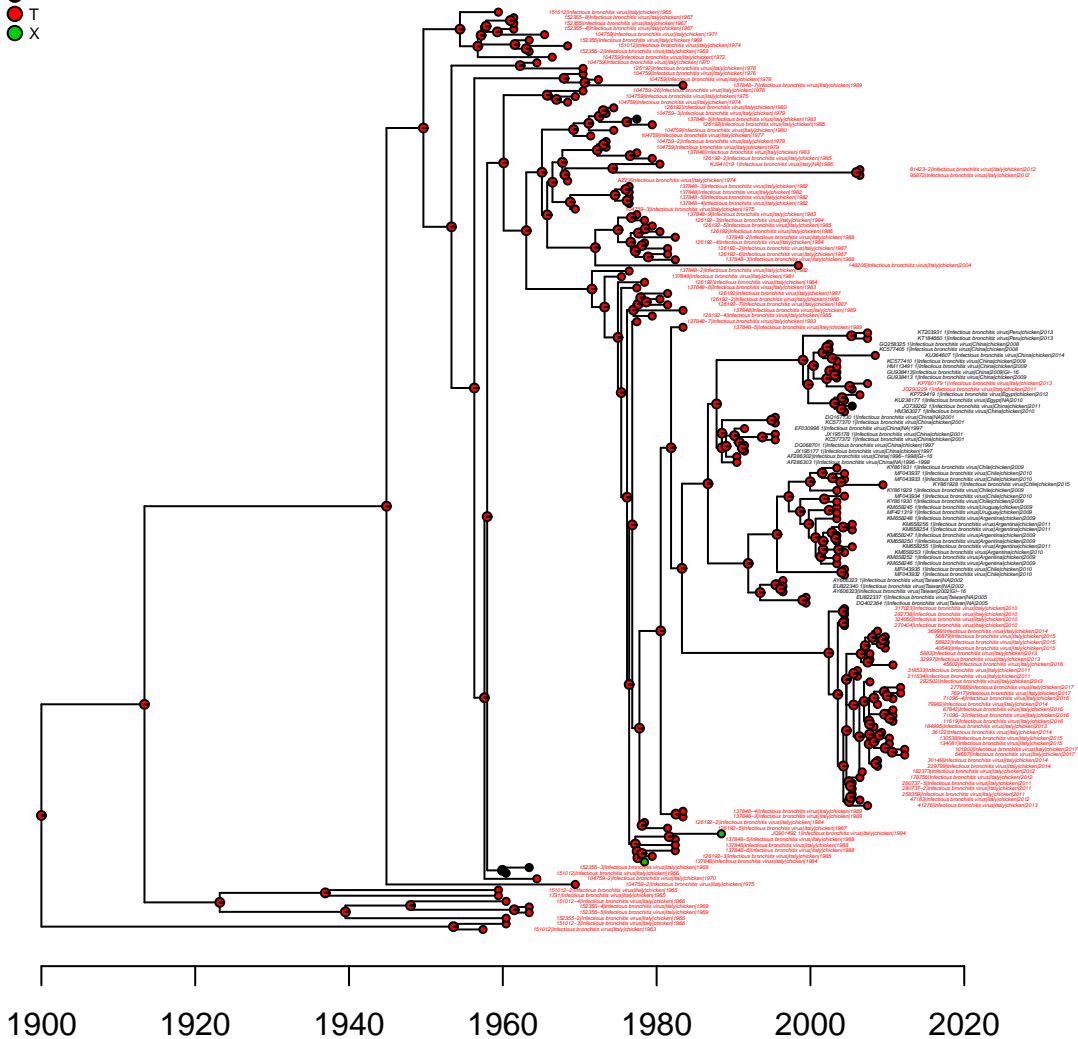

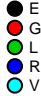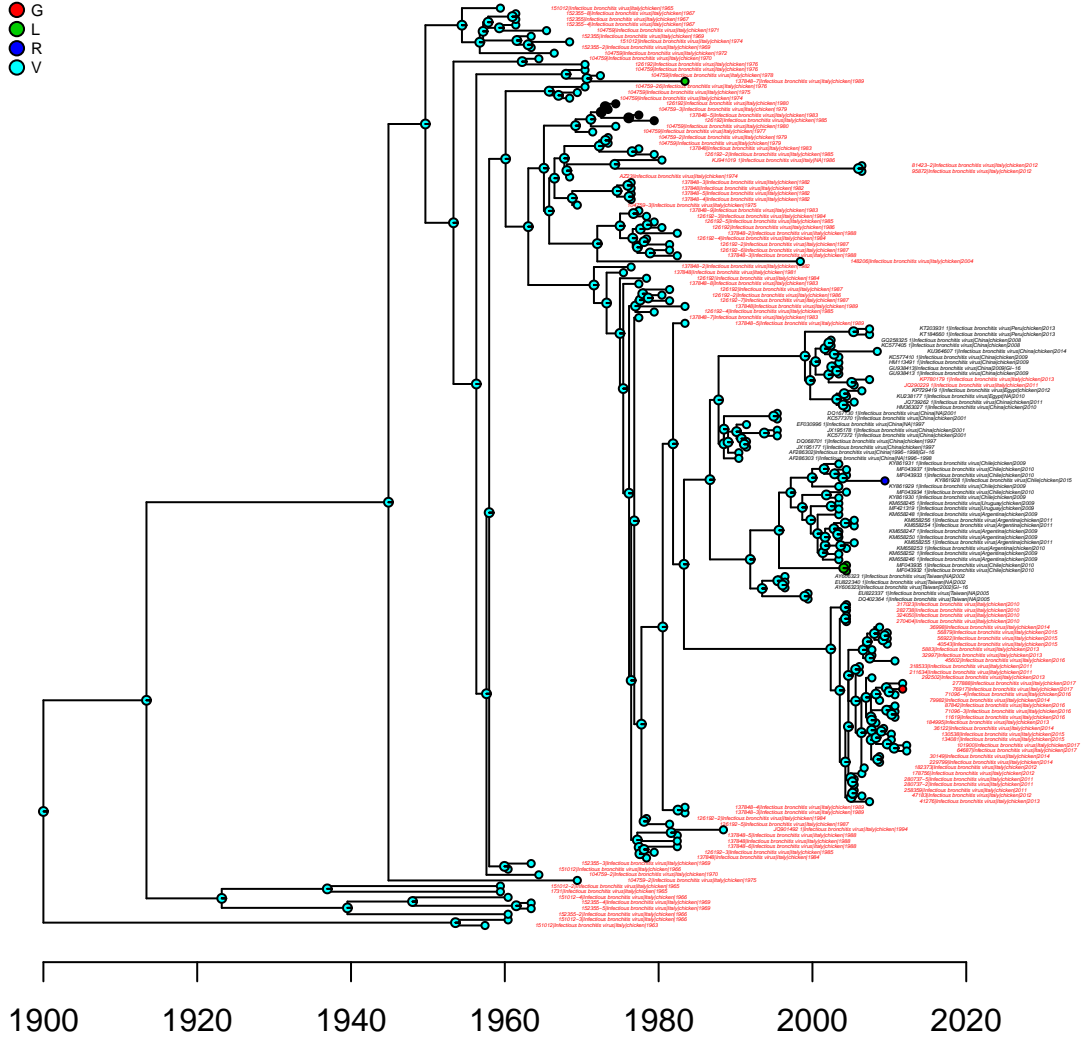

● L  
● V

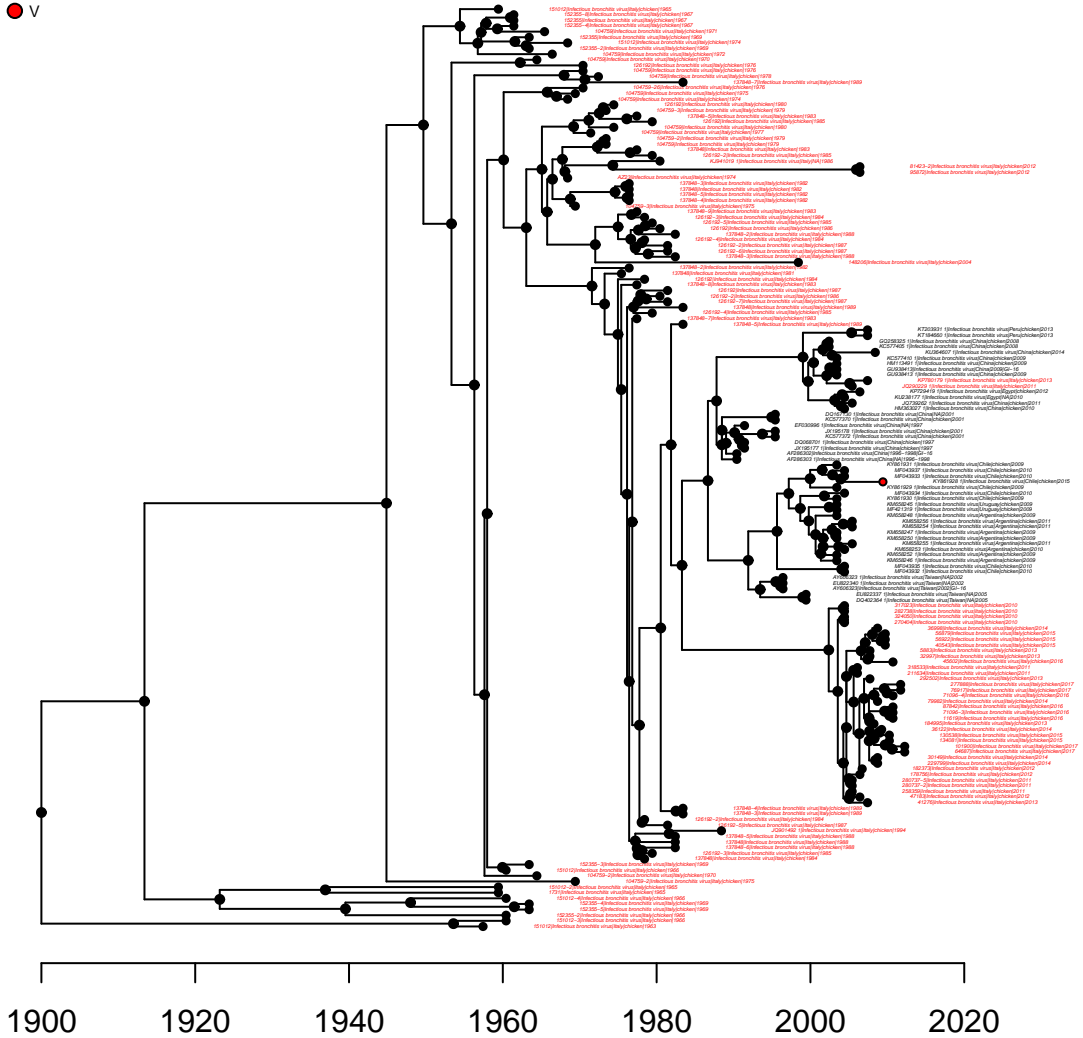



F  
I  
L

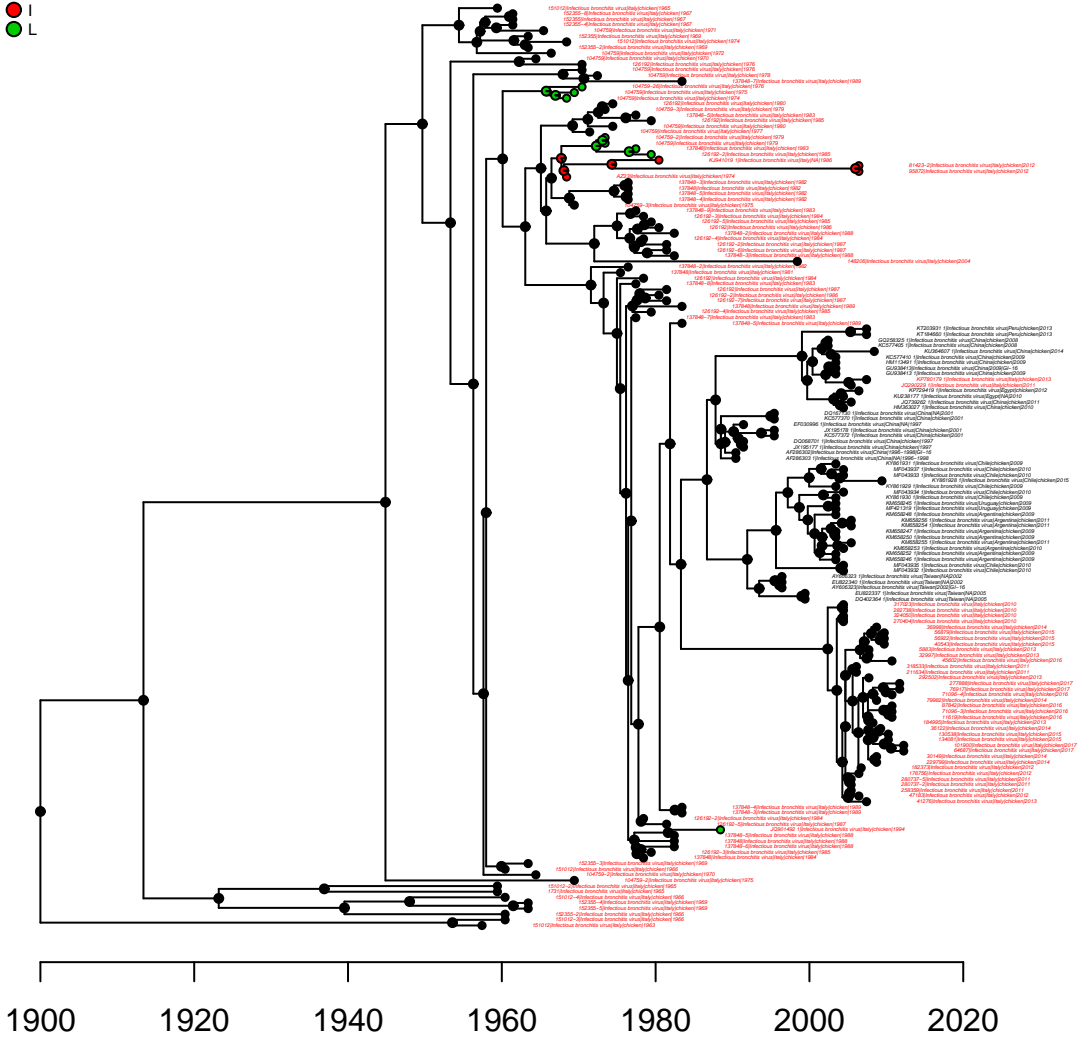

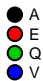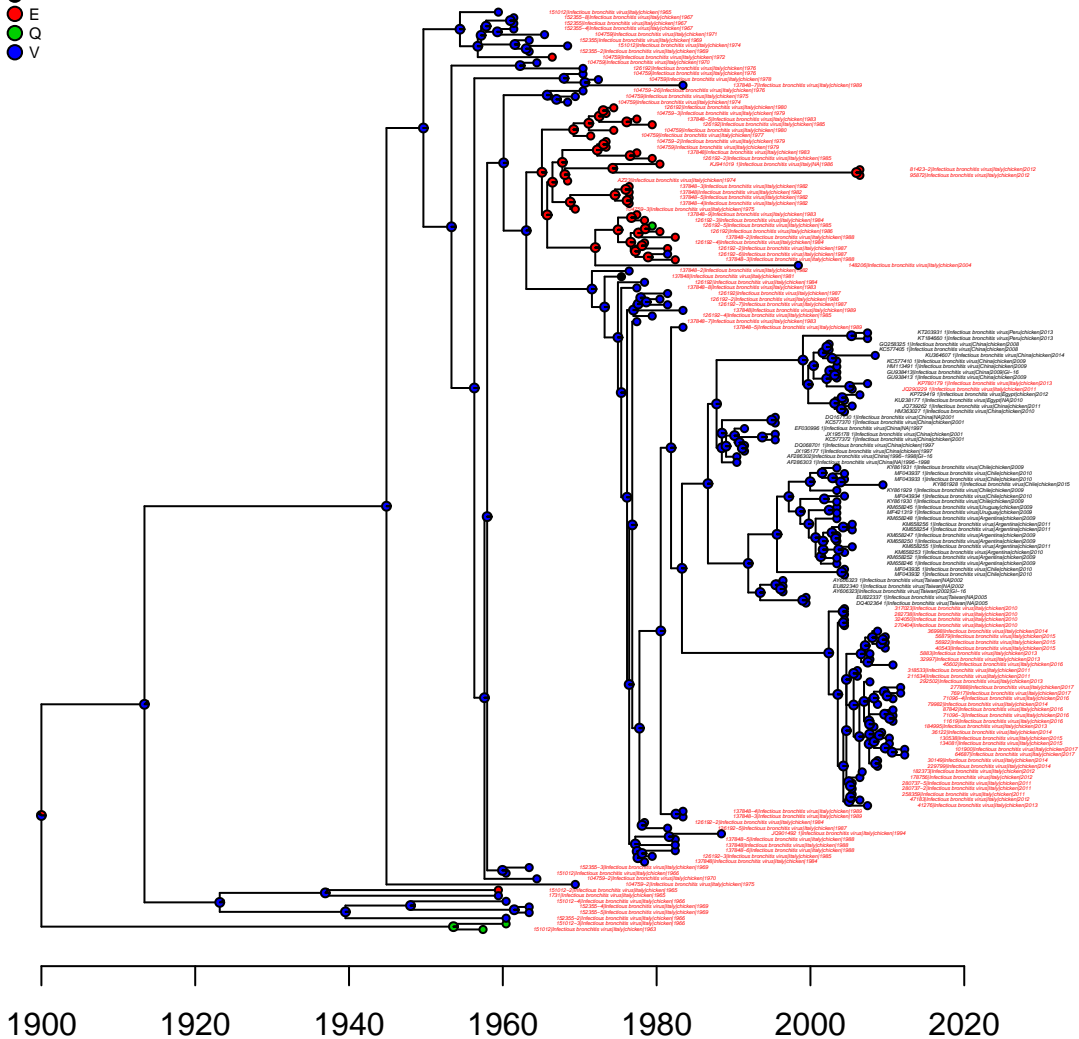

● S  
● T

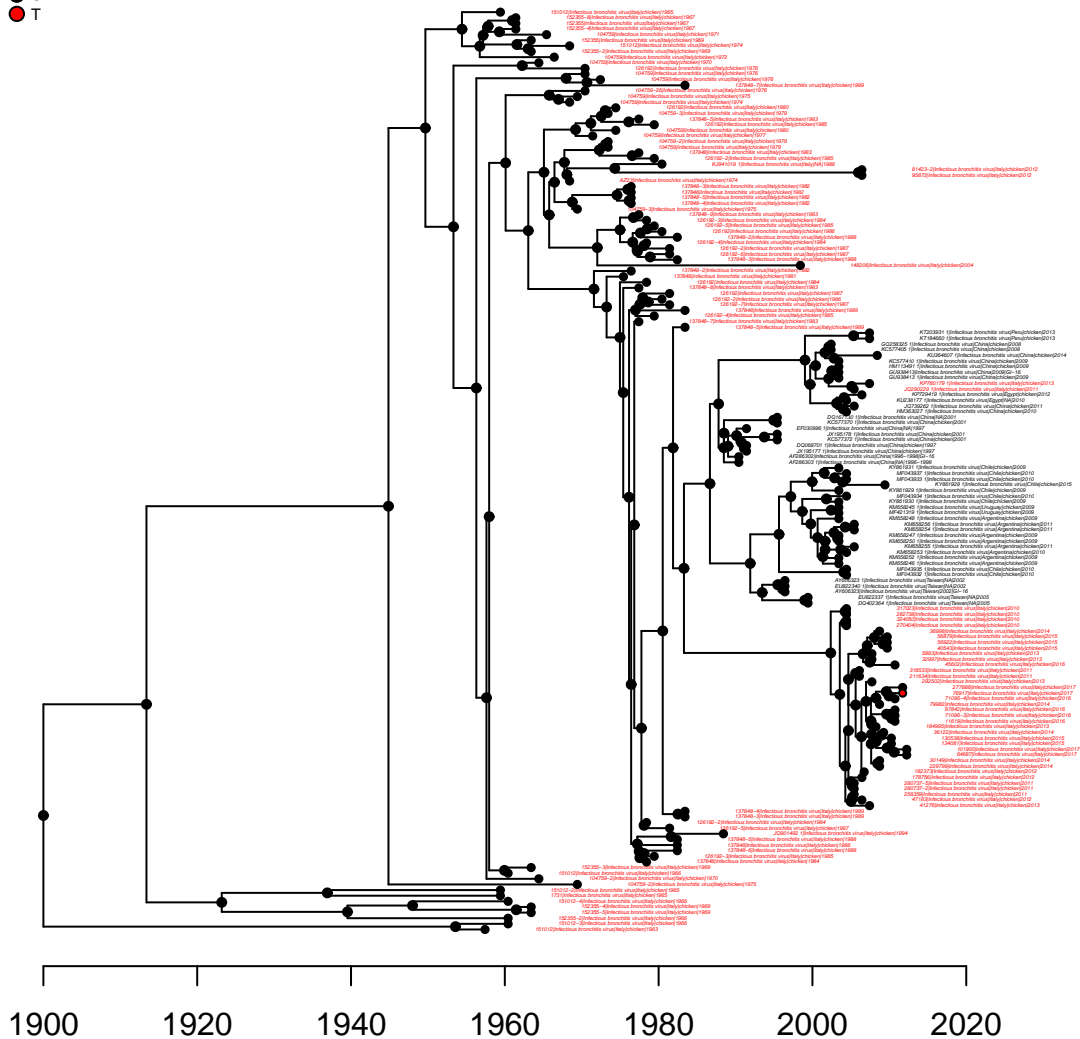

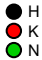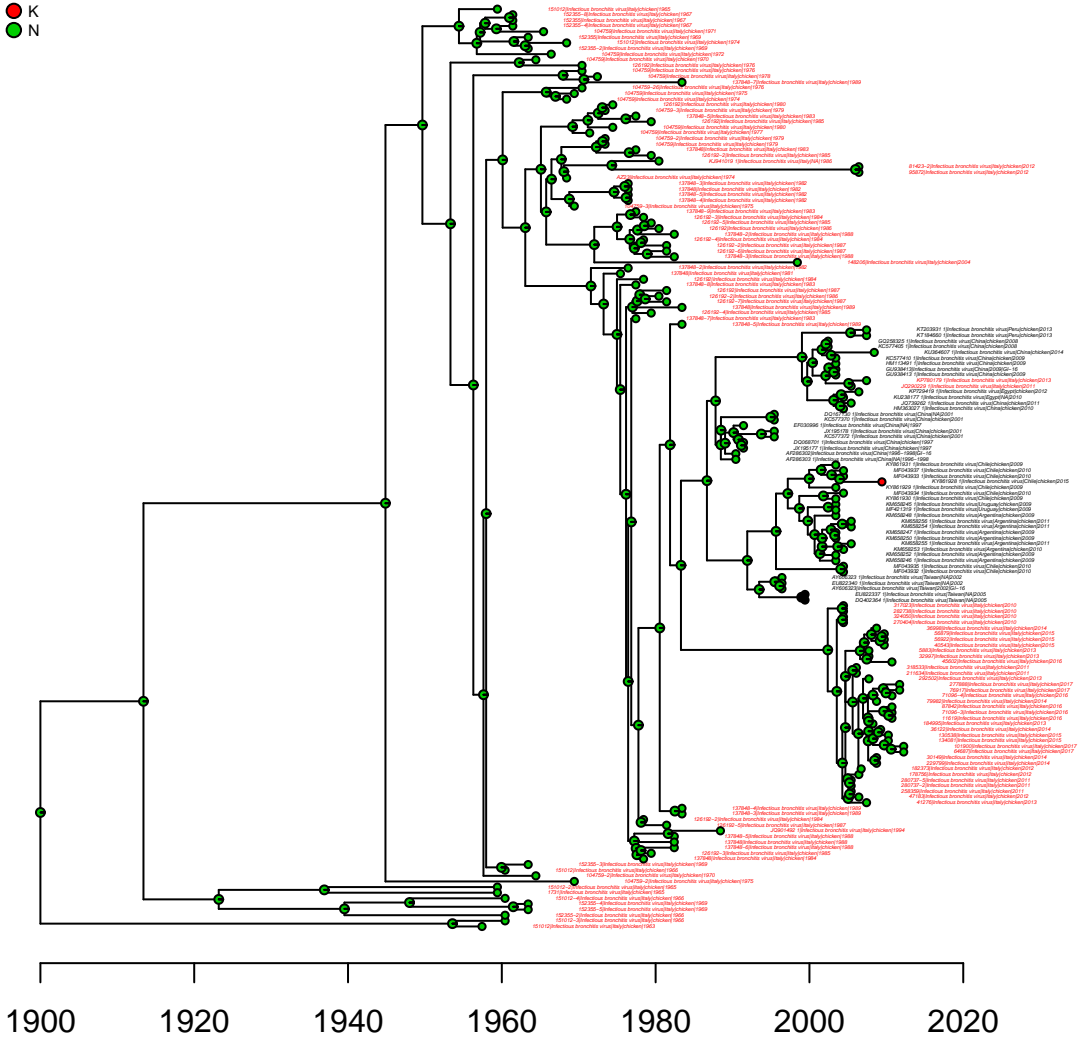



● A  
● R

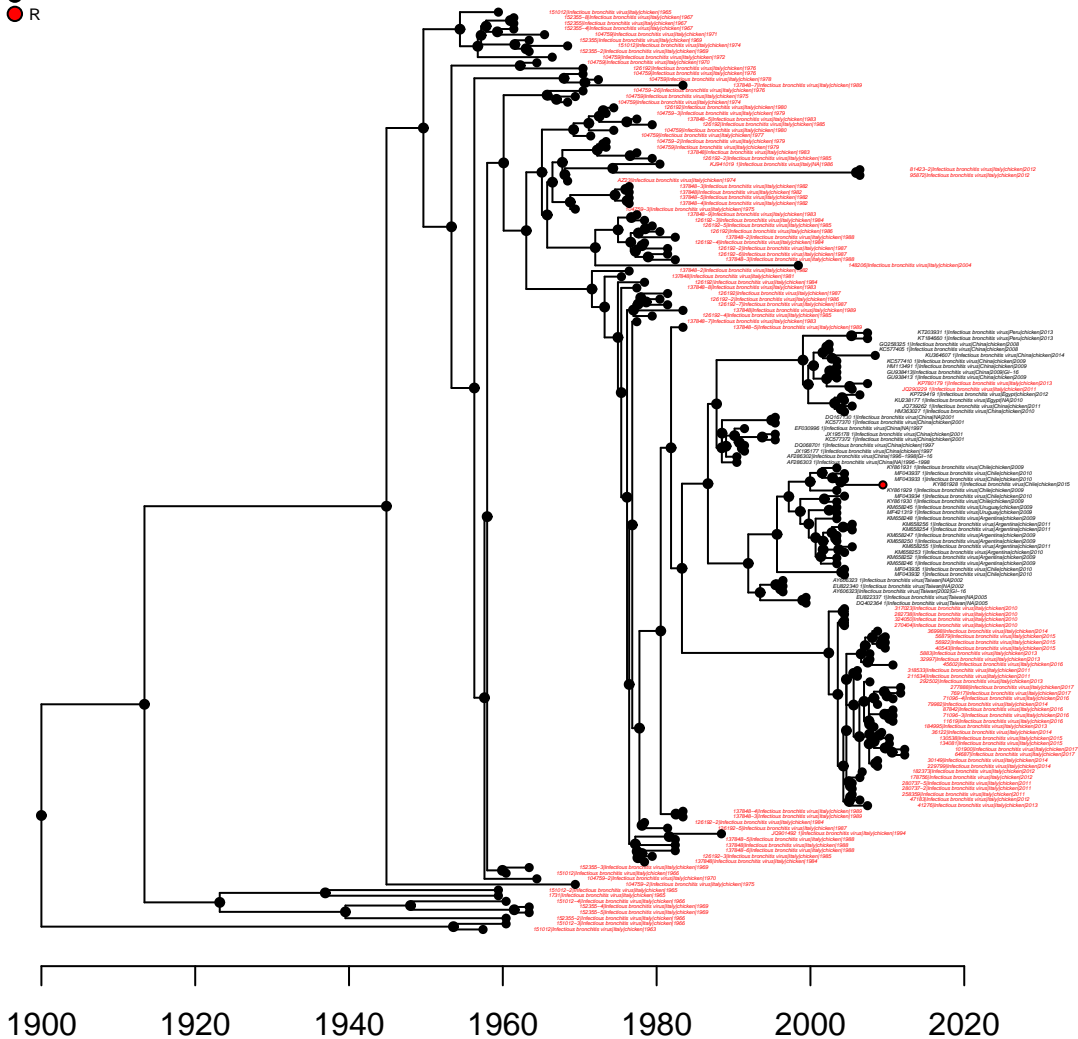



● P  
● S

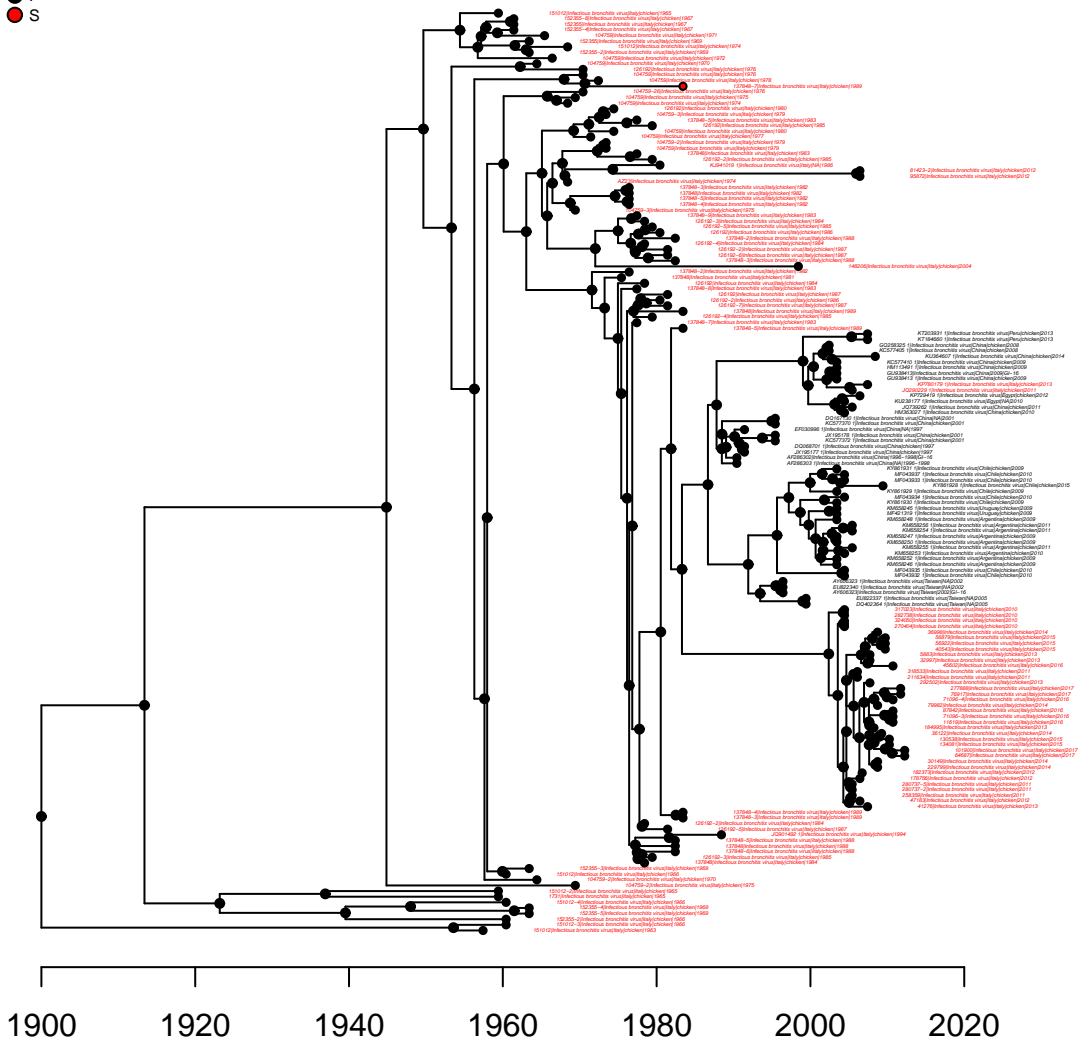

● N  
● X

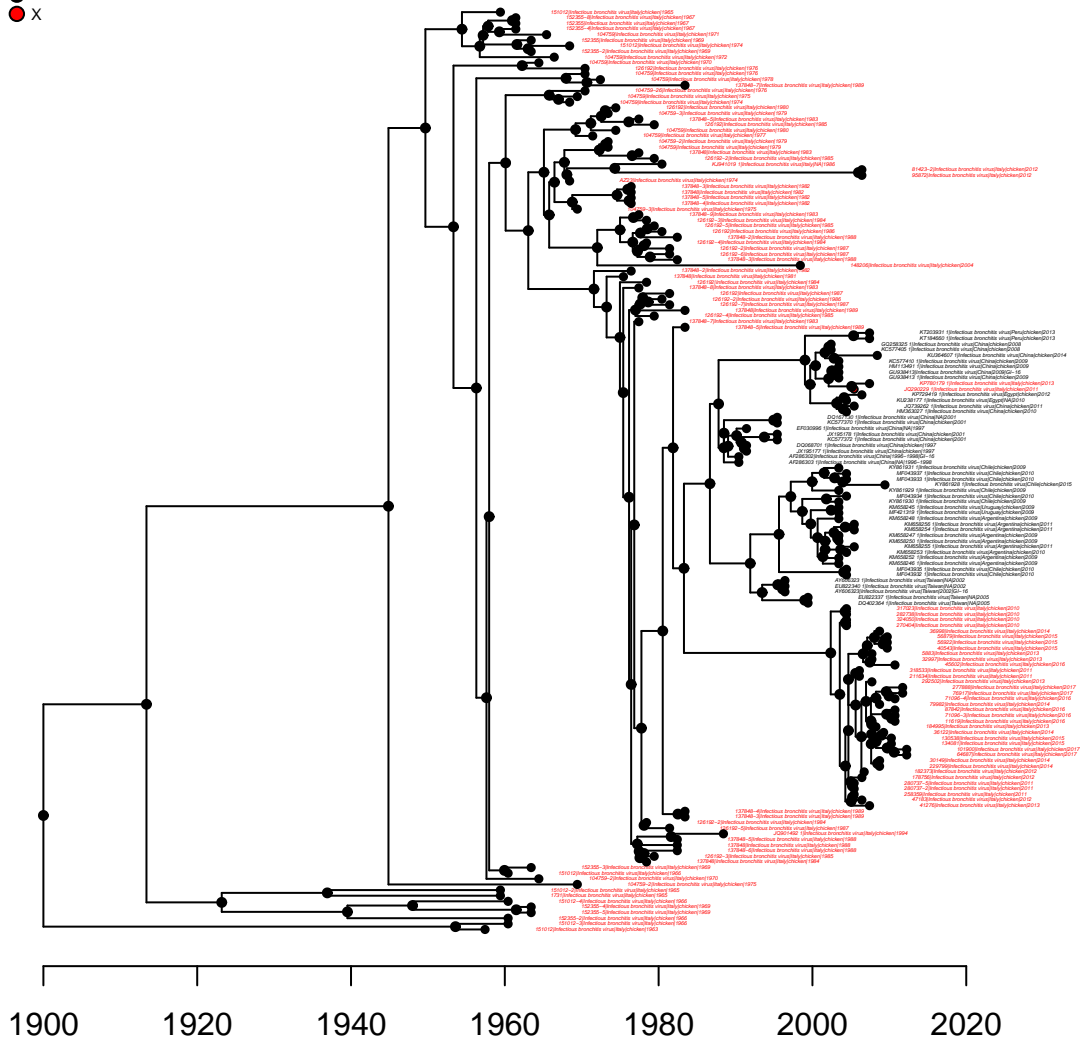

● I  
● K  
● N  
● S  
● T  
● X

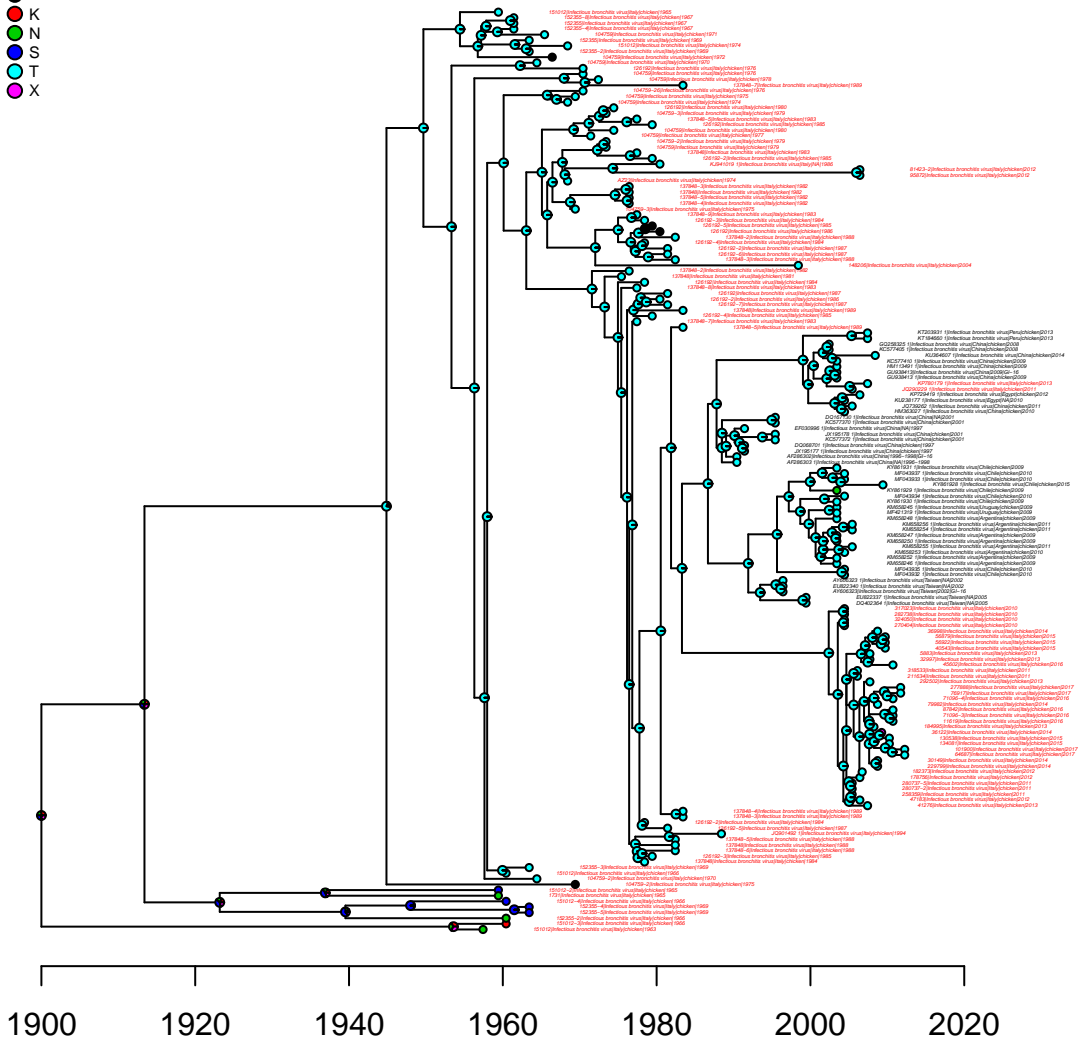

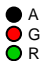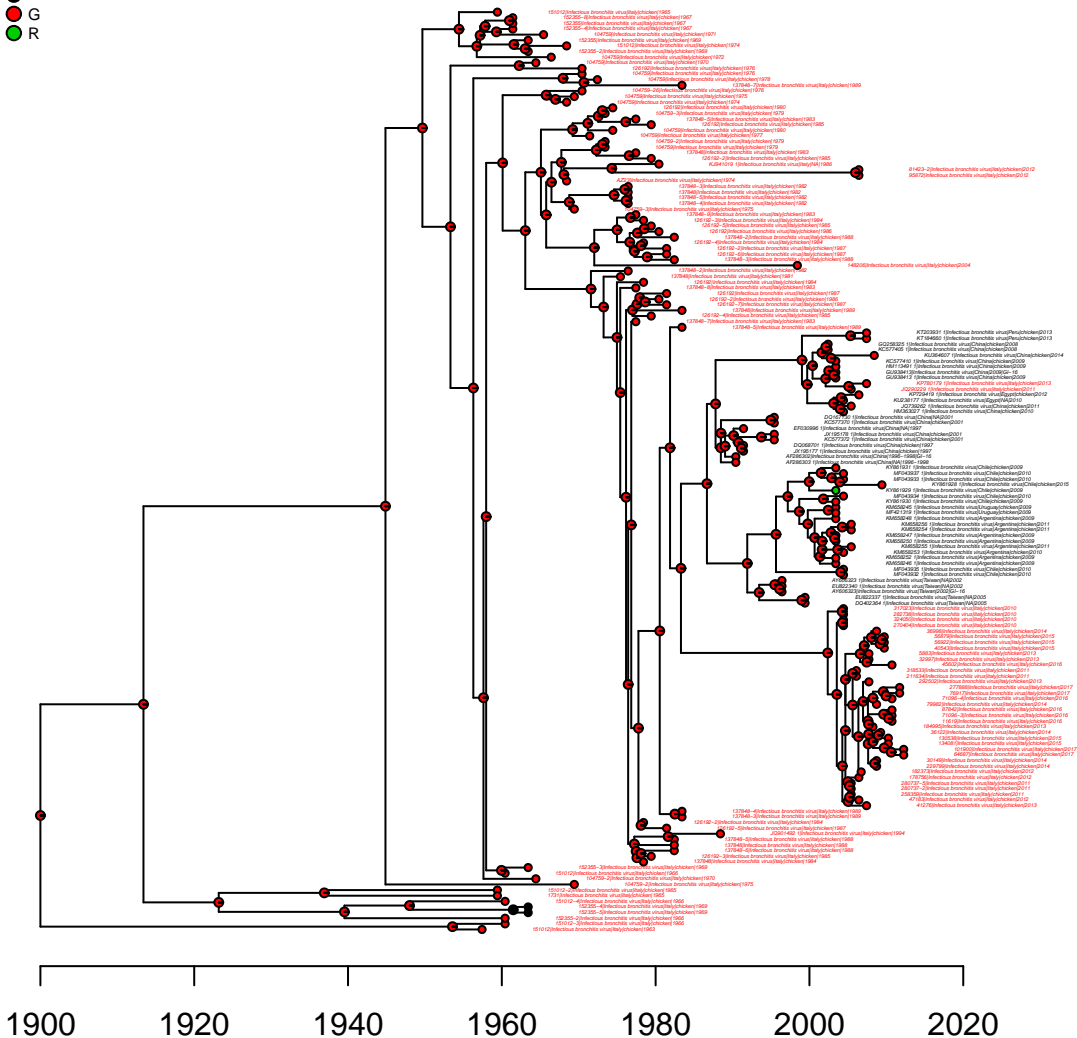

● D  
 ● G  
 ● N  
 ● R  
 ● Y

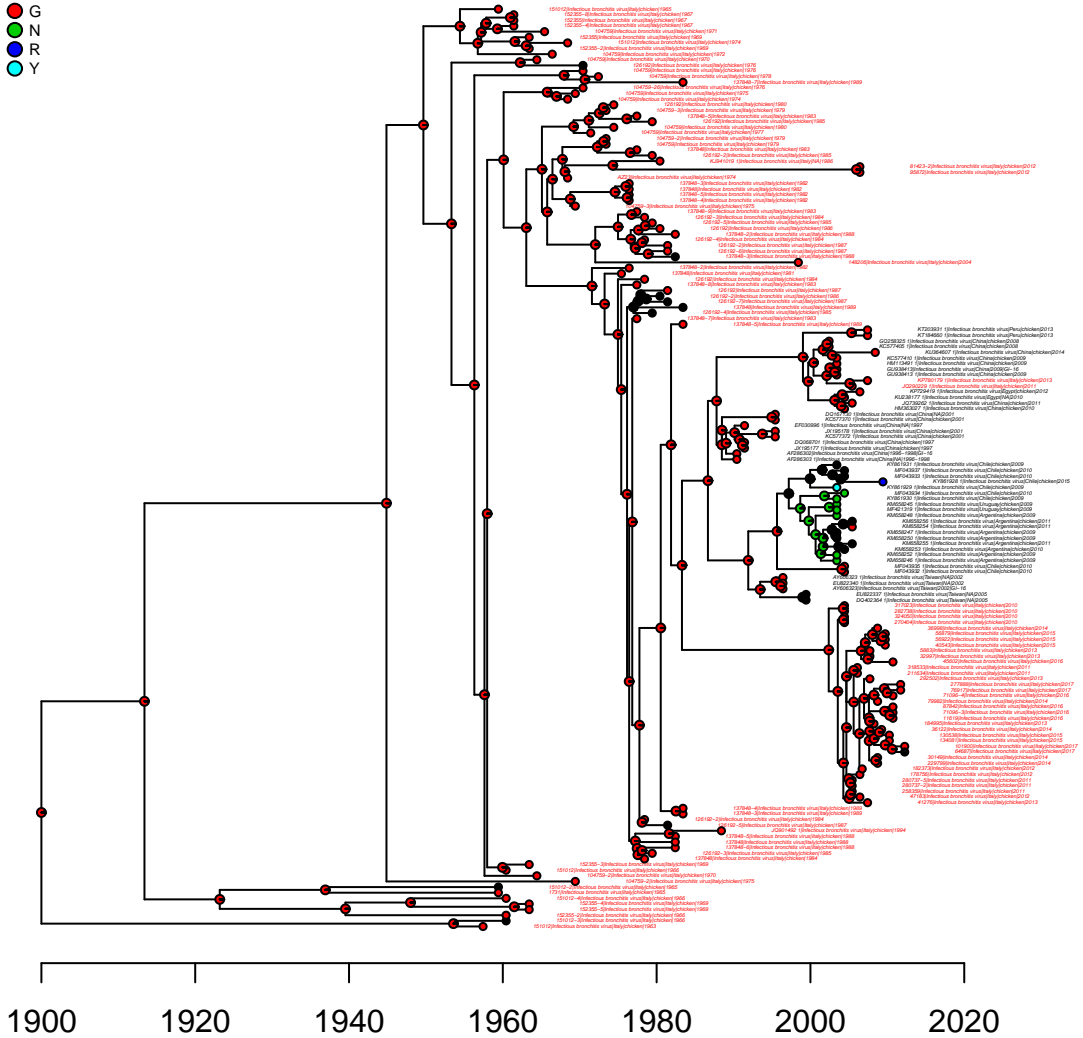





● A  
● D  
● E  
● G  
● H  
● I  
● N  
● R  
● S

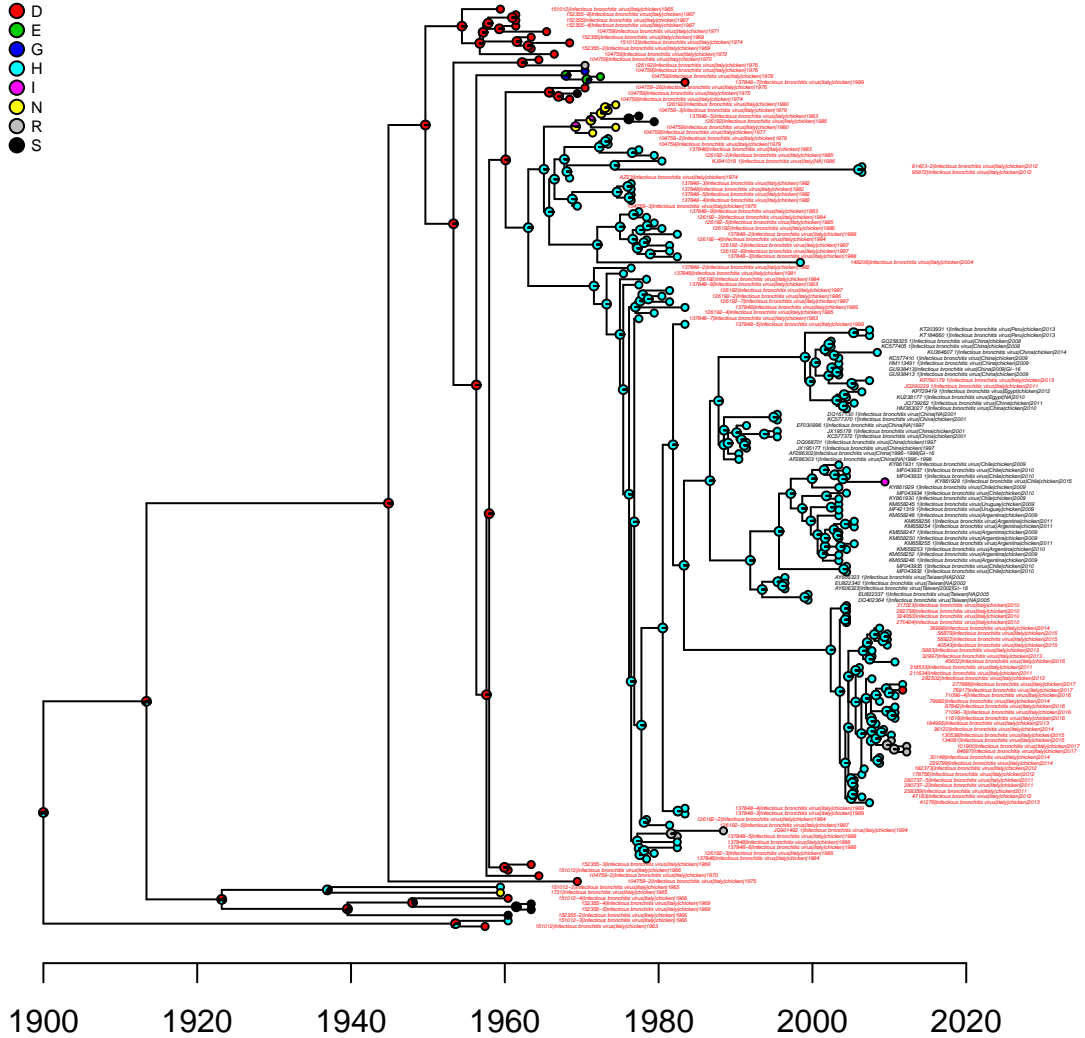

● G  
● S  
● T  
● V  
● X

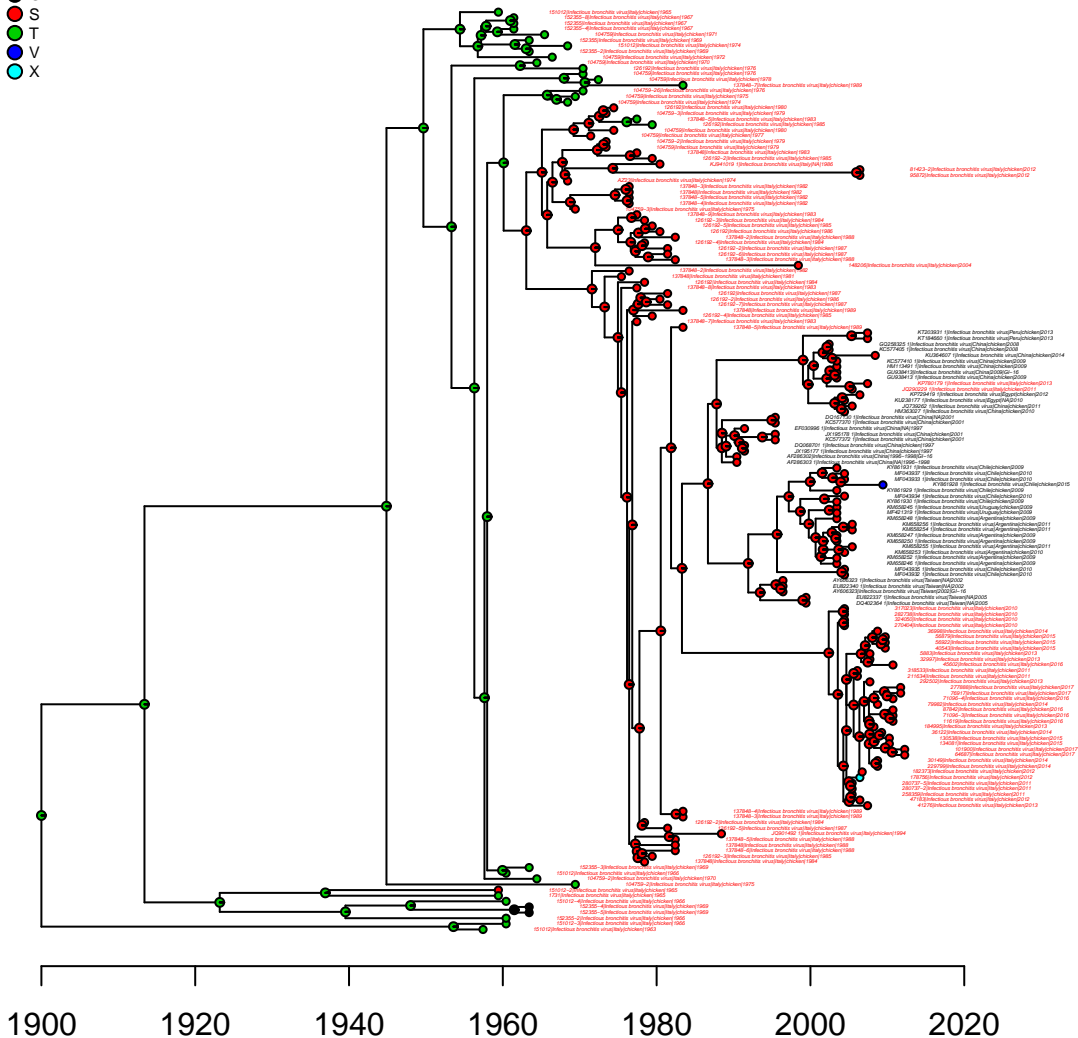

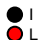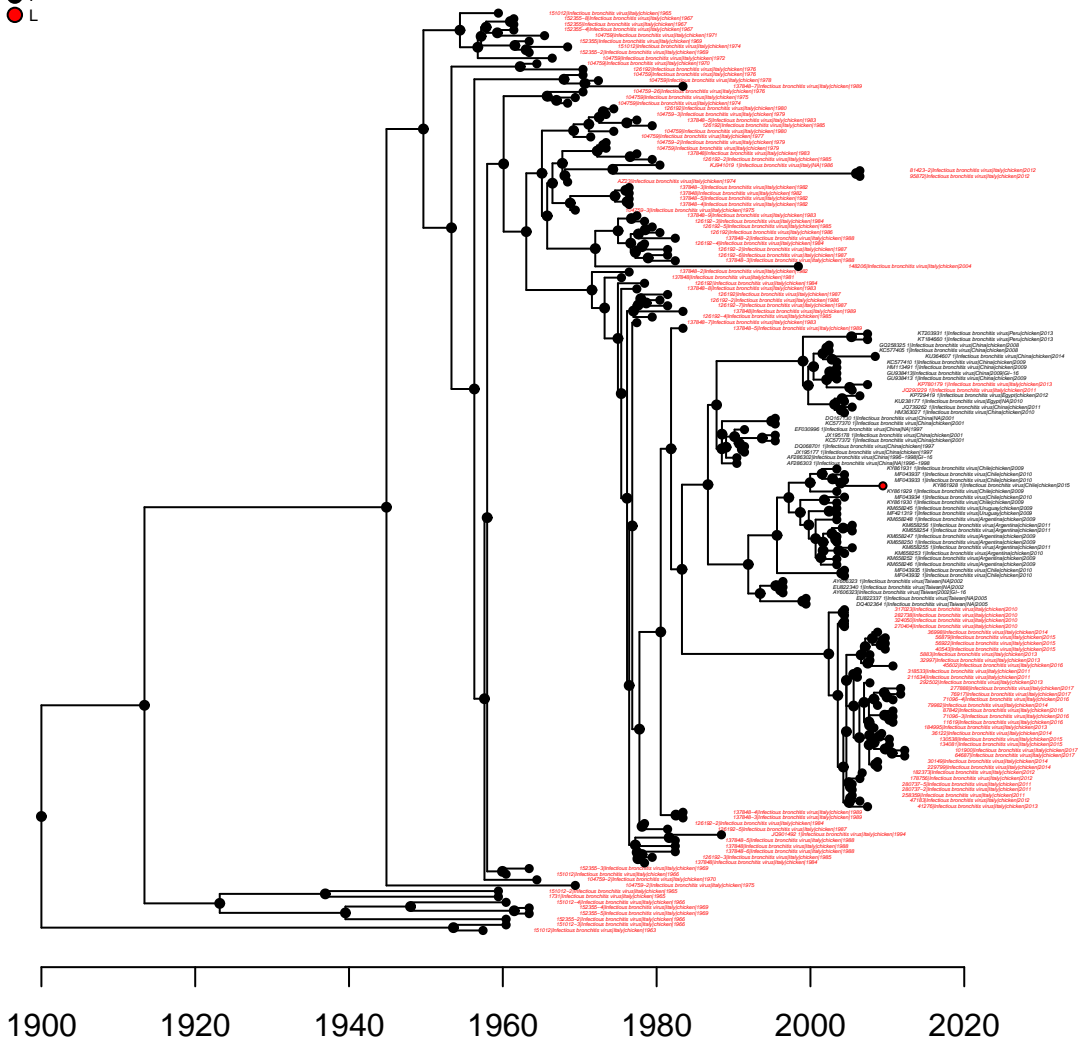

● A  
● F  
● H  
● N  
● Q  
● R  
● T  
● V

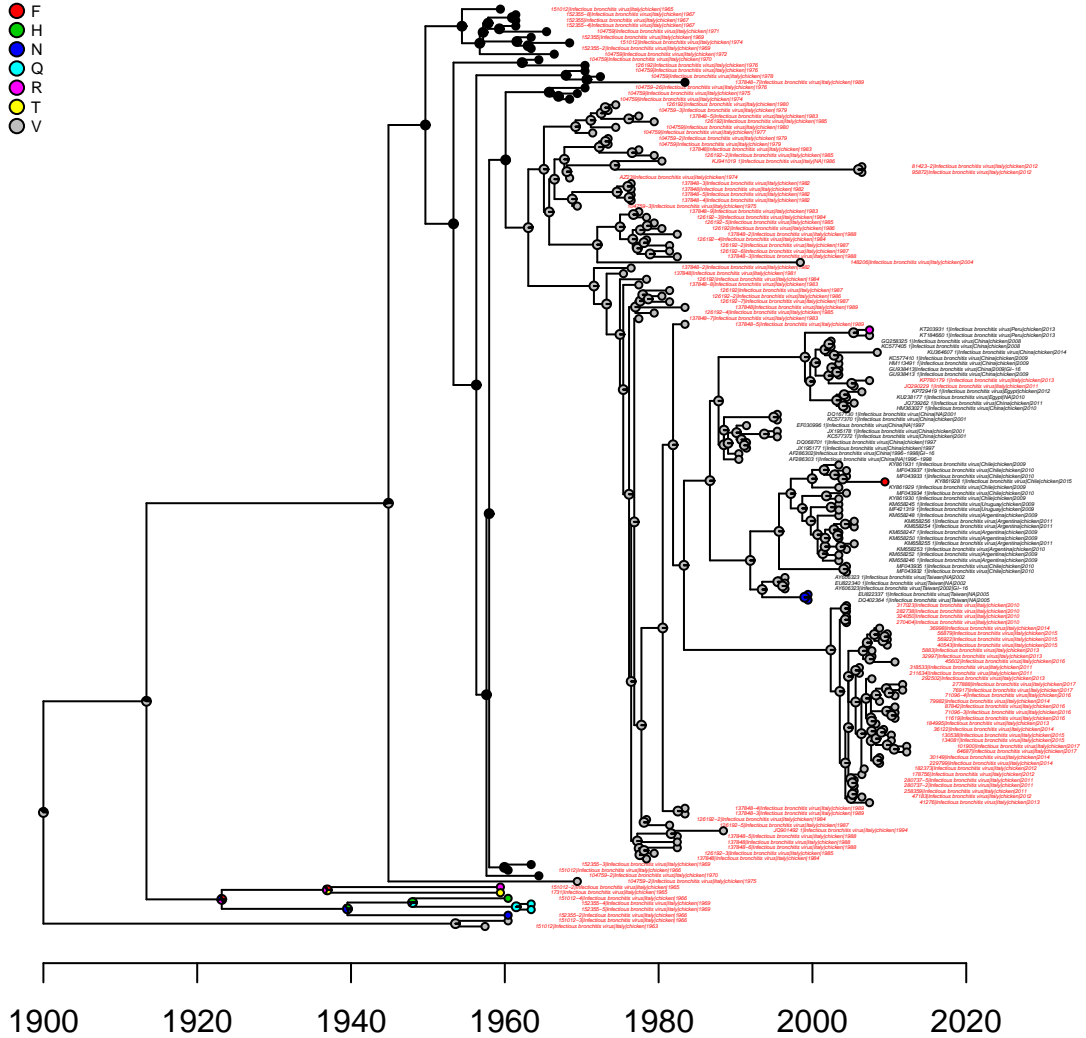

● L  
● R  
● S  
● V

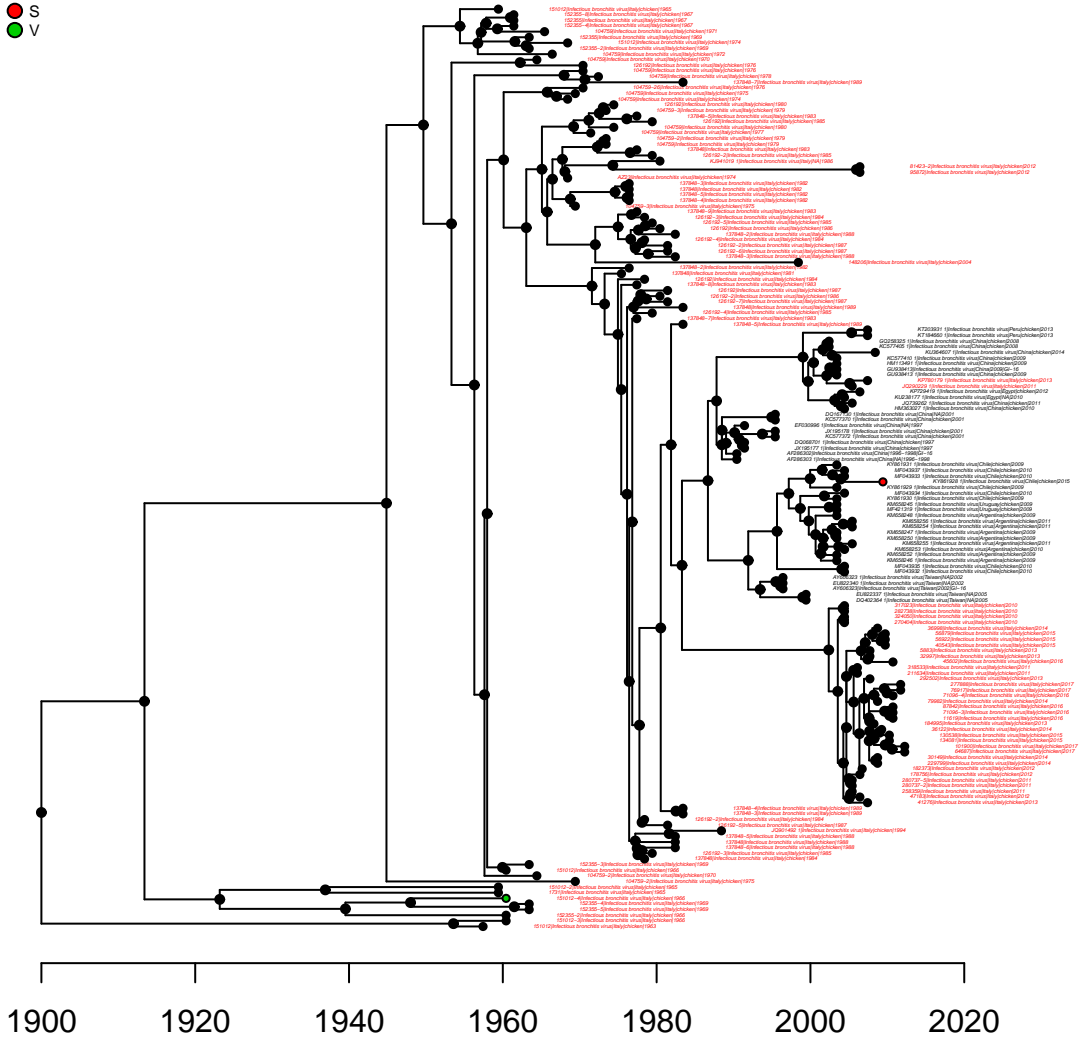

● F  
● H  
● Y

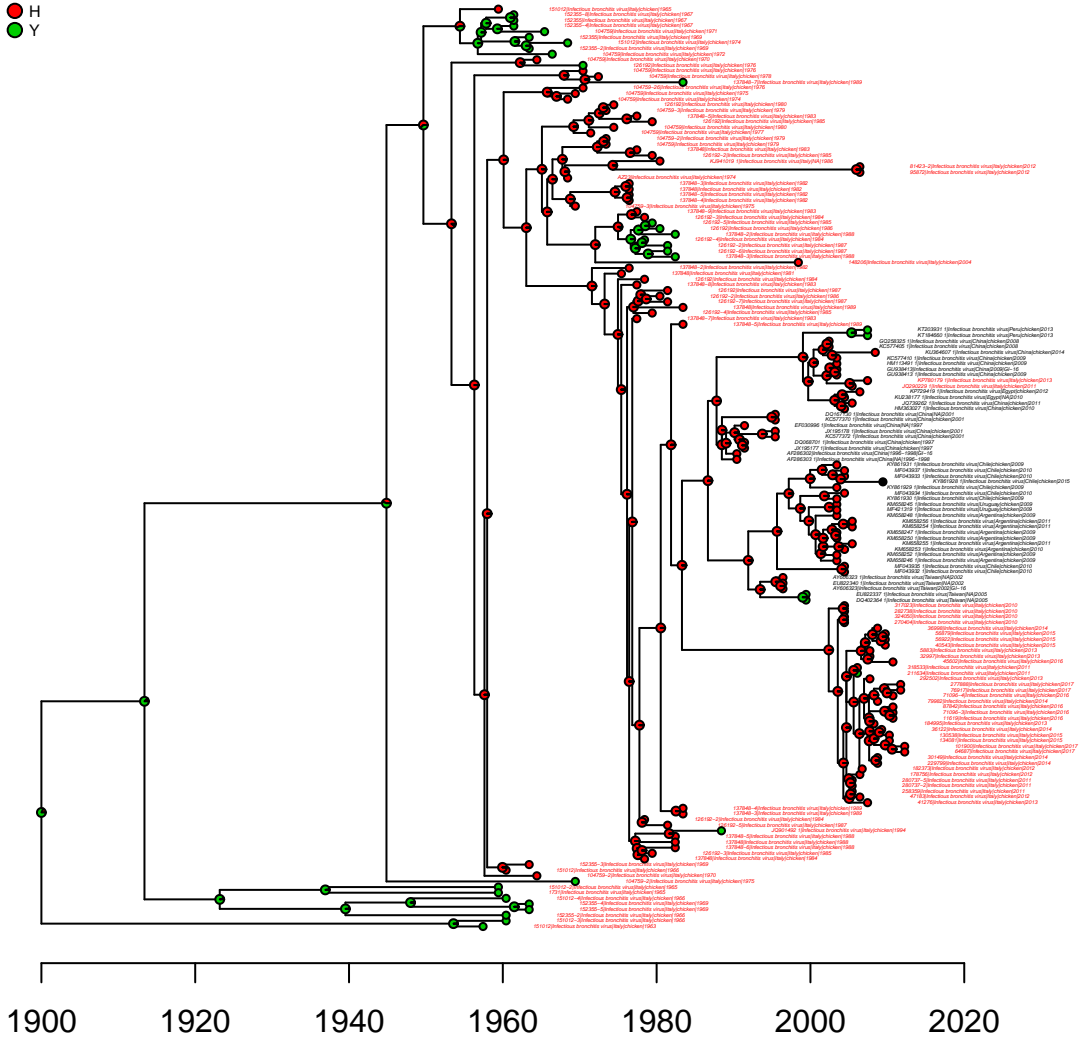

● K  
● Q

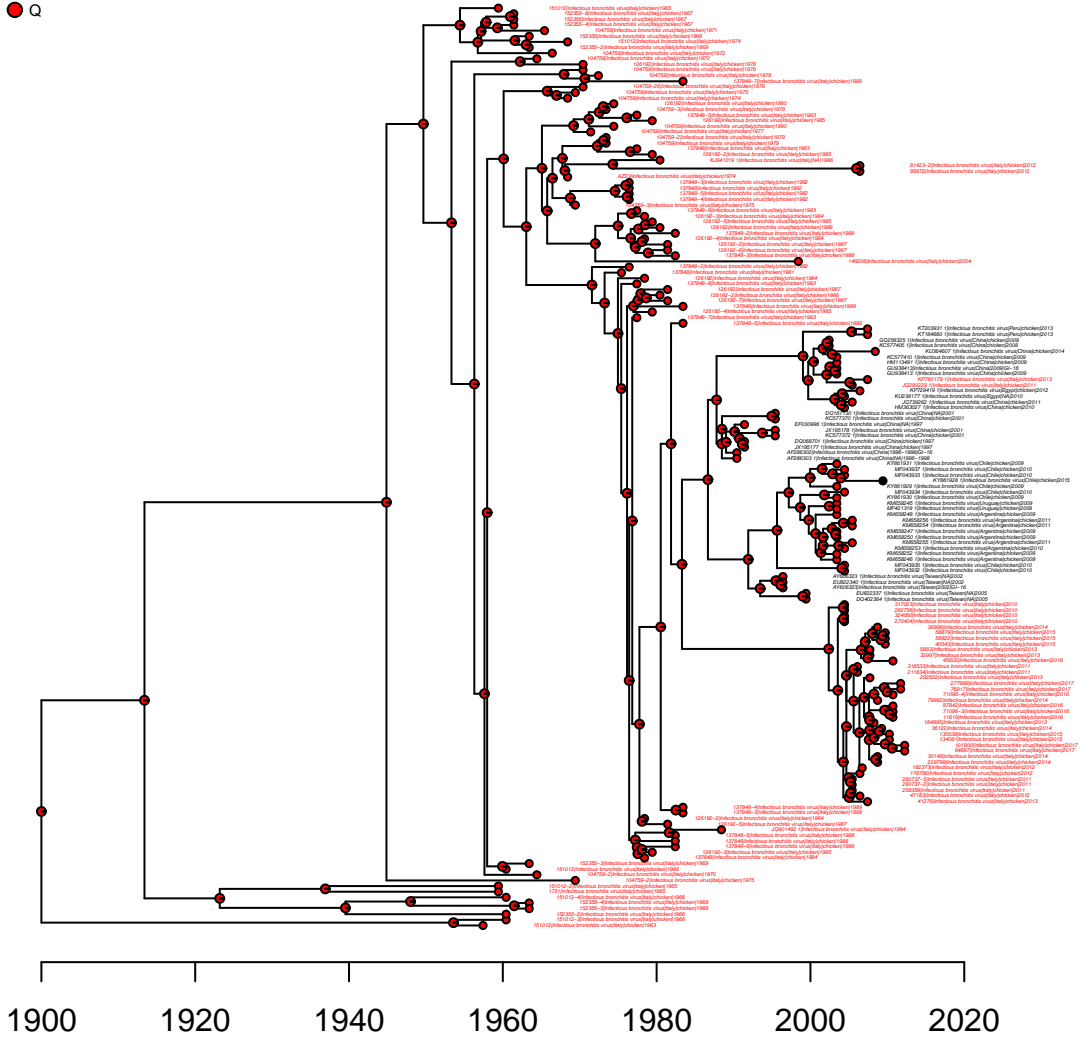





● K  
● Q

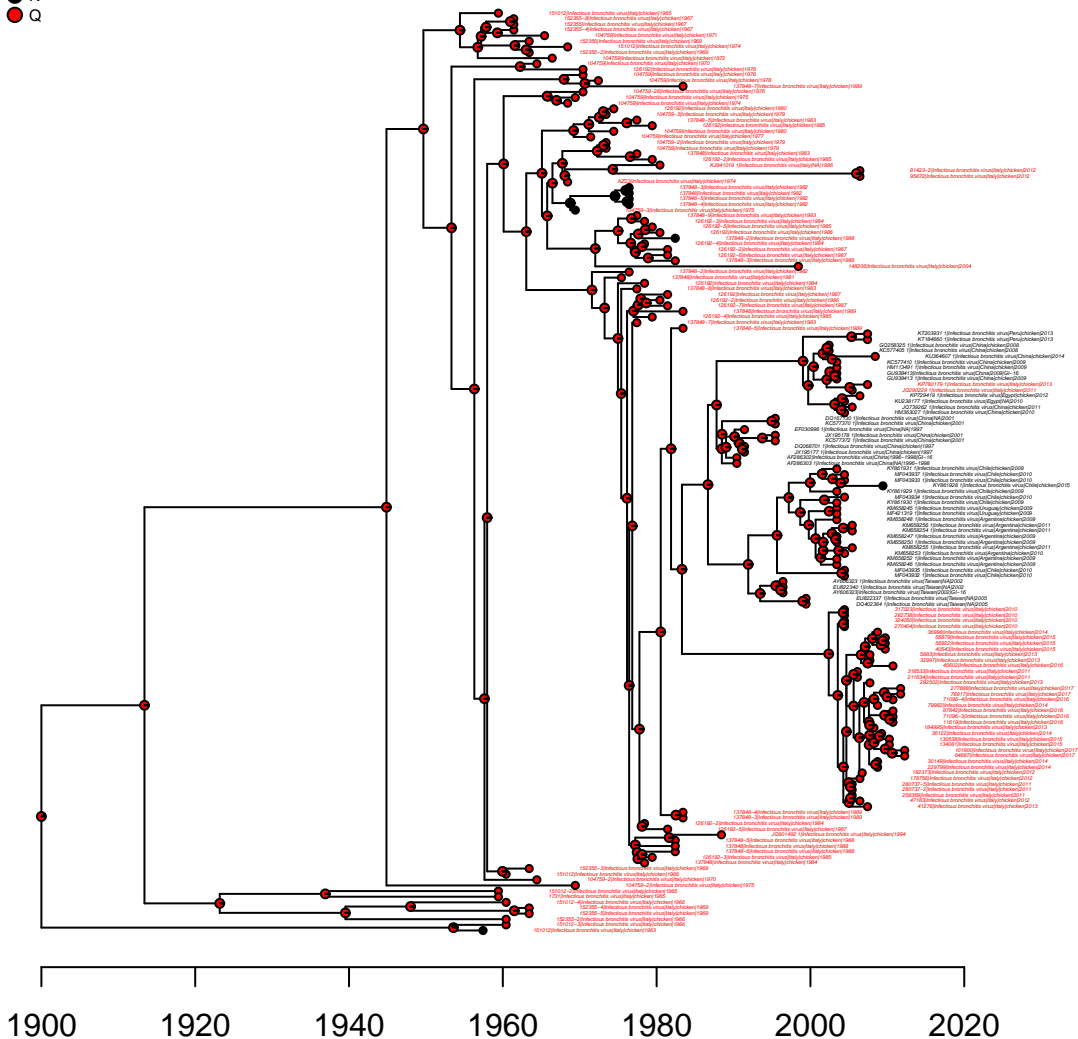

I  
P  
T

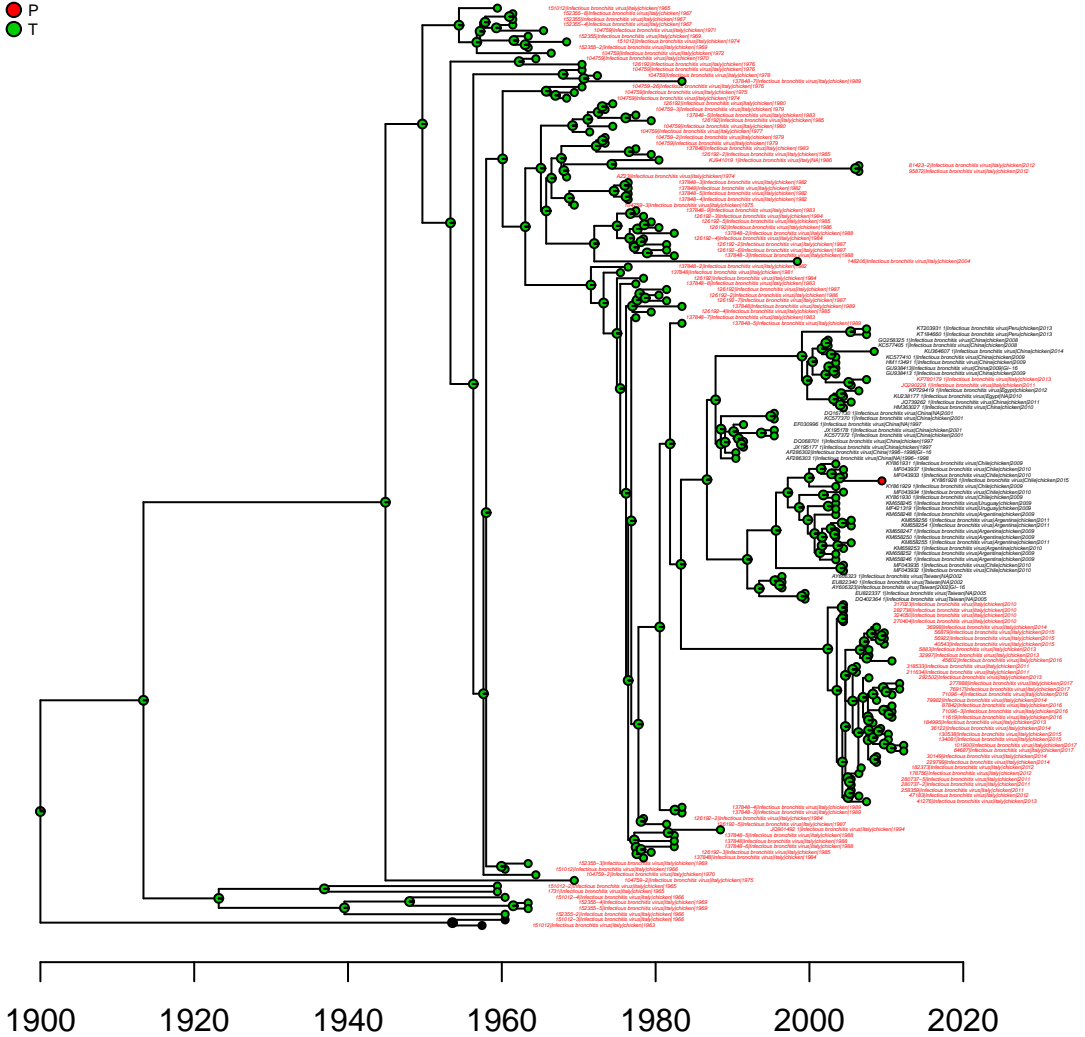

● A  
● S  
● T  
● V

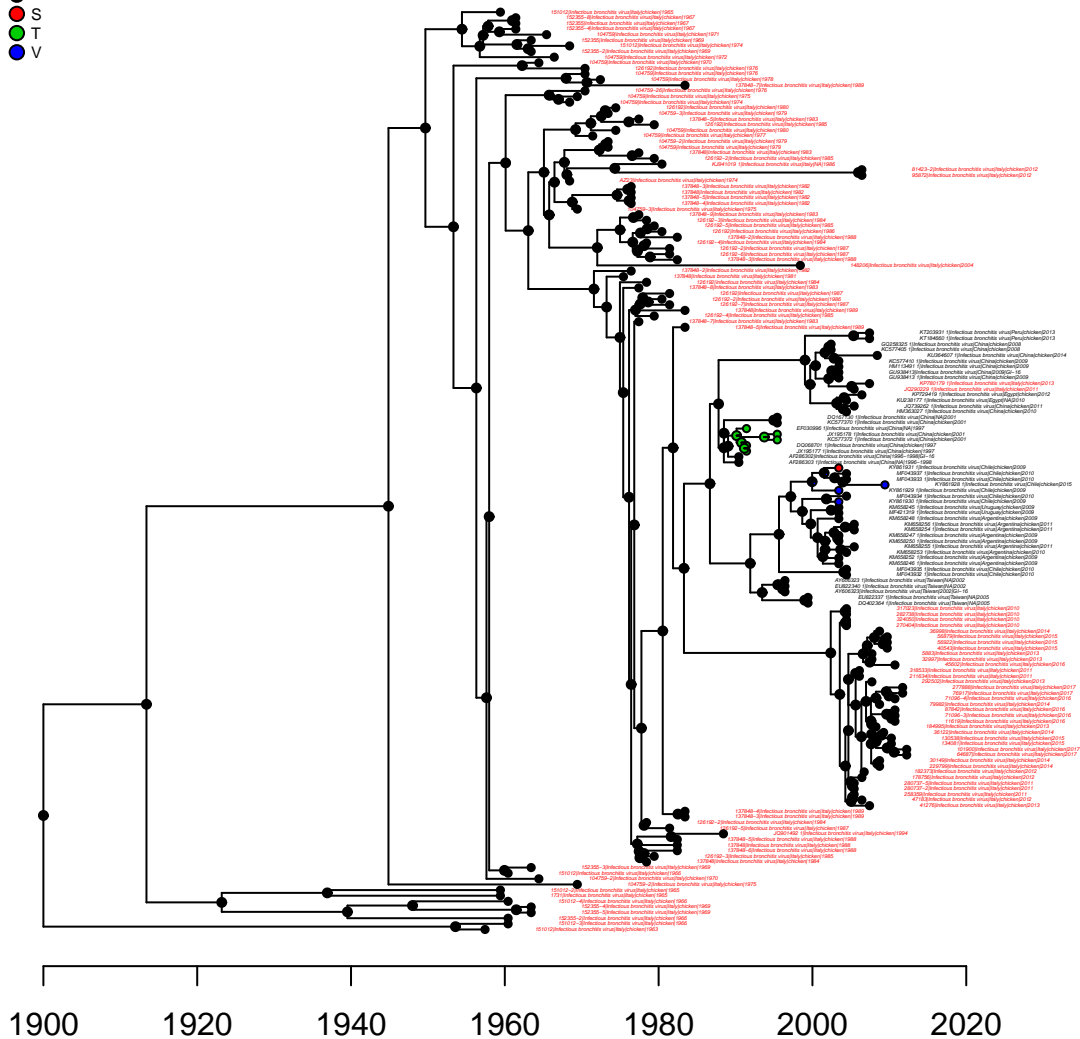

● Q  
● S

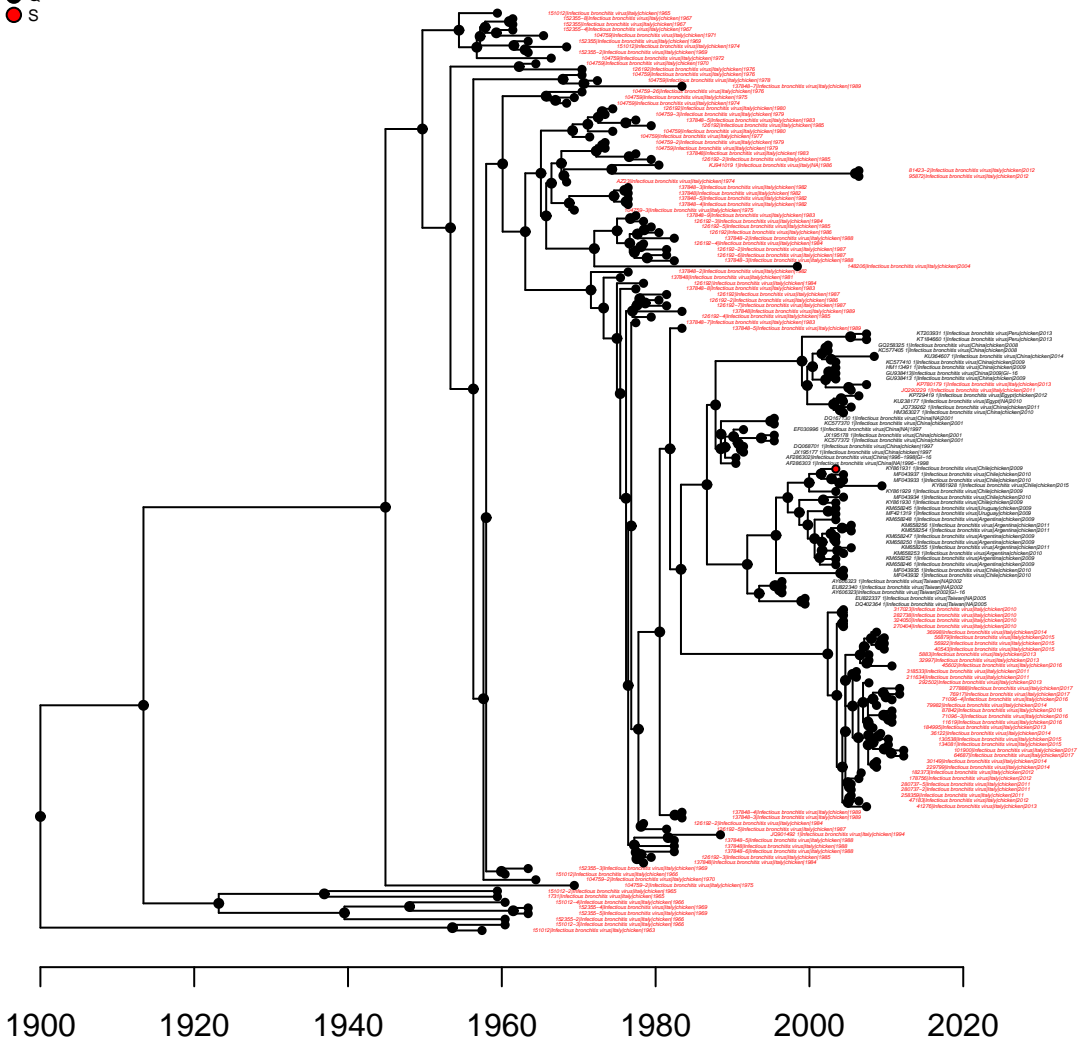

● C  
● X  
● Y

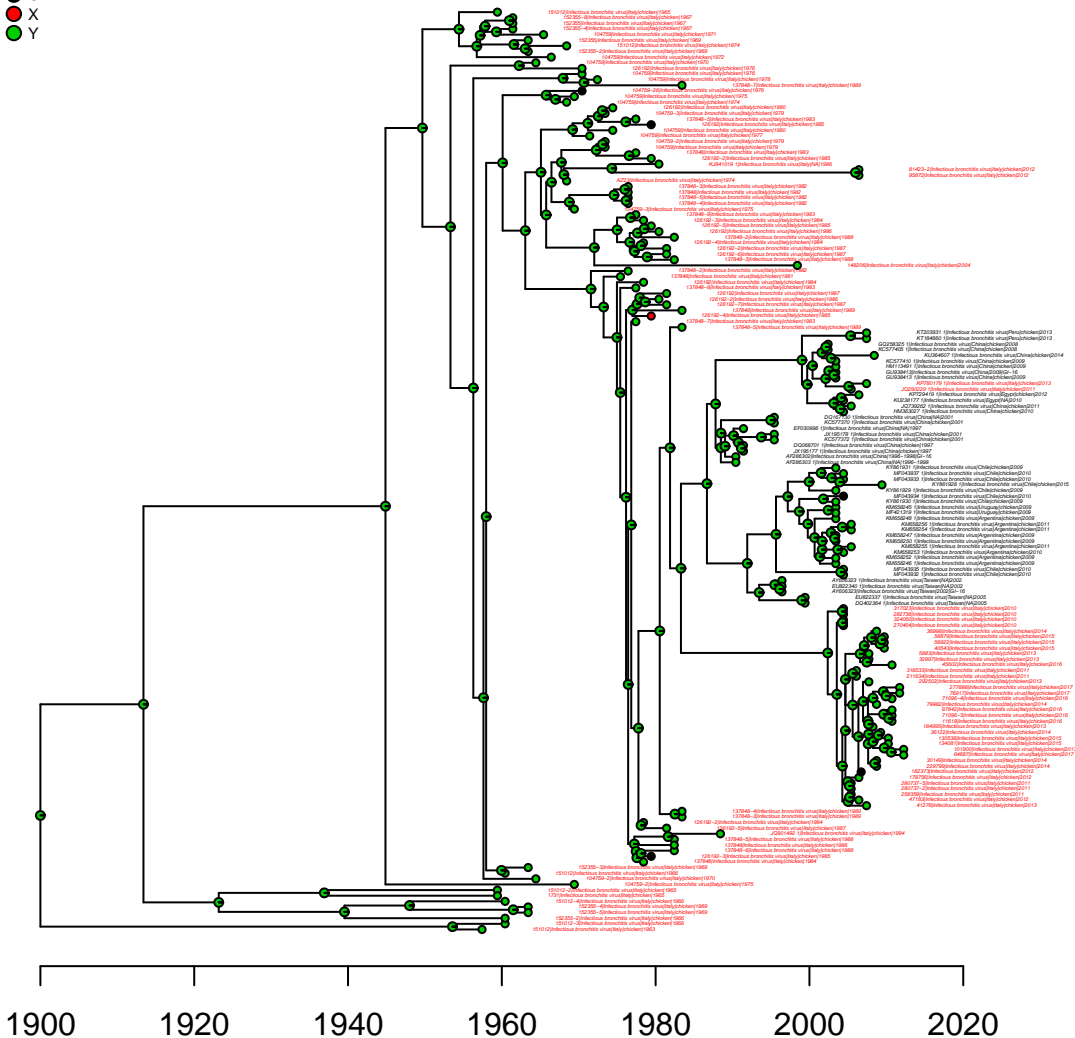

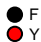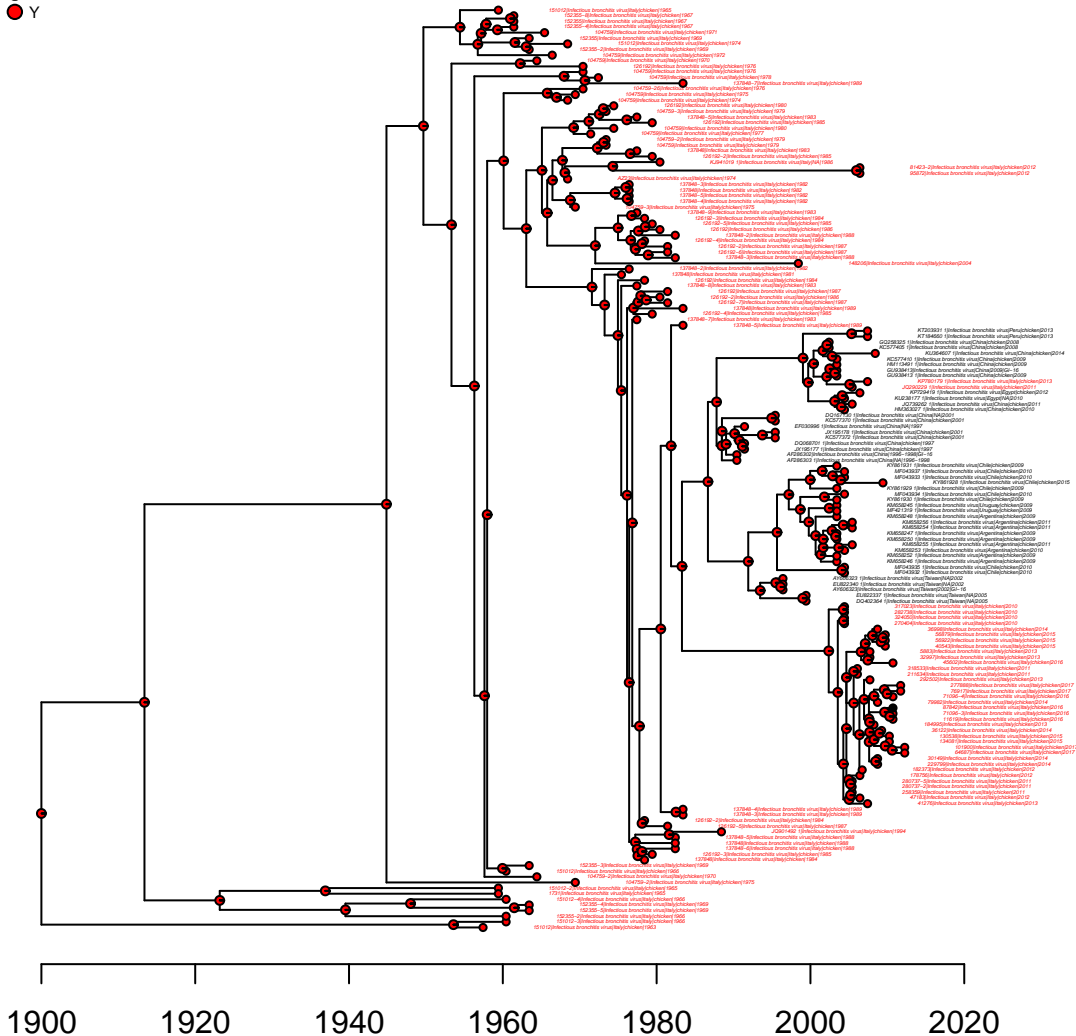

● F  
● L  
● R  
● Y

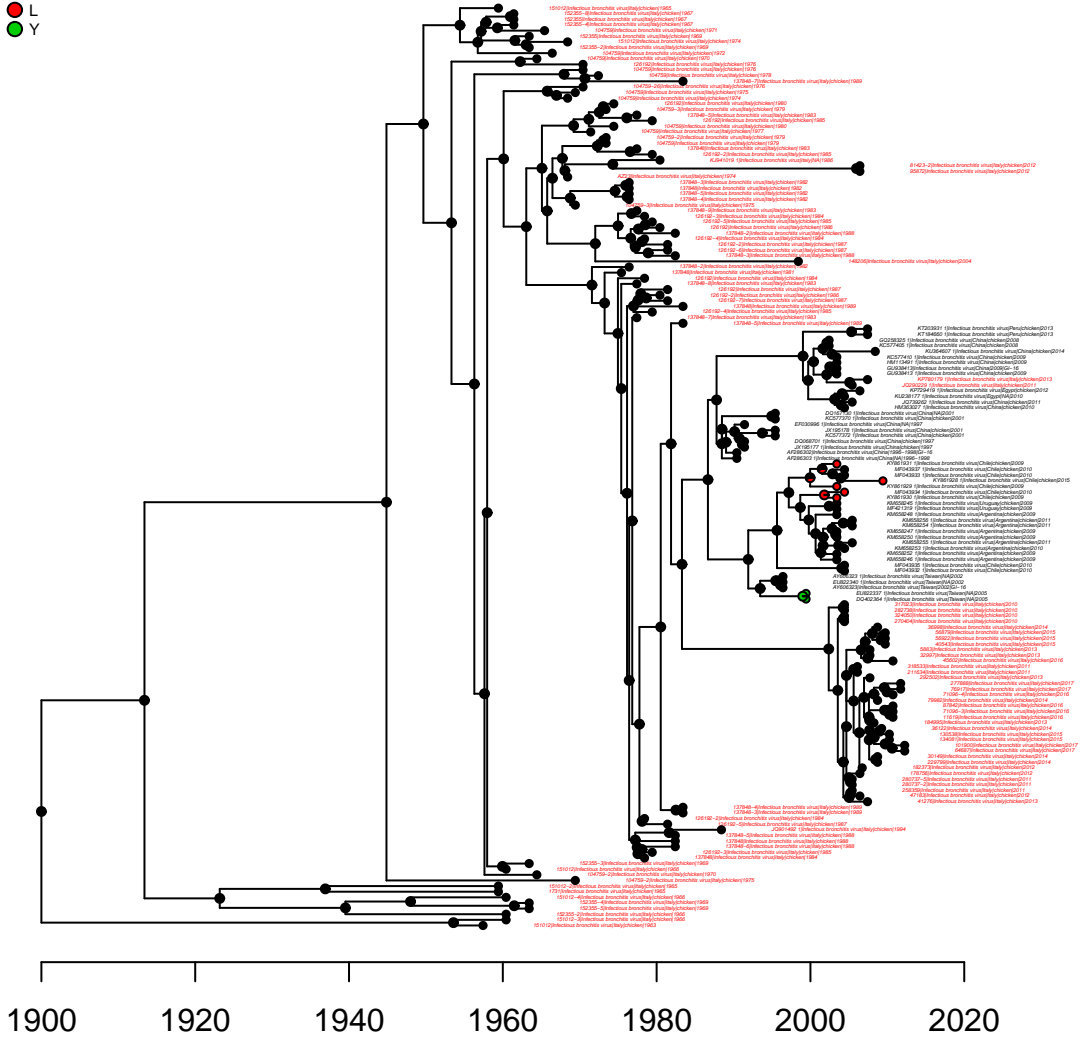

● F  
● L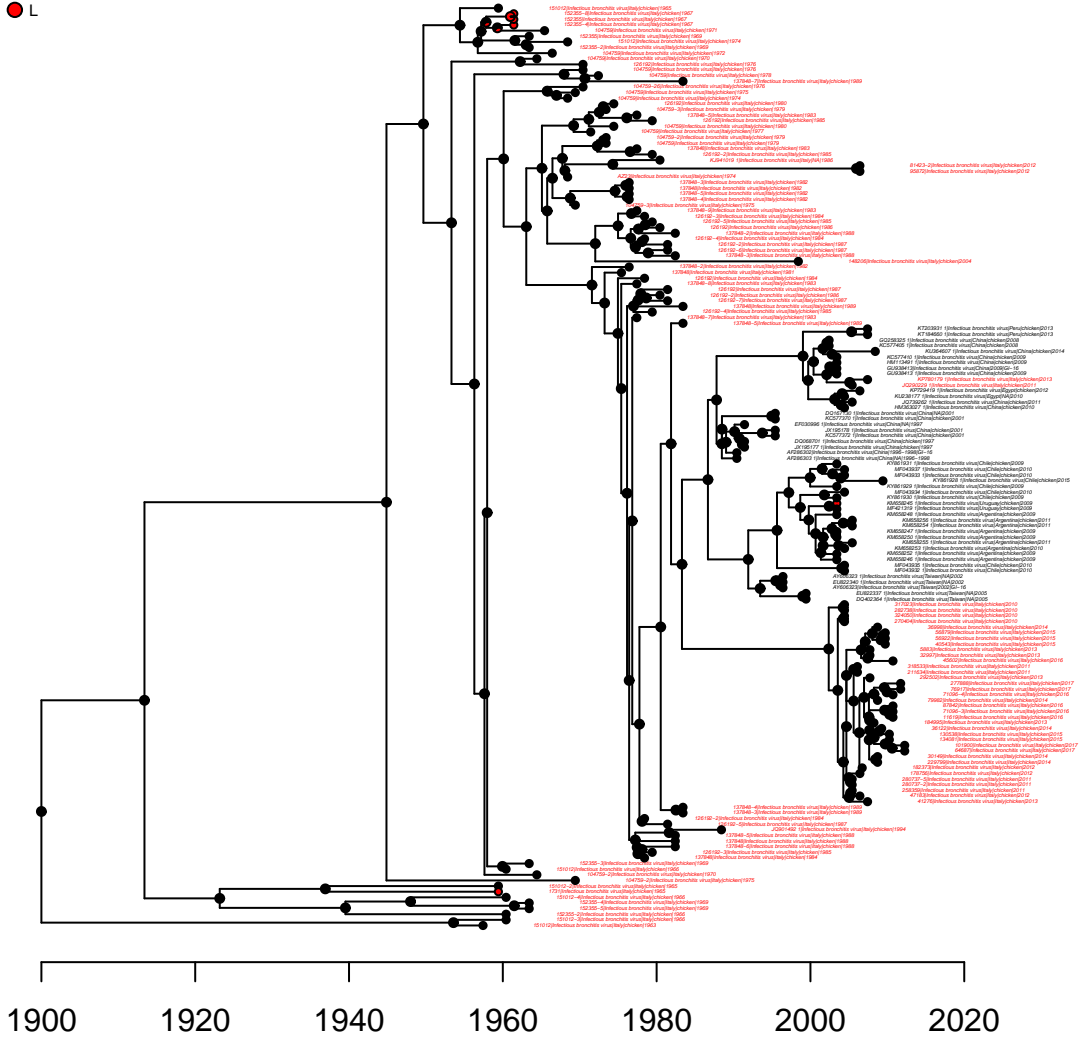





● G  
● R  
● N  
● S

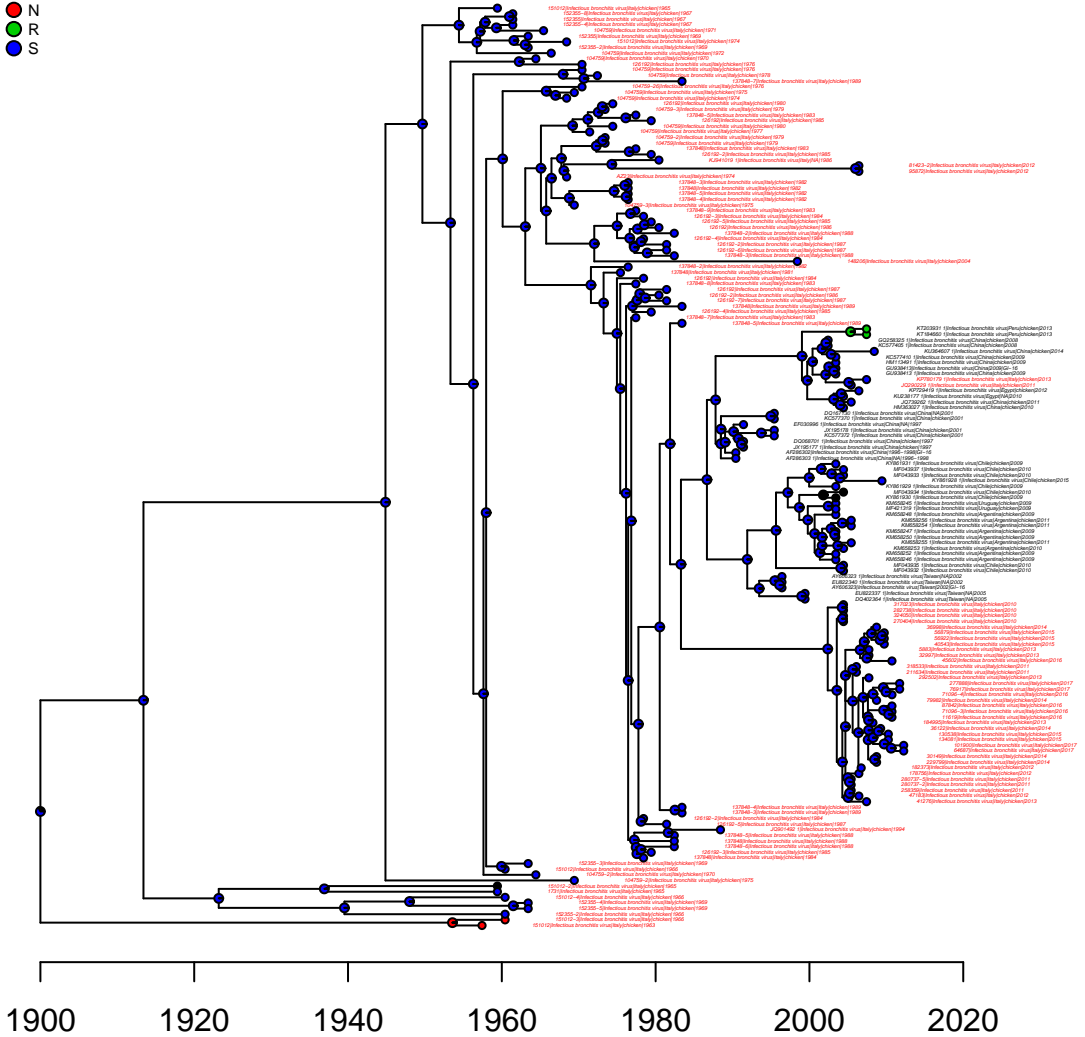

● C  
● R  
● H  
● V

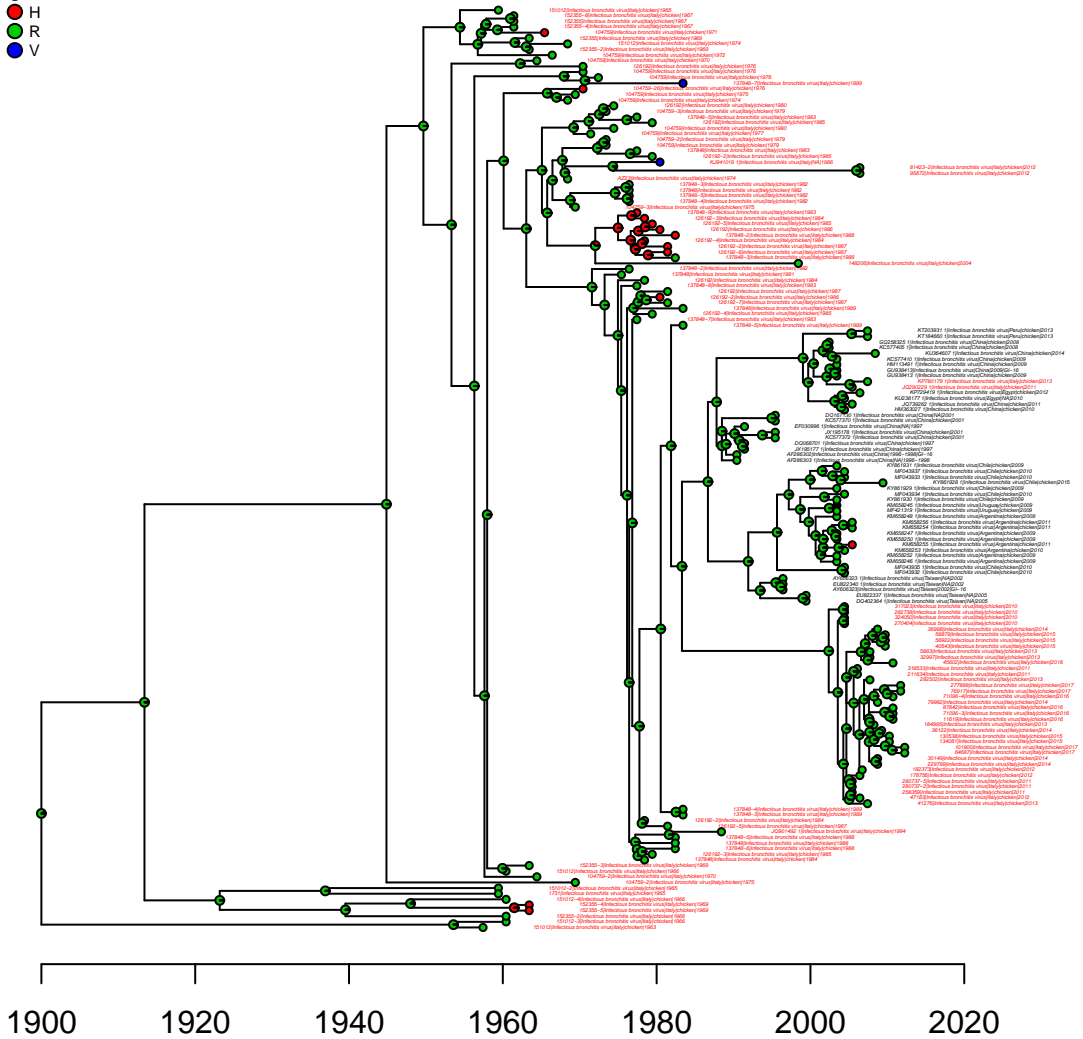



● D  
 ● E  
 ● G  
 ● K  
 ● Q

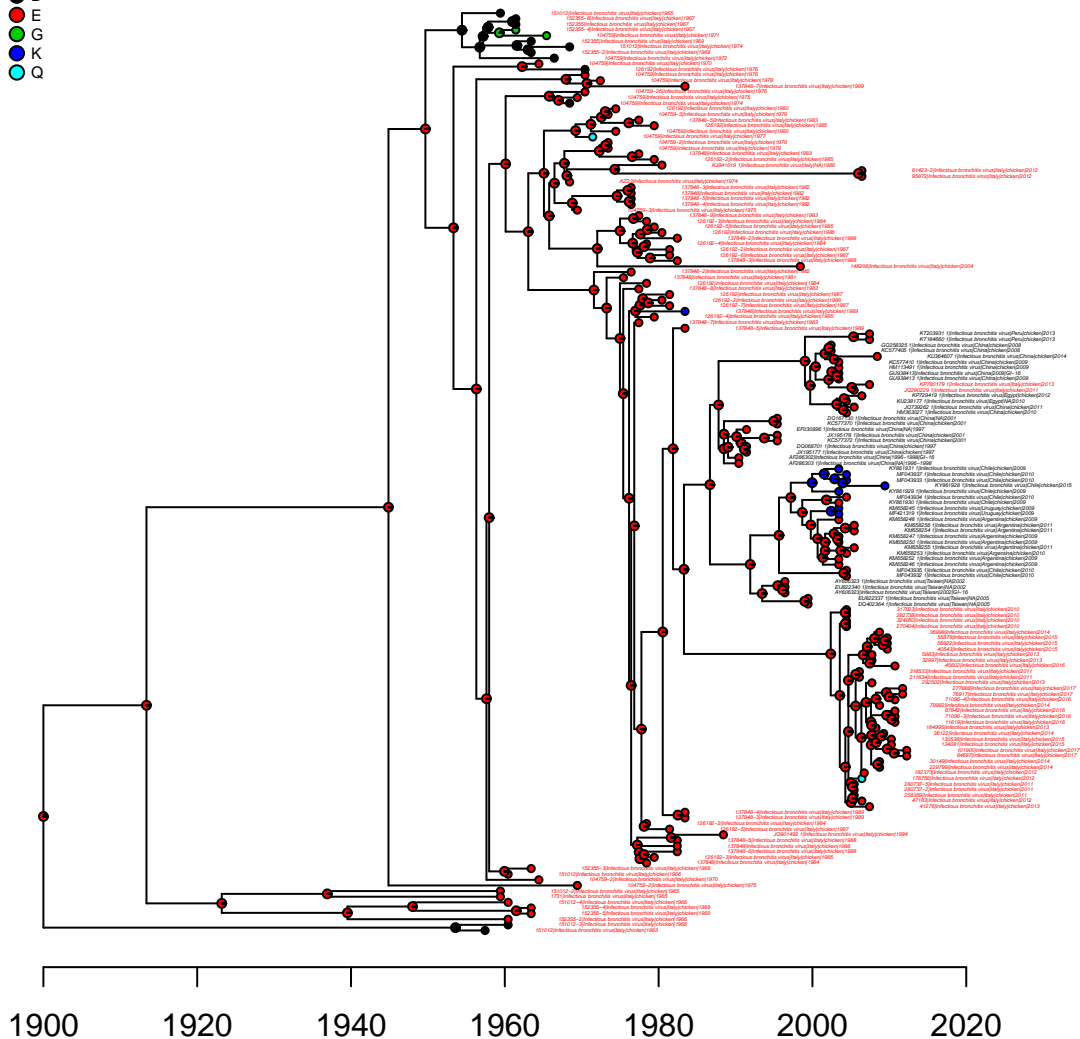

● D  
● R  
● N  
● X  
● Y

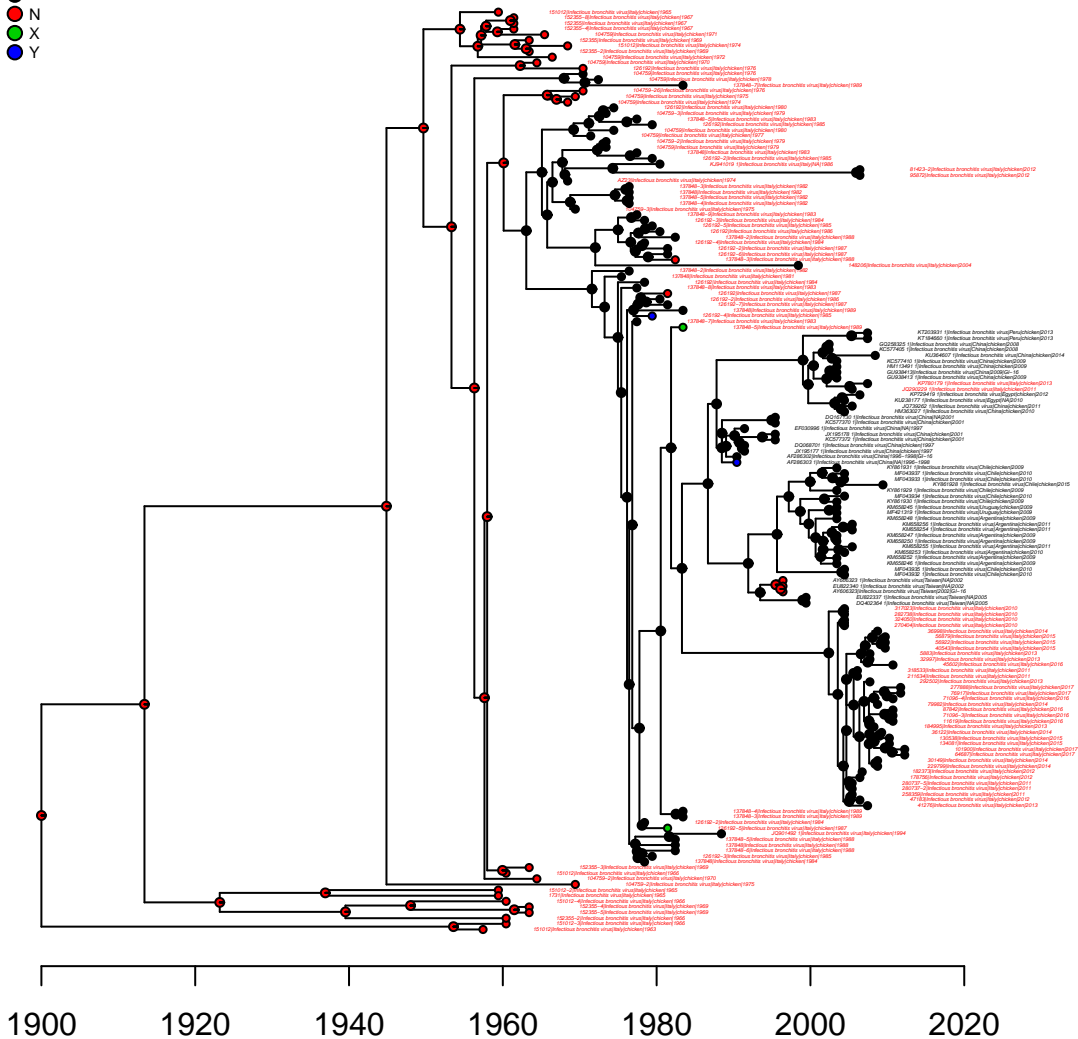

● F  
● X  
● Y

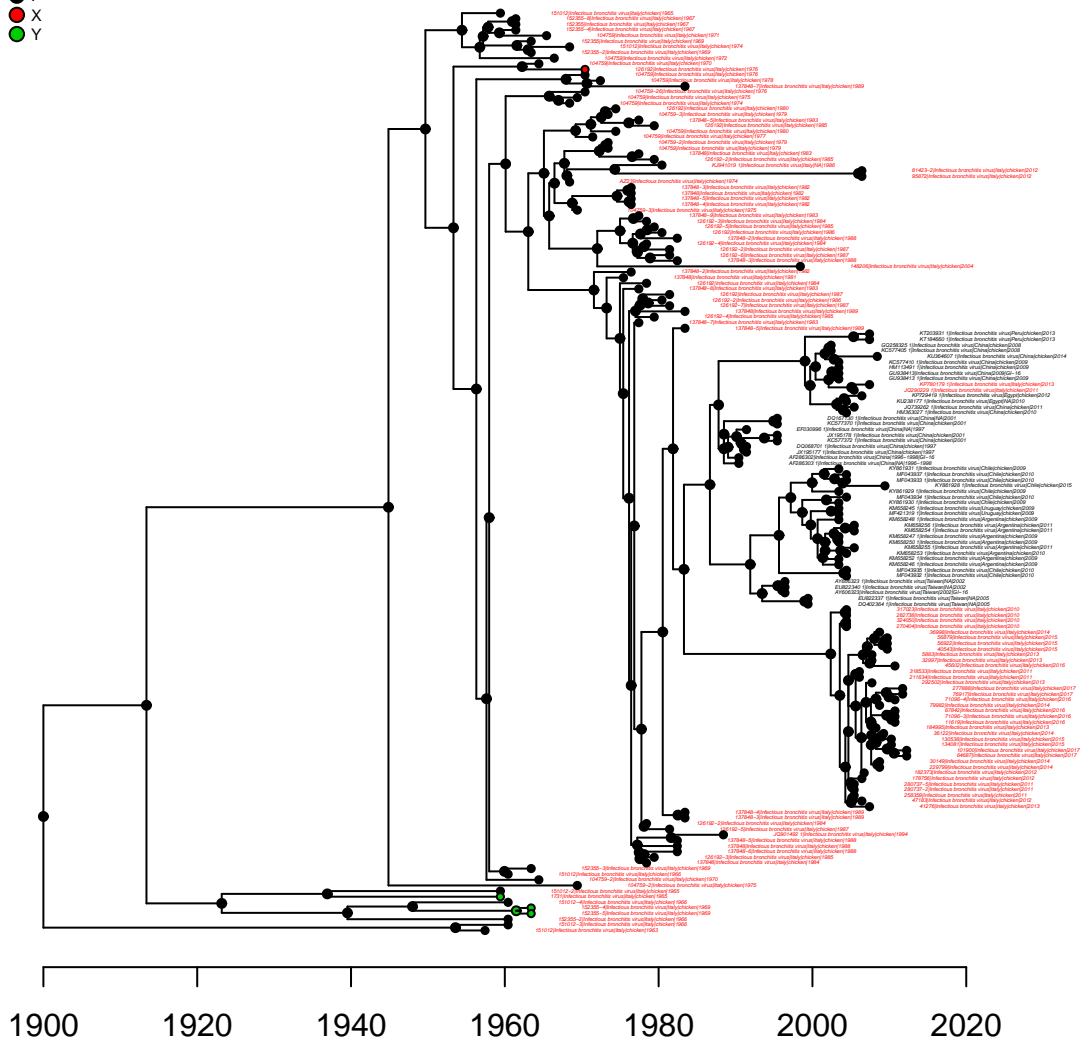

● K  
● R  
● L  
● M  
● T  
● X

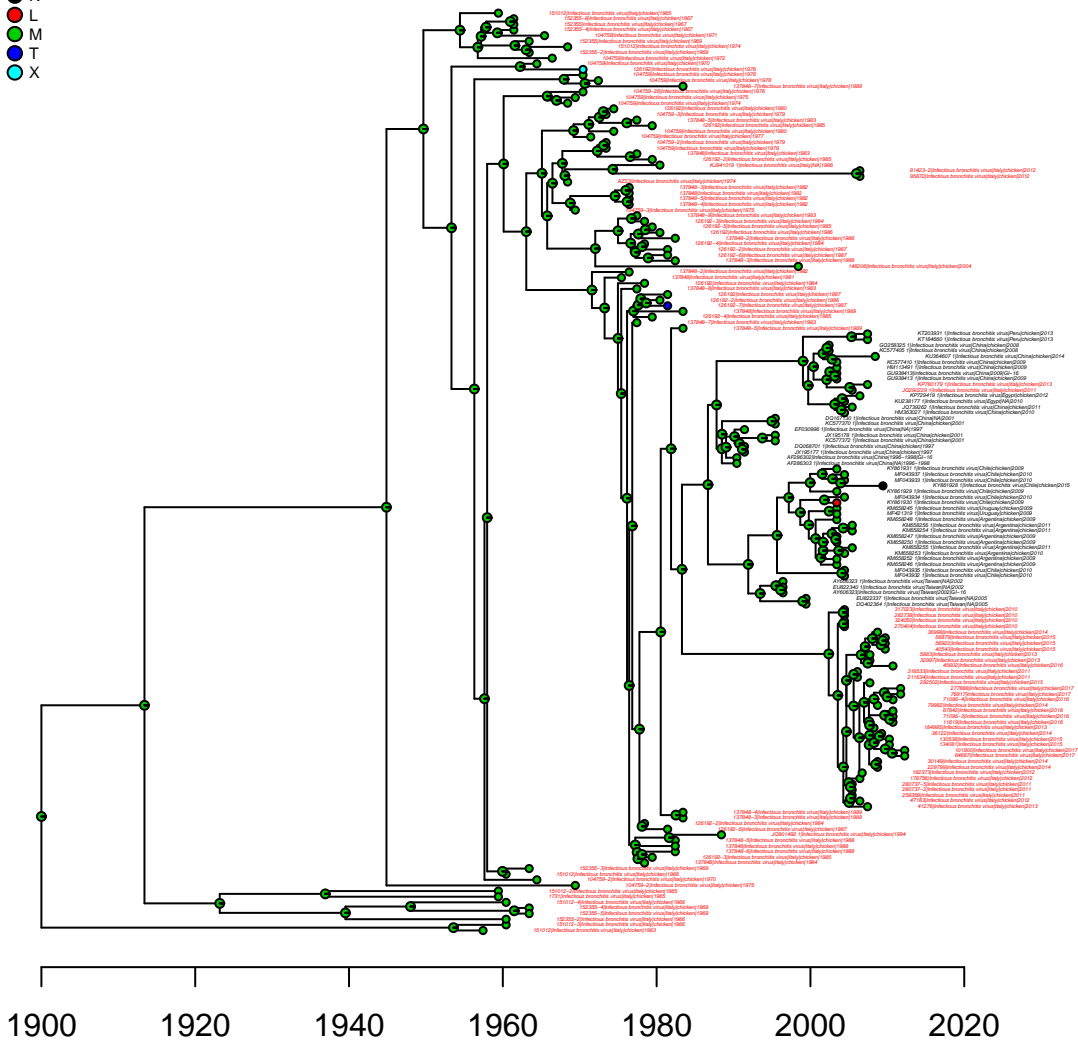



● F  
● X  
● Y

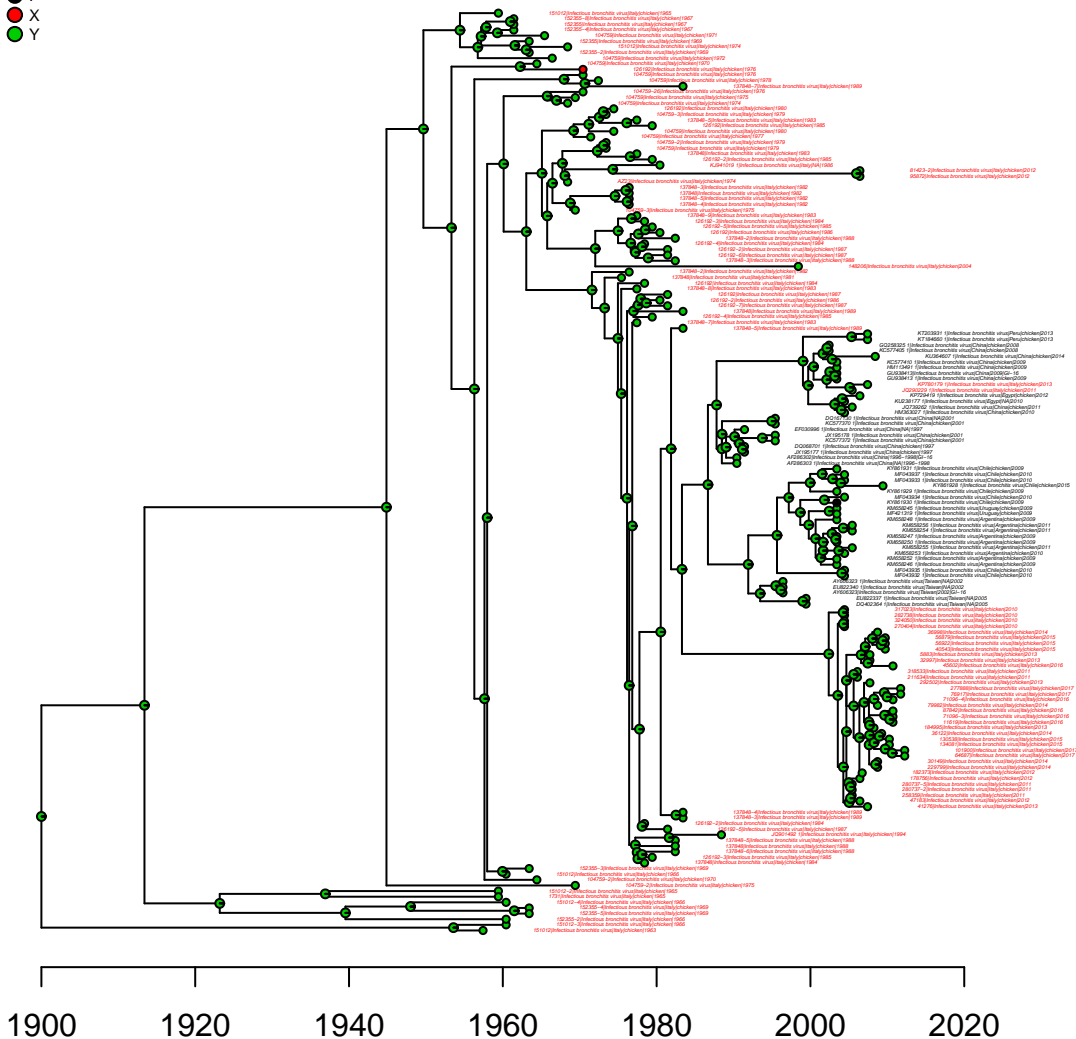

● G  
● X

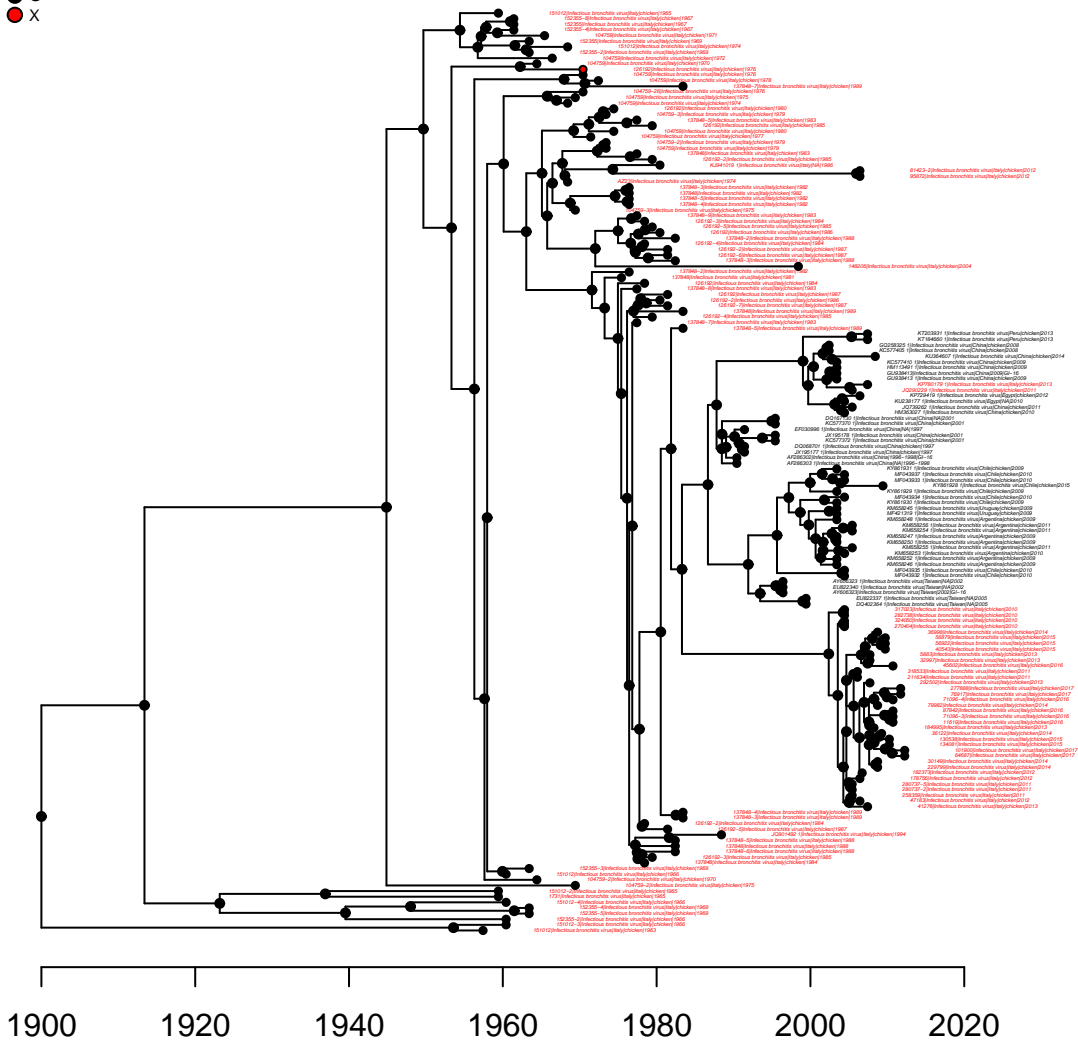

● S  
● X

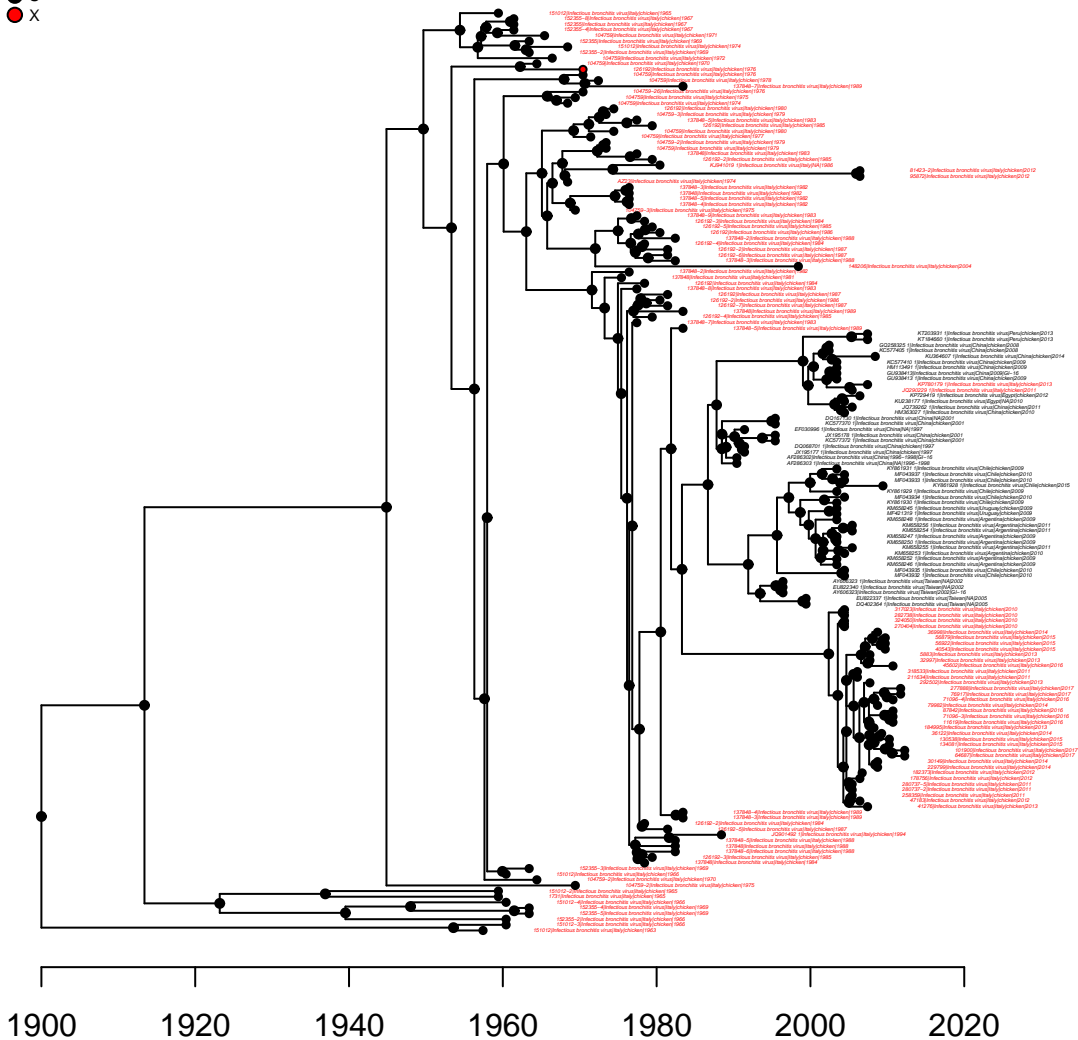

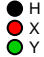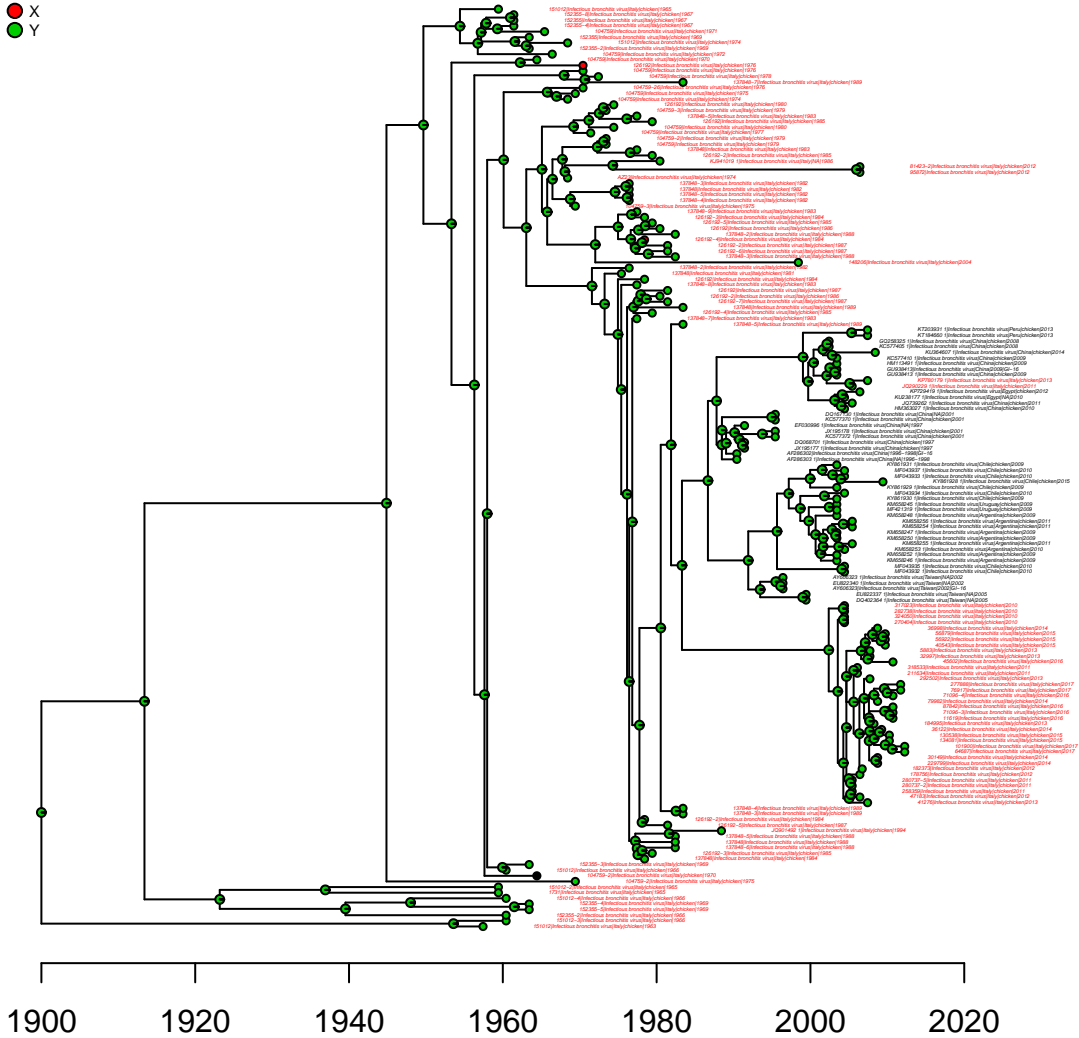

● H  
● P  
● X

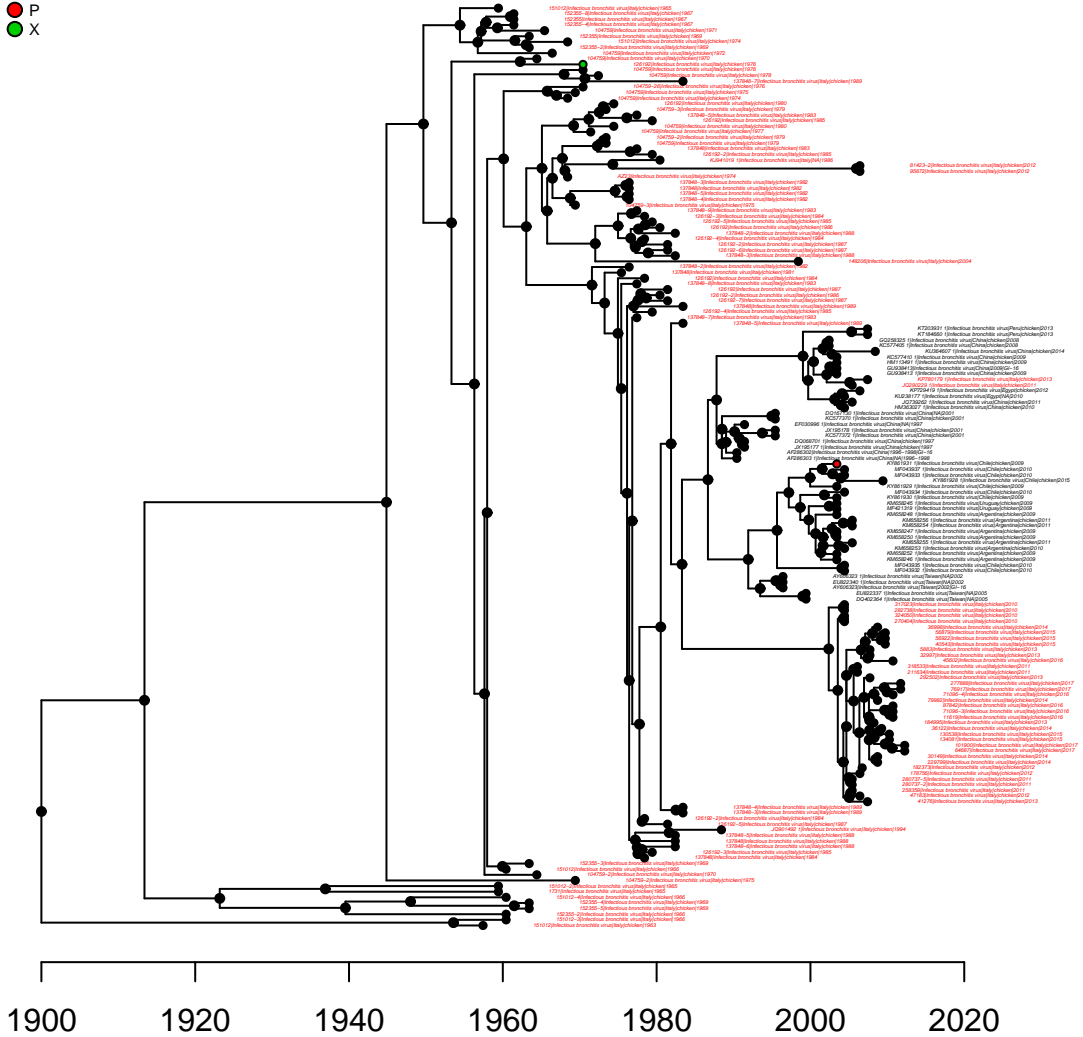

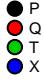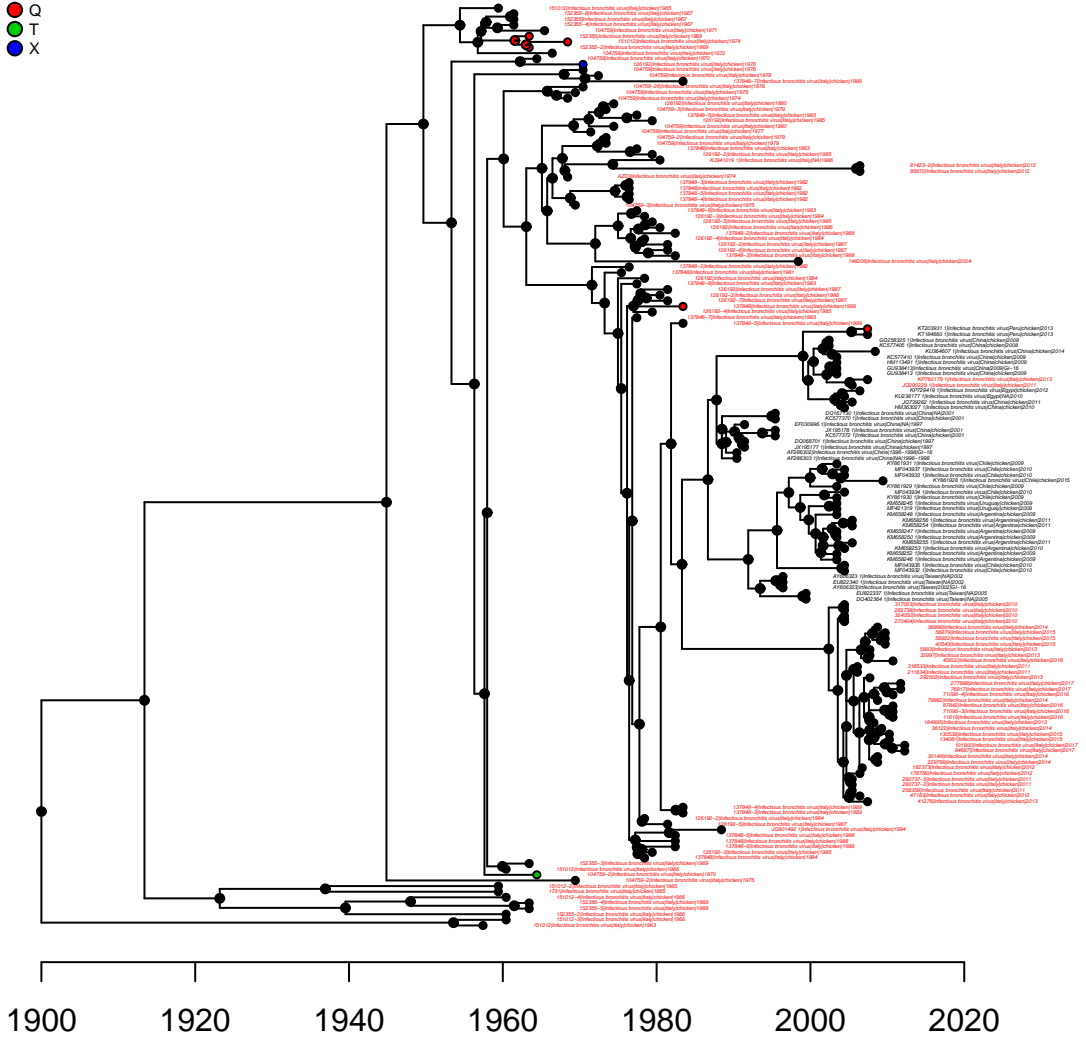



● C  
● X

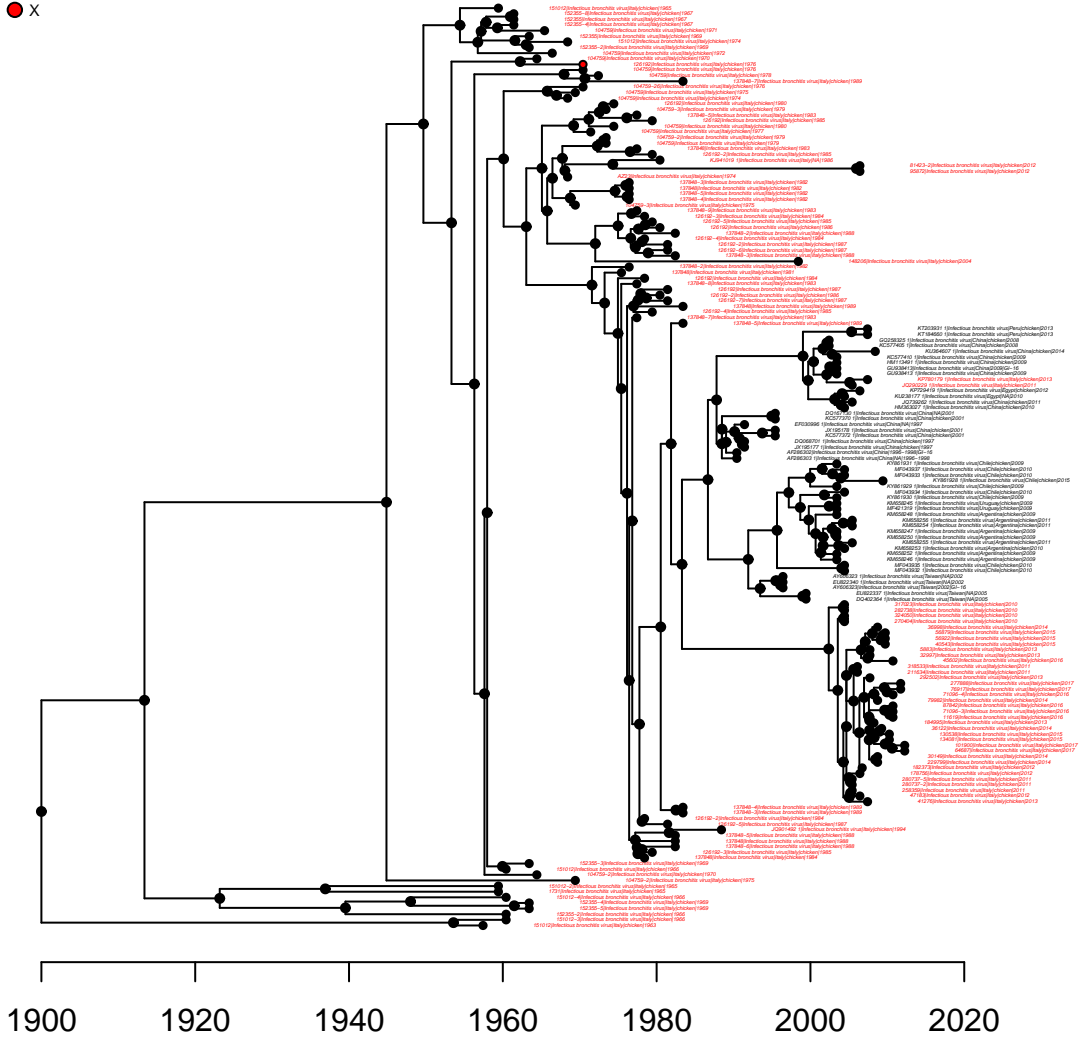



- K
- R
- L
- N
- P
- Q
- S
- X

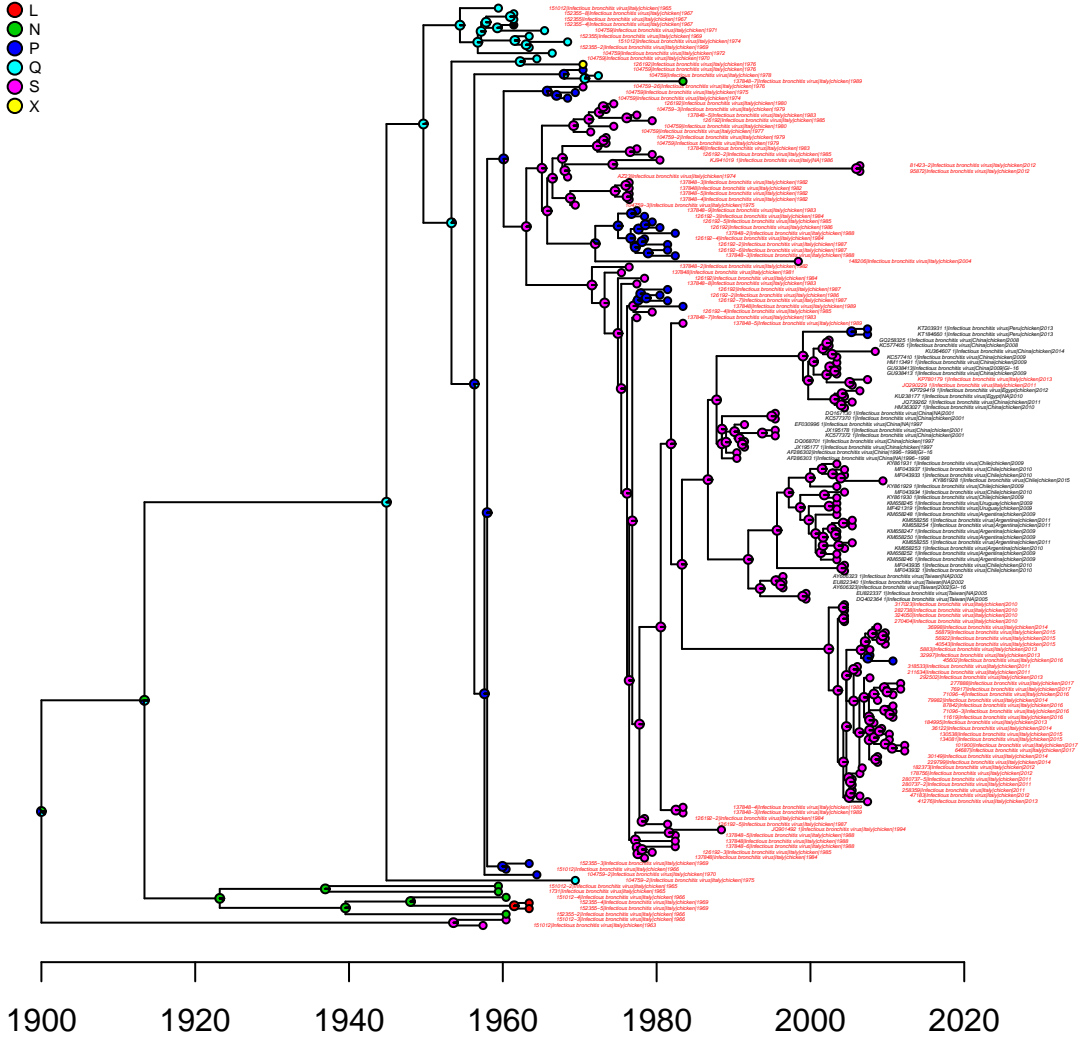

● F  
● X

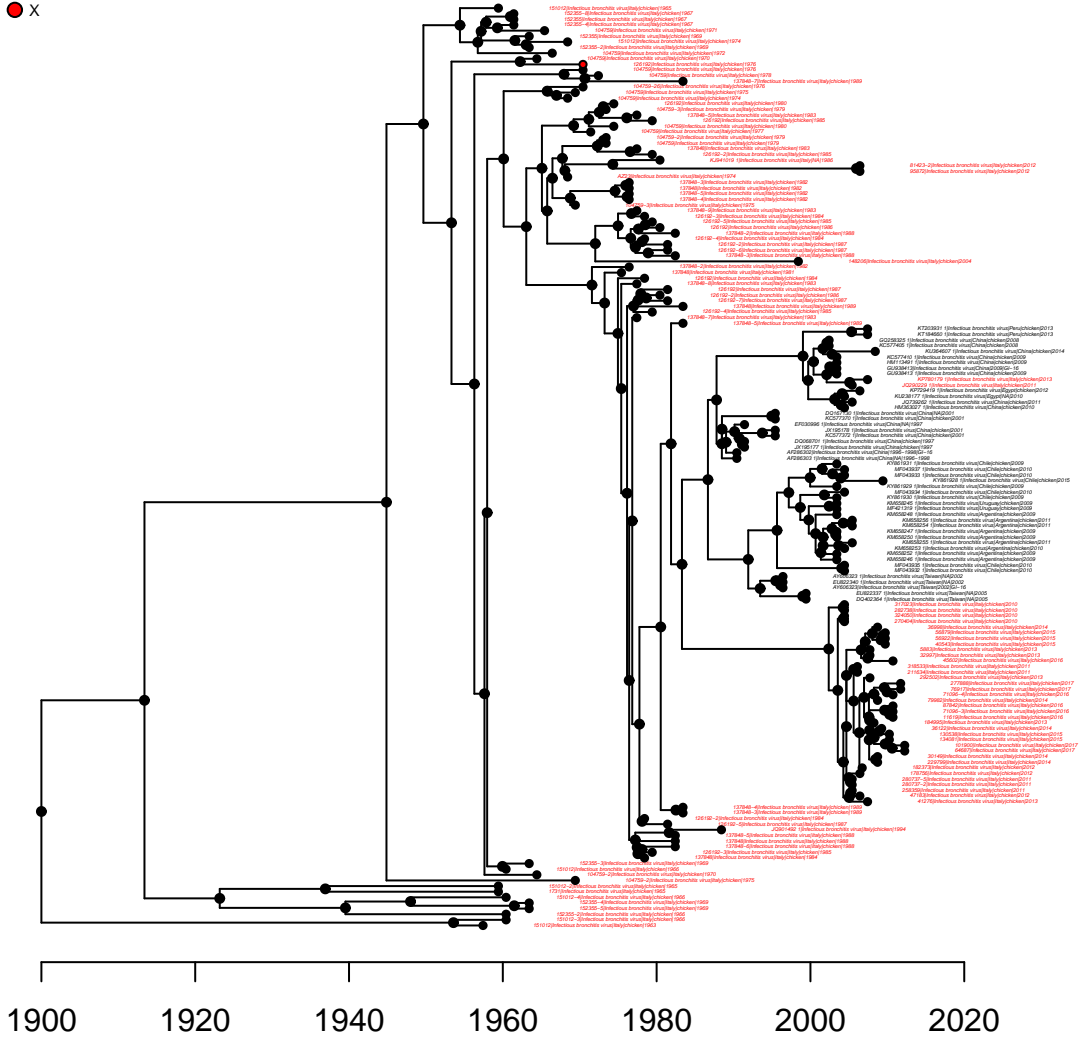



● L  
● P  
● X

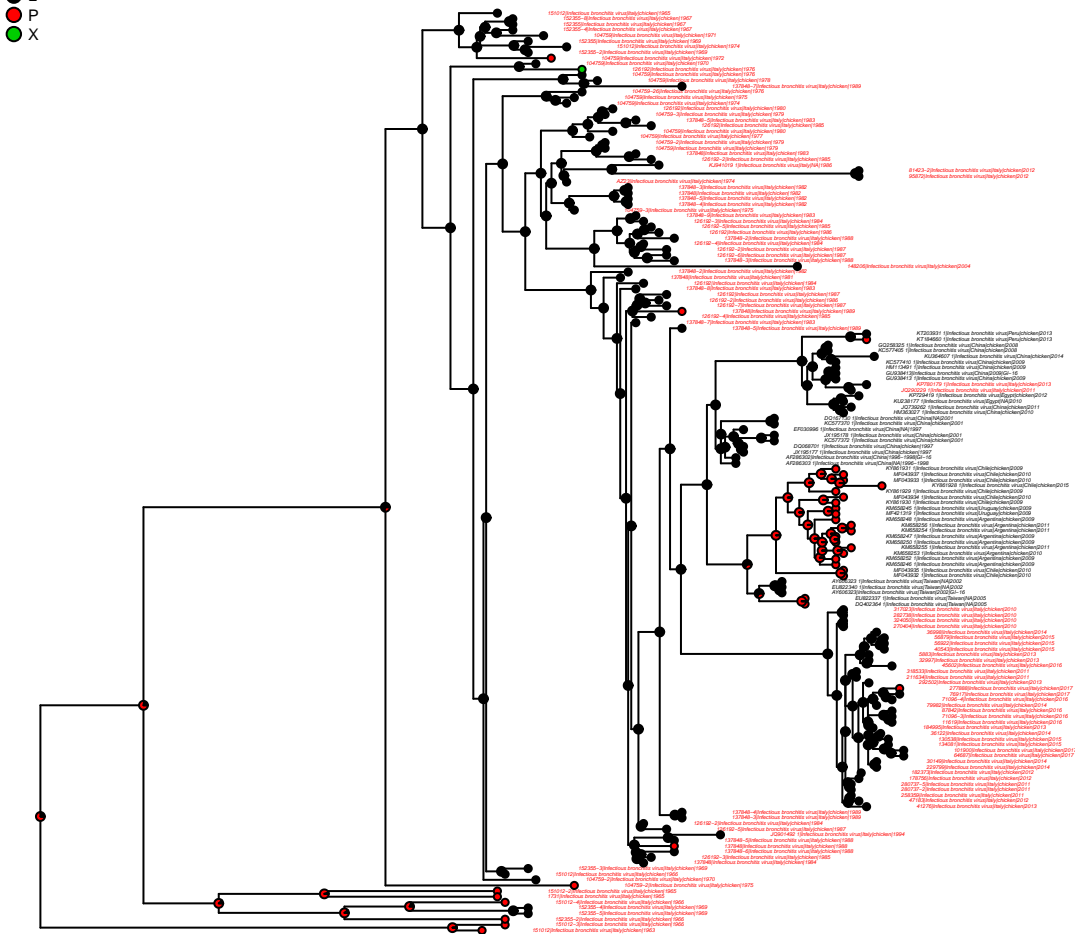

1900 1920 1940 1960 1980 2000 2020



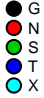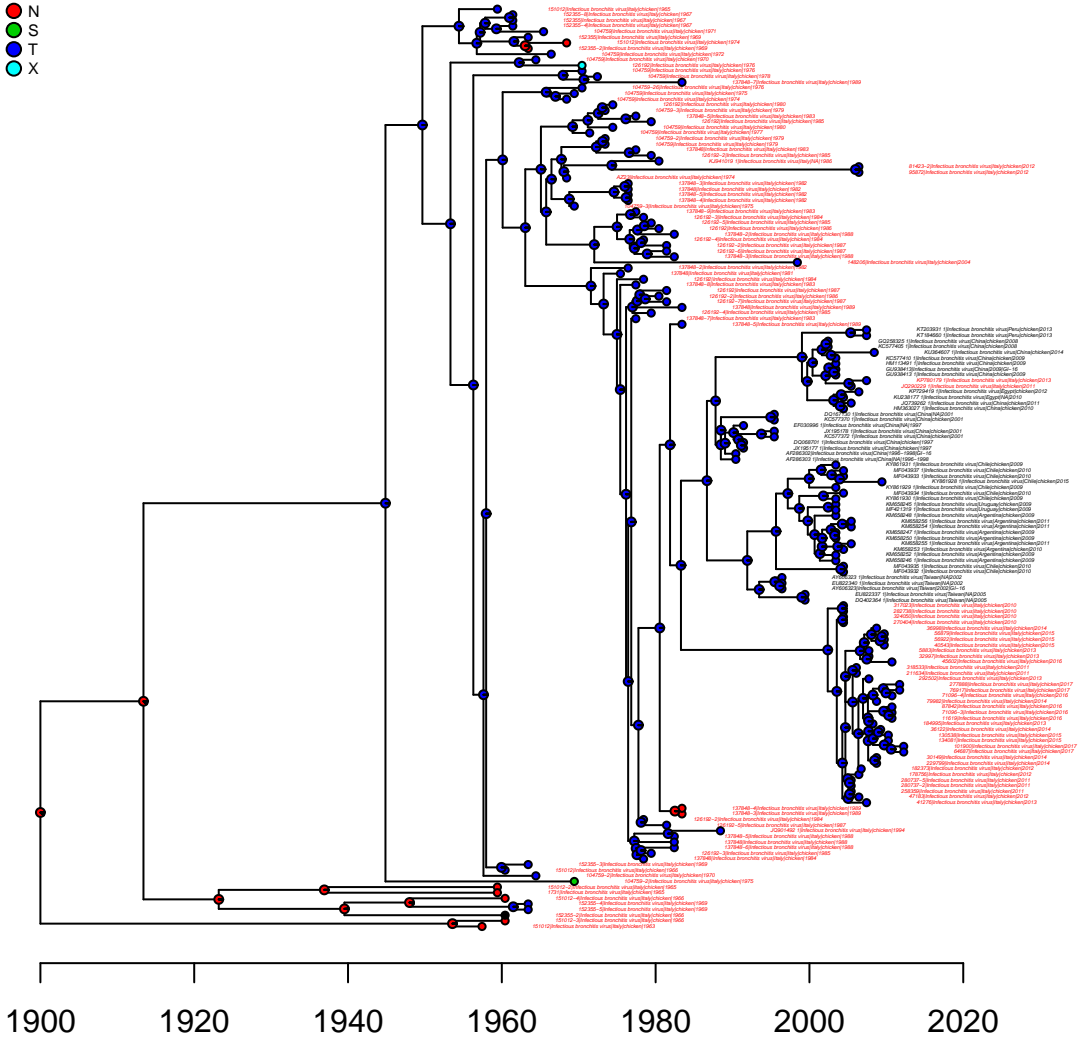

● I  
● L  
● R  
● X

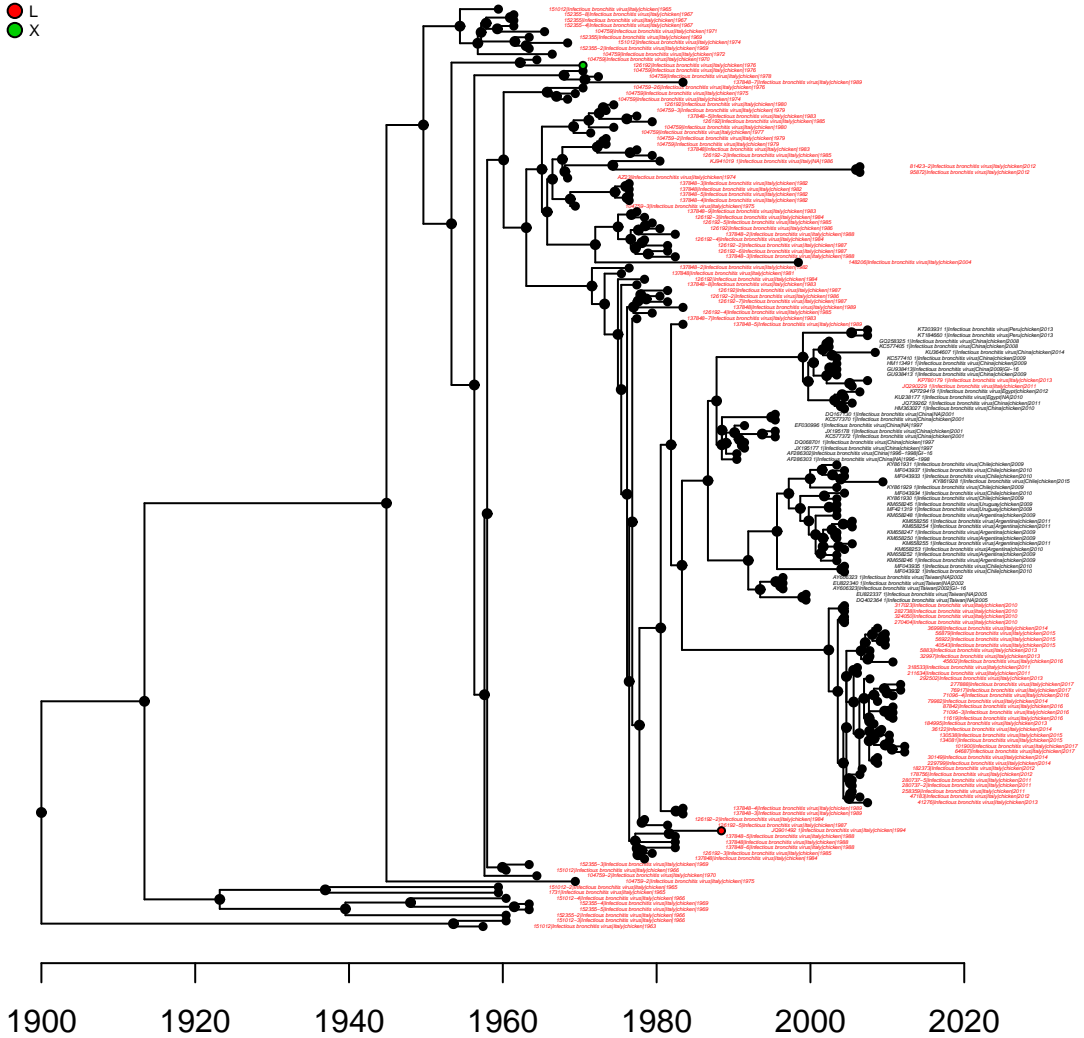









- F
- L
- W
- X

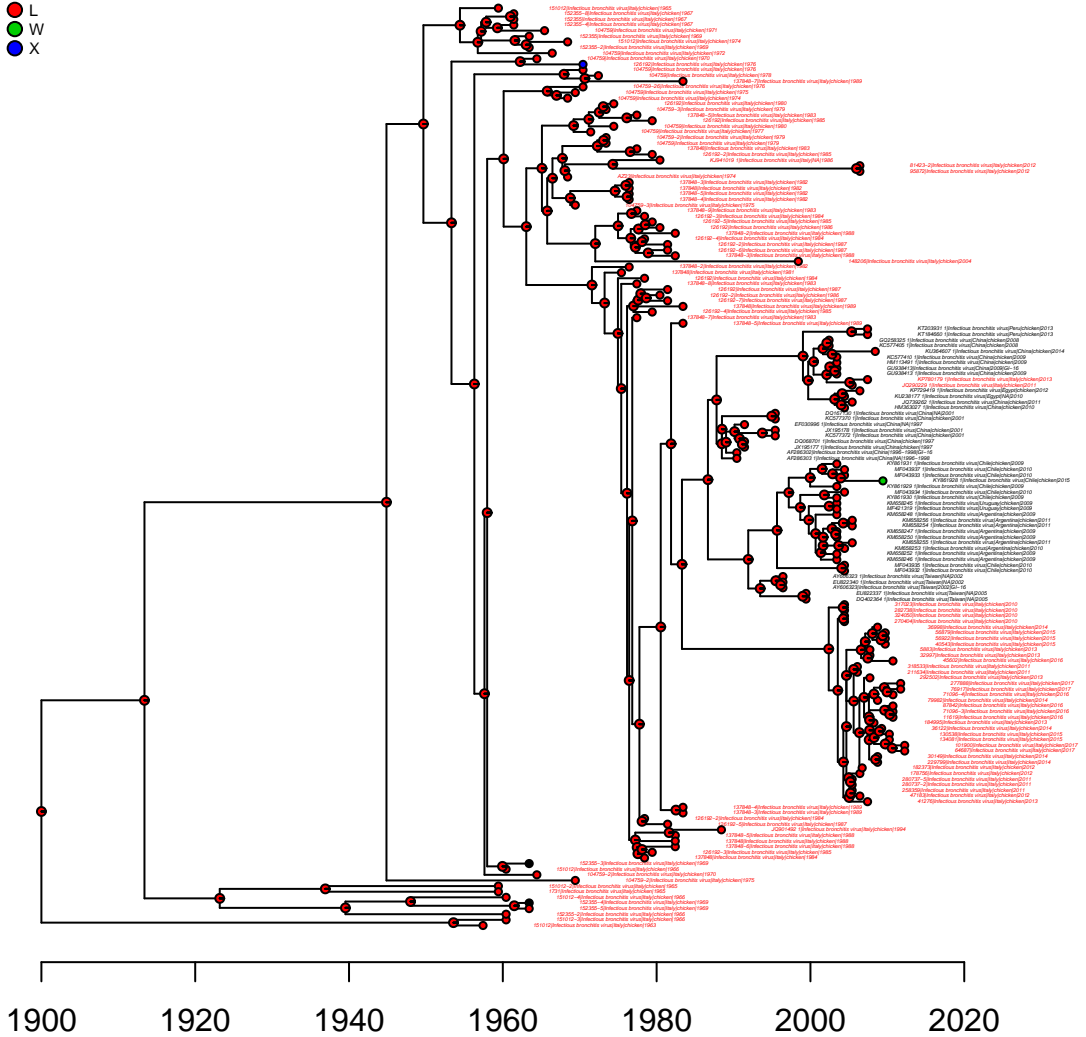

● L  
● W  
● X

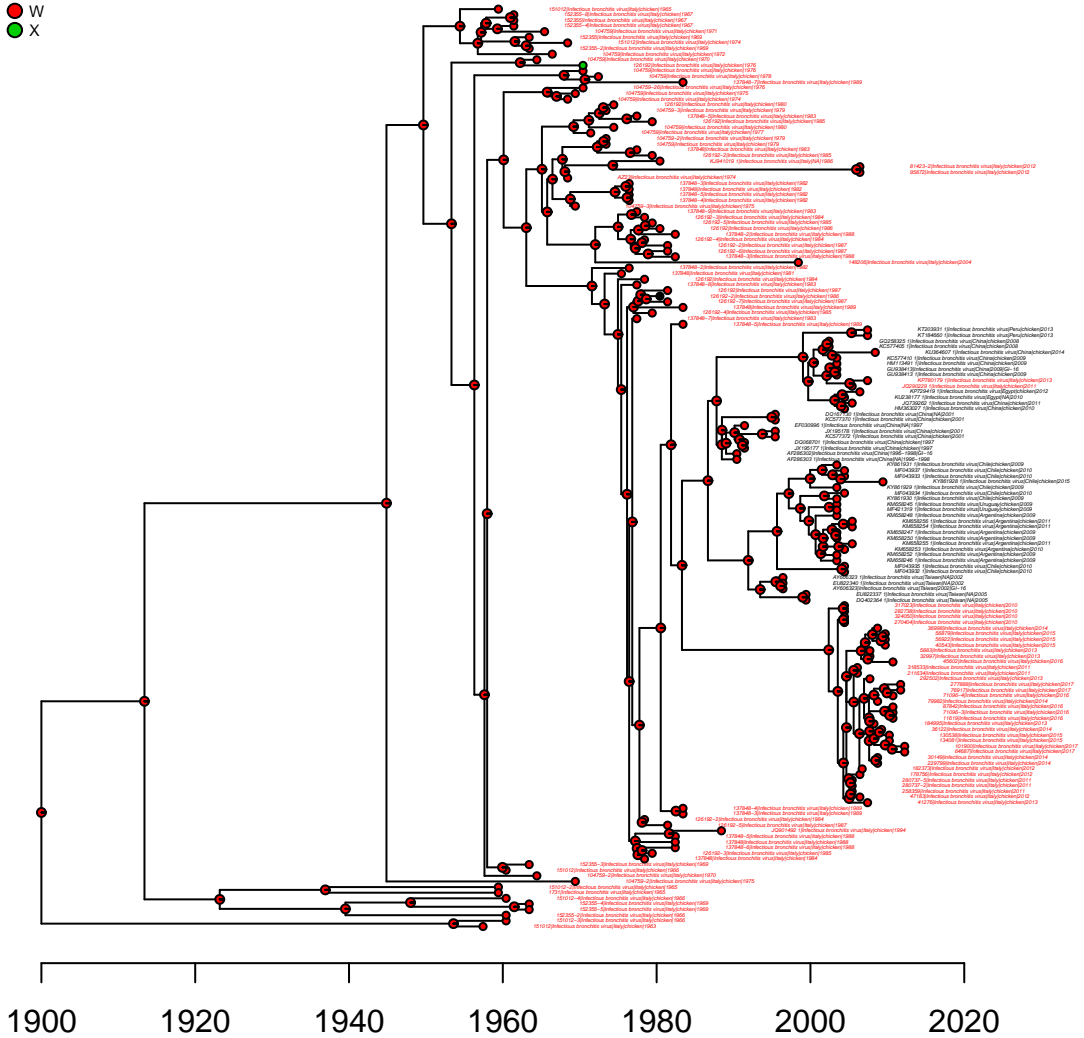



N  
X

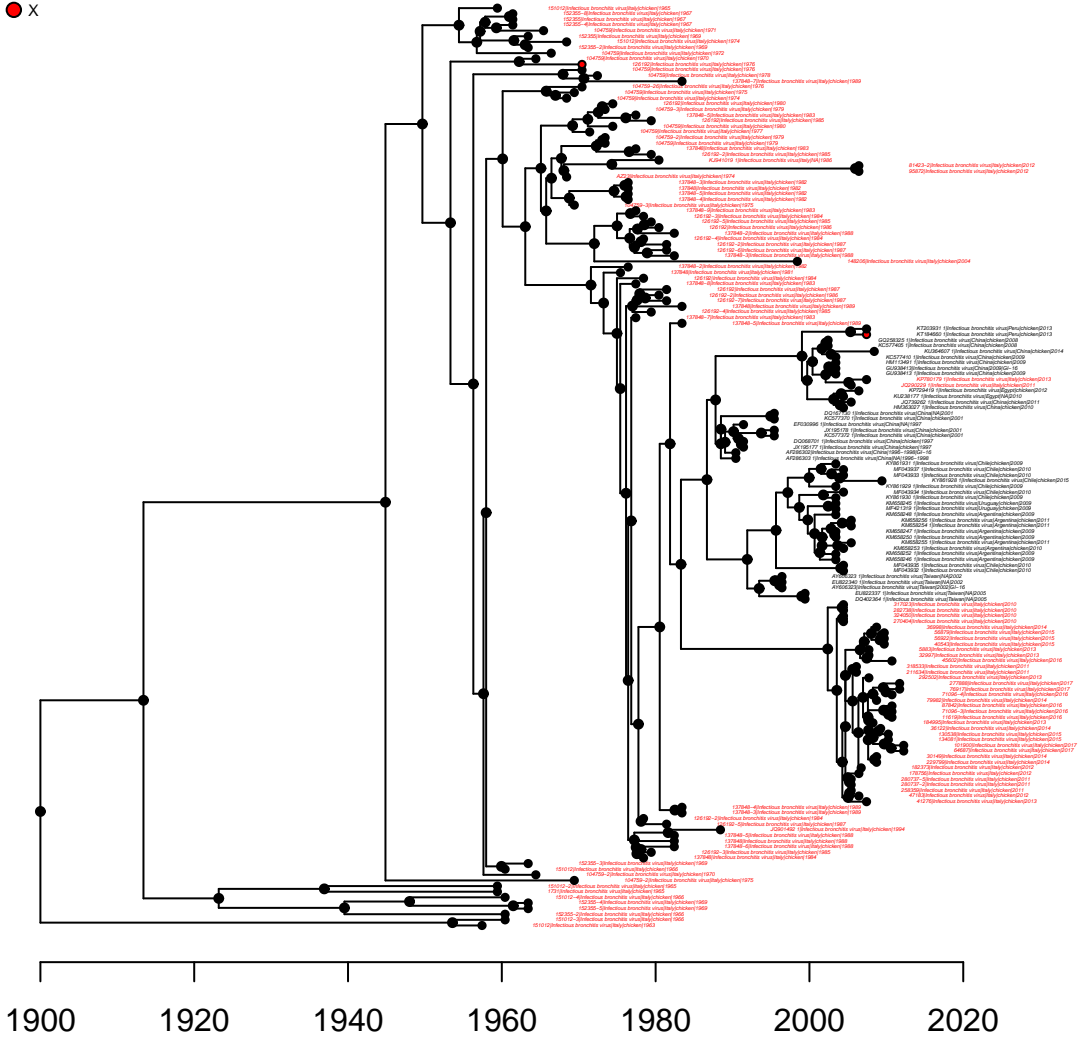

● A  
● S  
● X

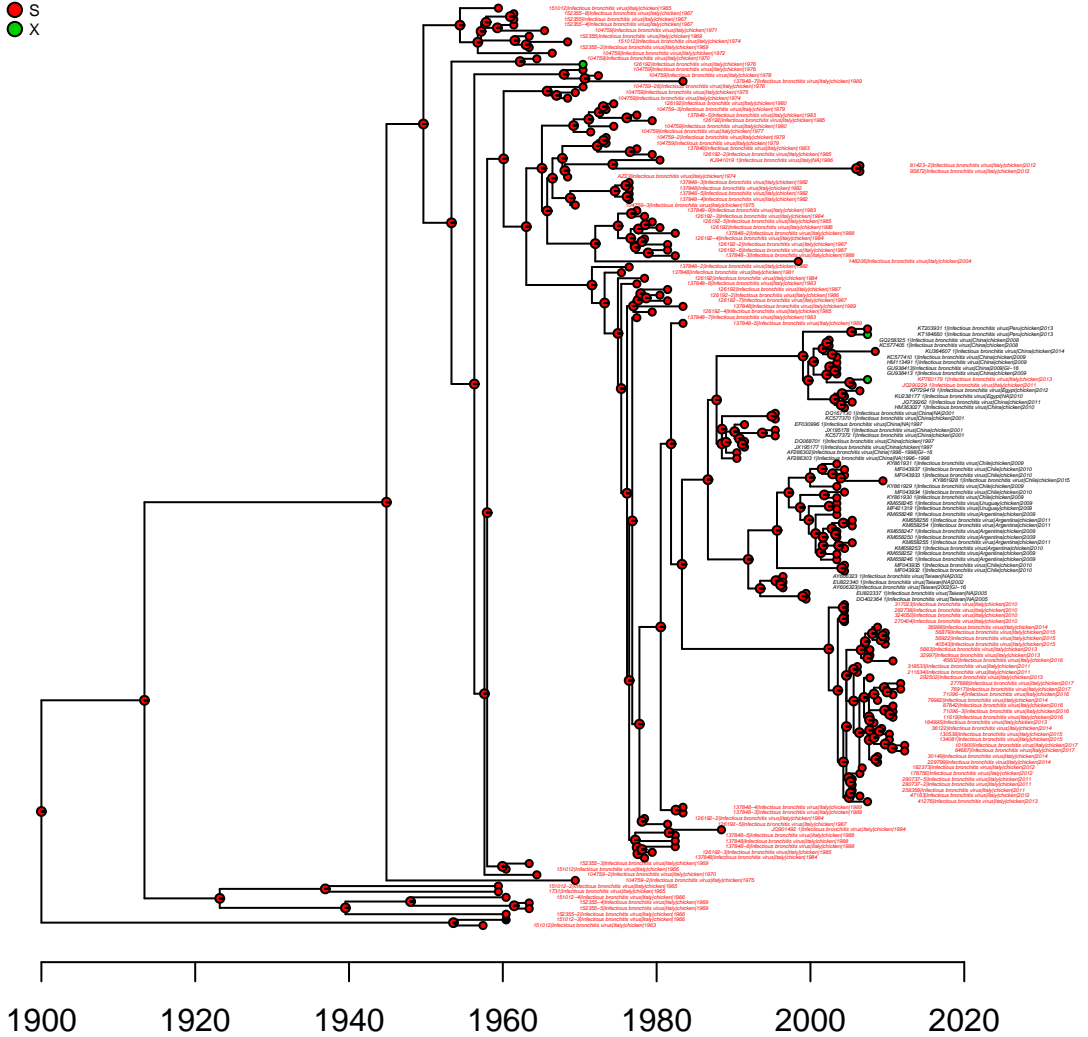











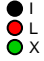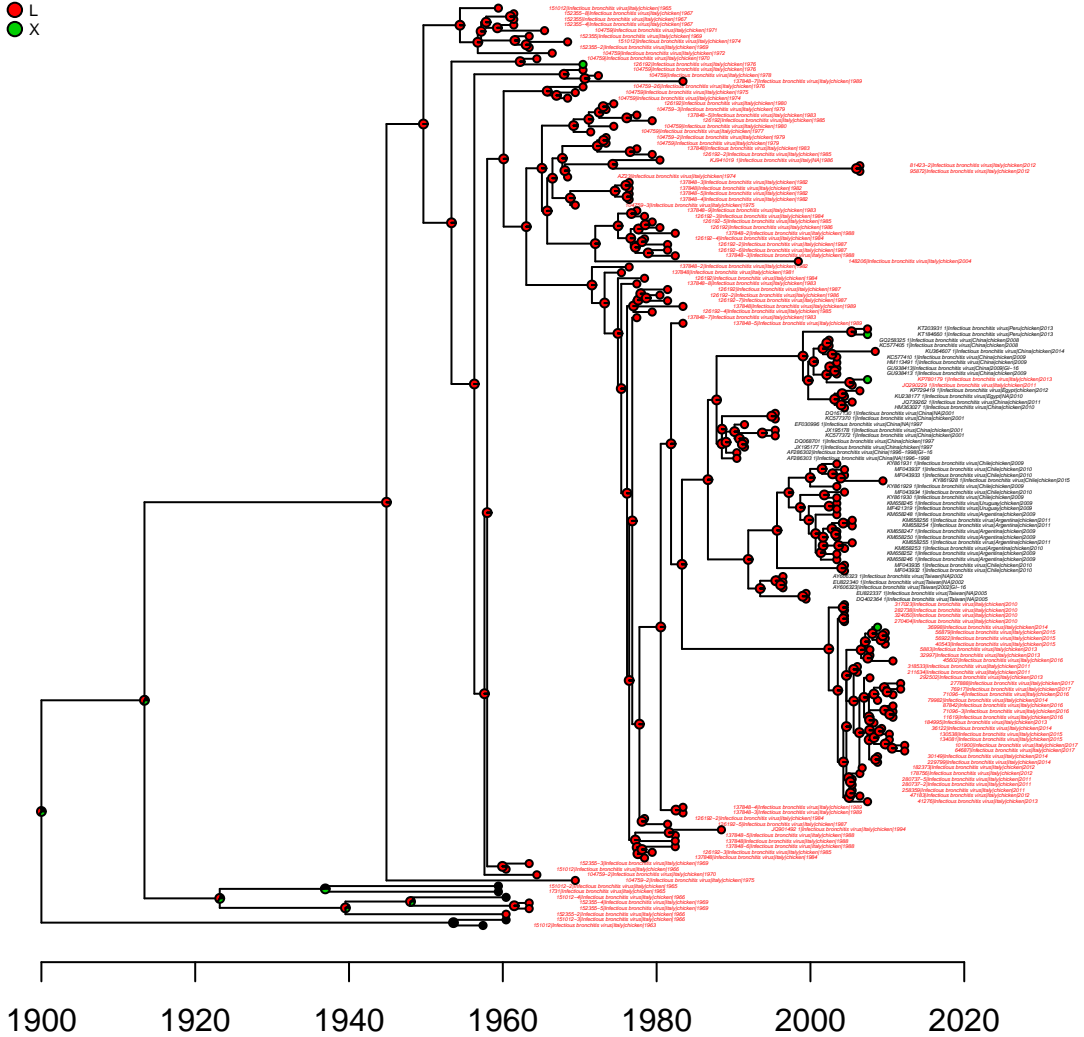

● A  
● G  
● X

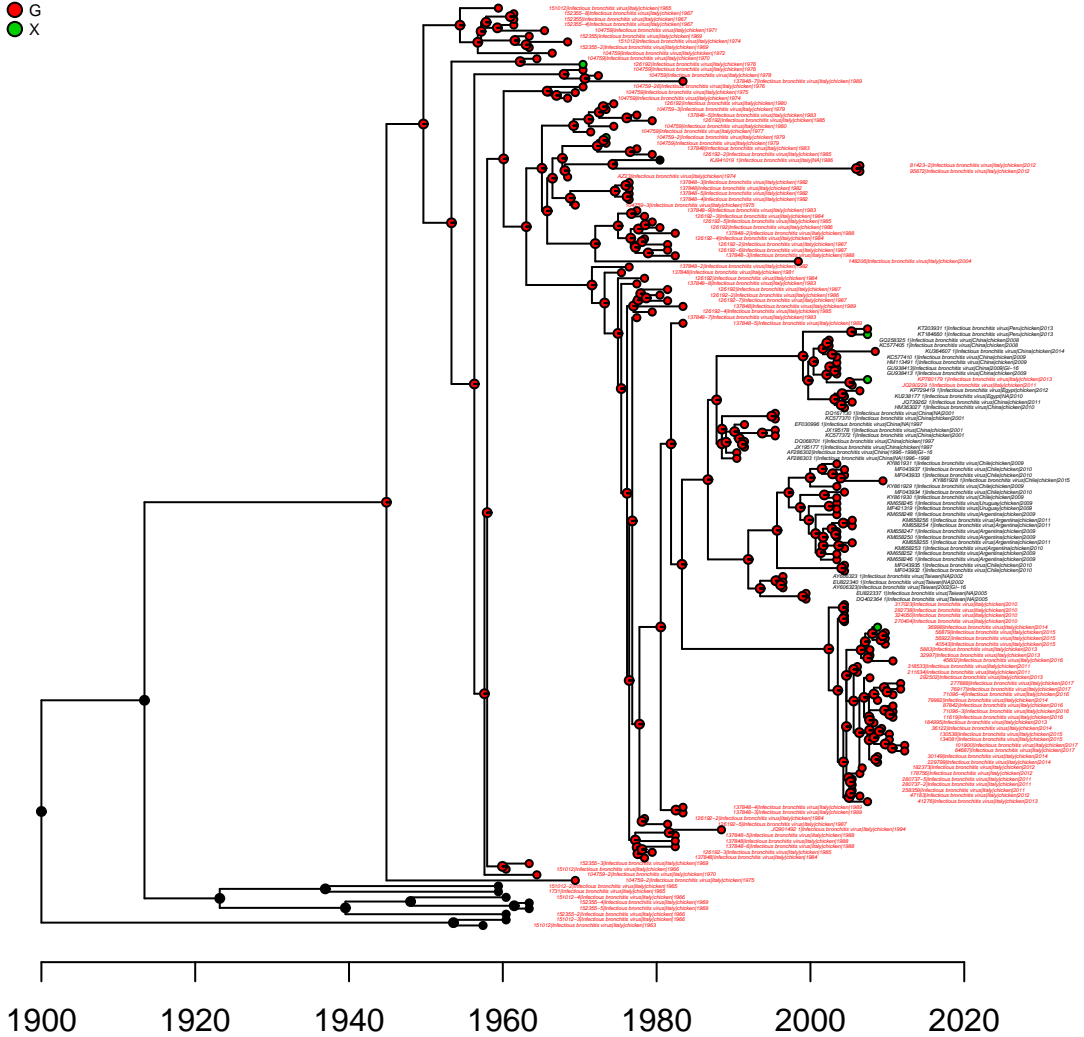

● X  
● Y

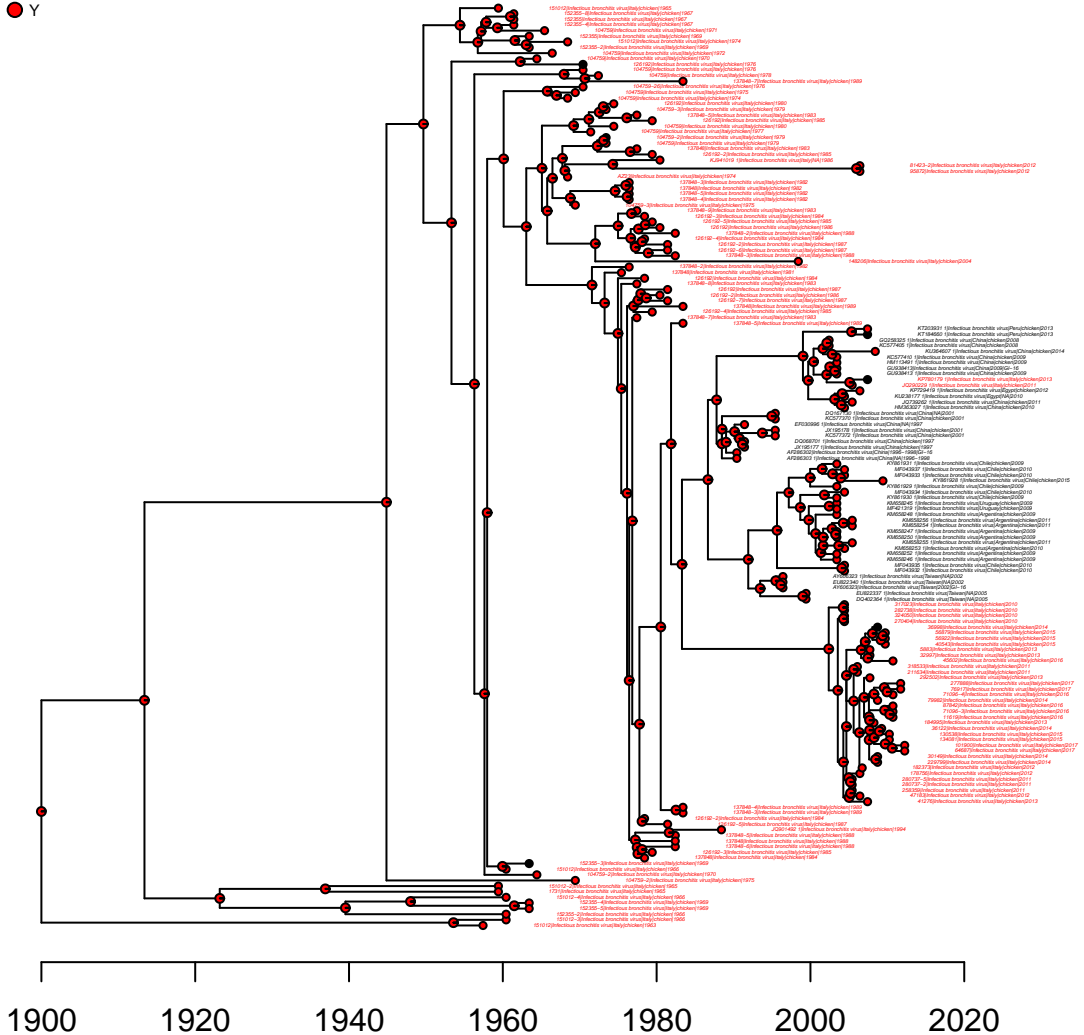







● I  
● L  
● R  
● X

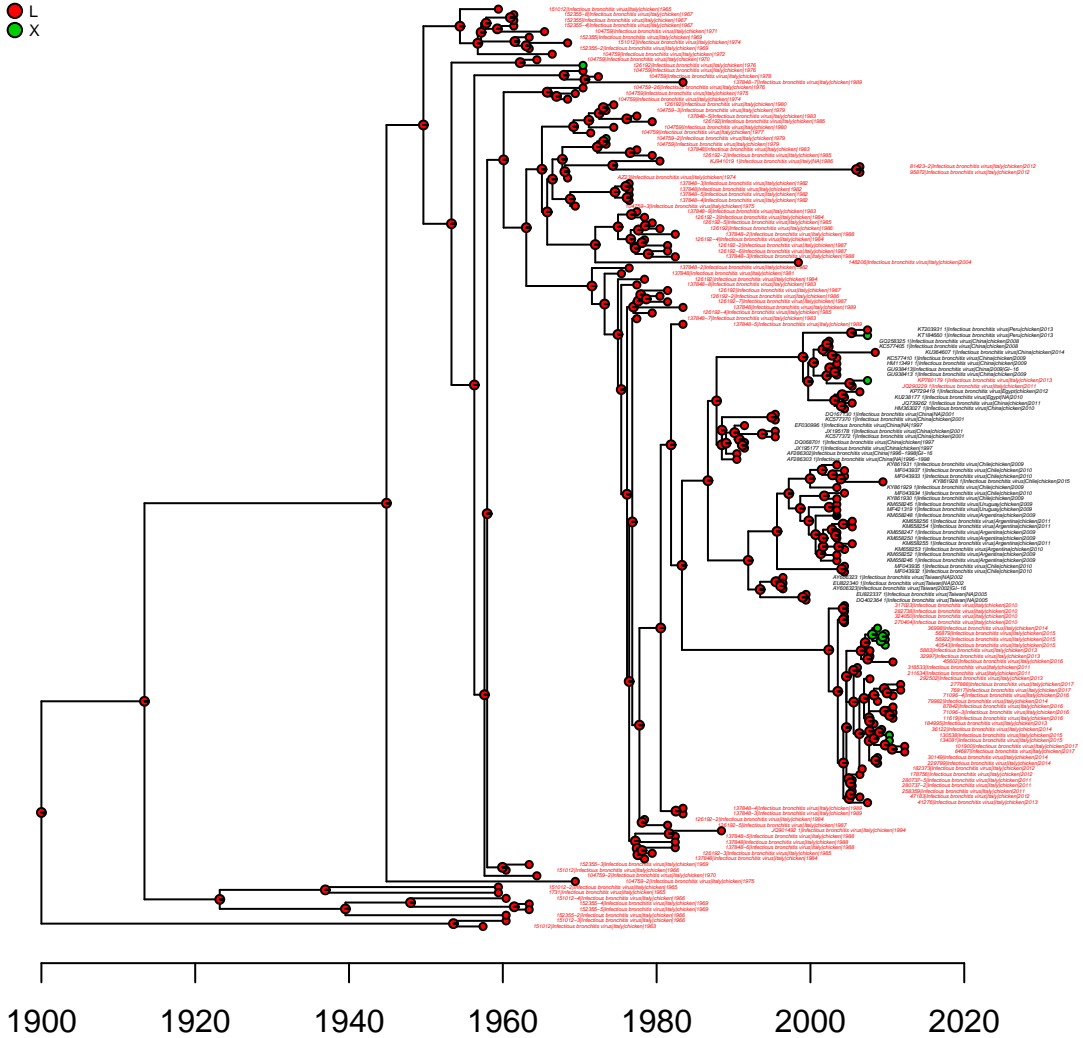





● G  
● X

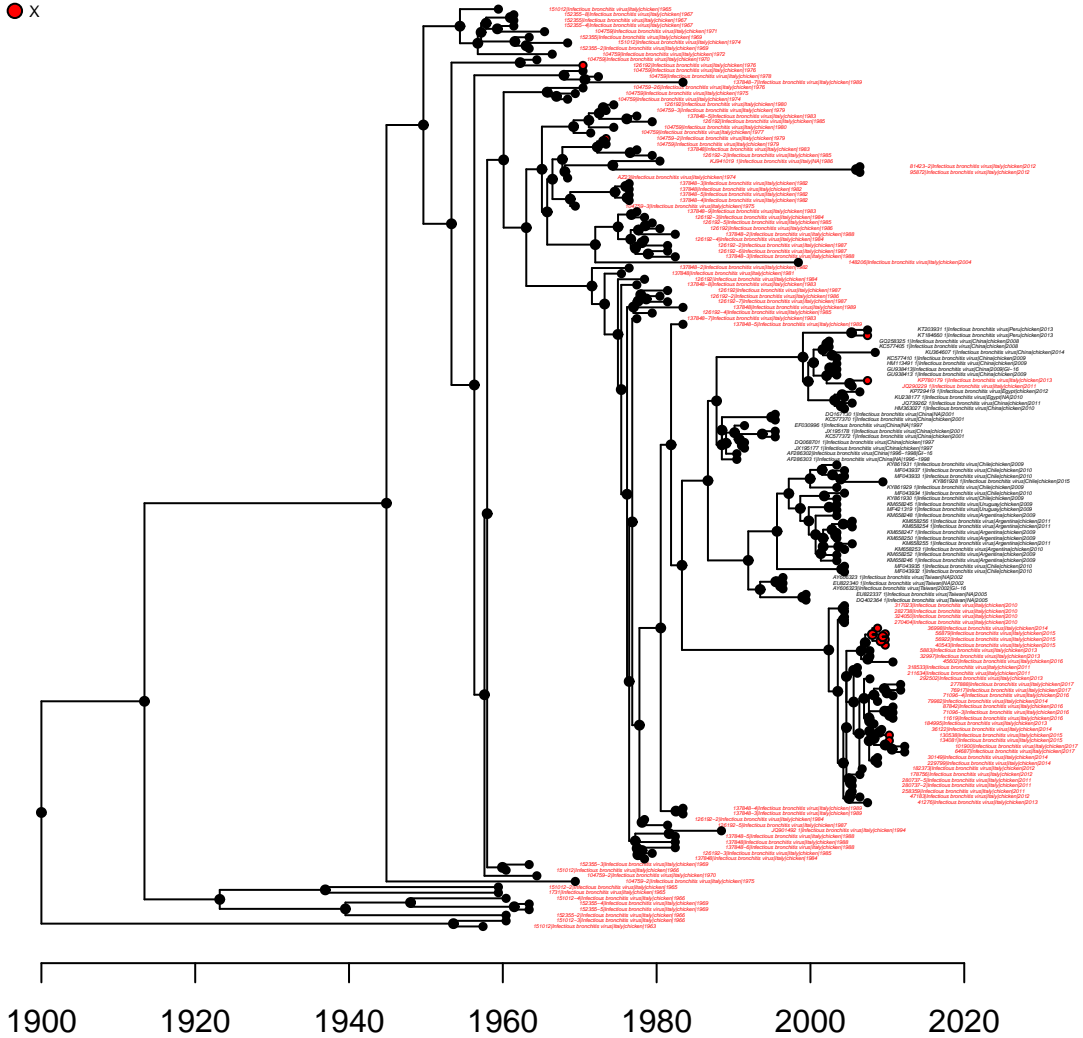

● C  
● X

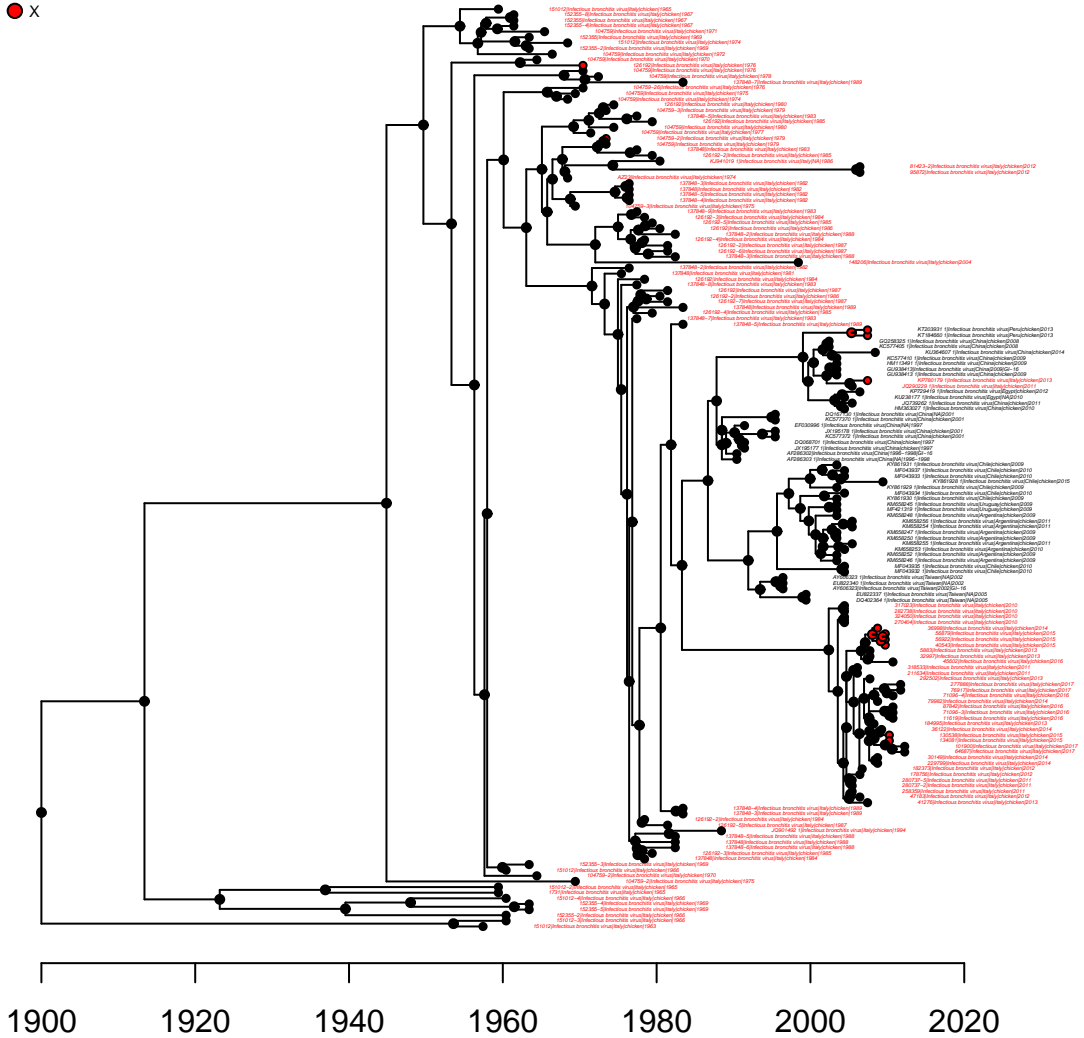

● K  
● X

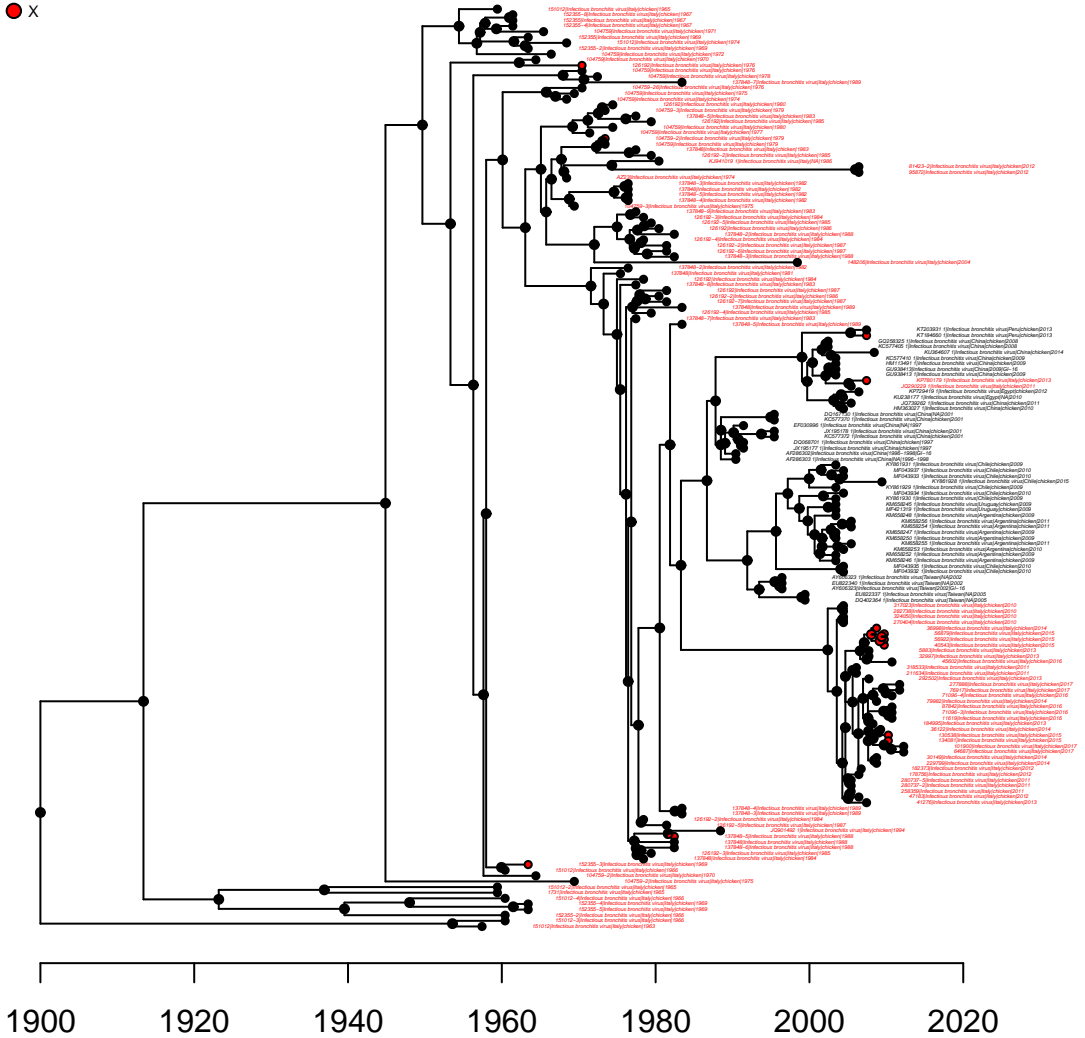



● A  
● F  
● S  
● X

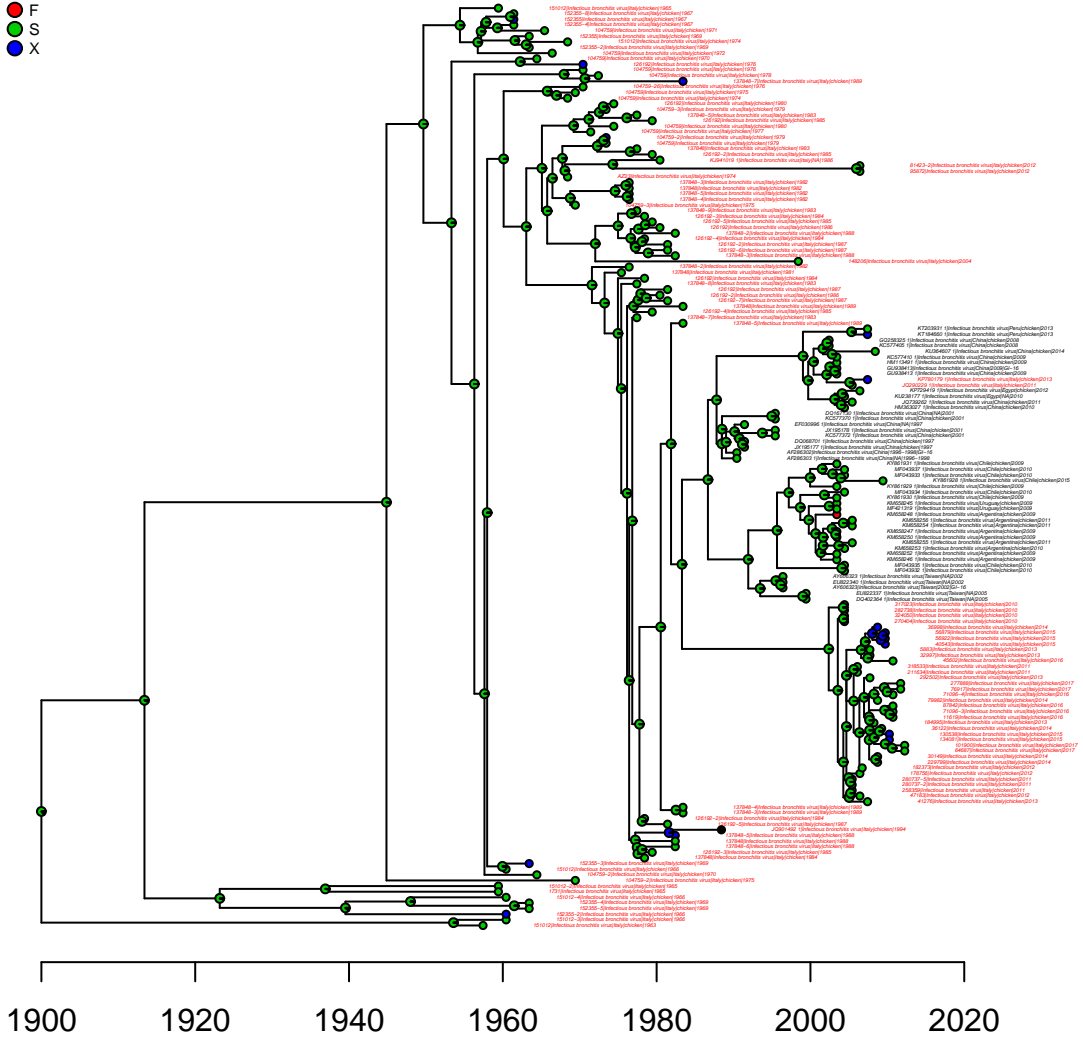

Supplement: pone.0203513.s003.pdf [file pone.0203513.s003.pdf]
