# Supplementary material for: GI-16 lineage (624/I or Q1), there and back again: The history of one of the major threats for poultry farming of our era
Source: PubMed Central journal article supplement (PMC6301571; doi:10.1371/journal.pone.0203513), 2018-12-20
Supplement: pone.0203513.s001.pdf [file pone.0203513.s001.pdf]

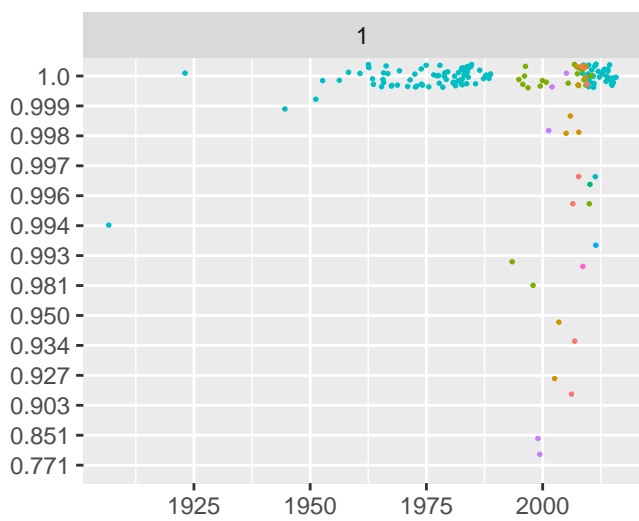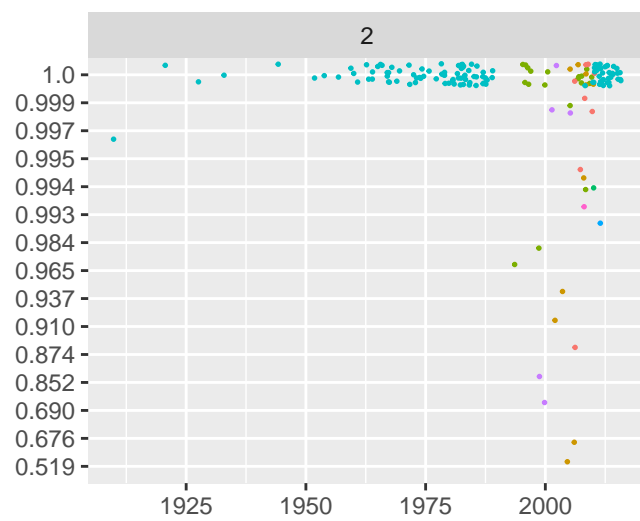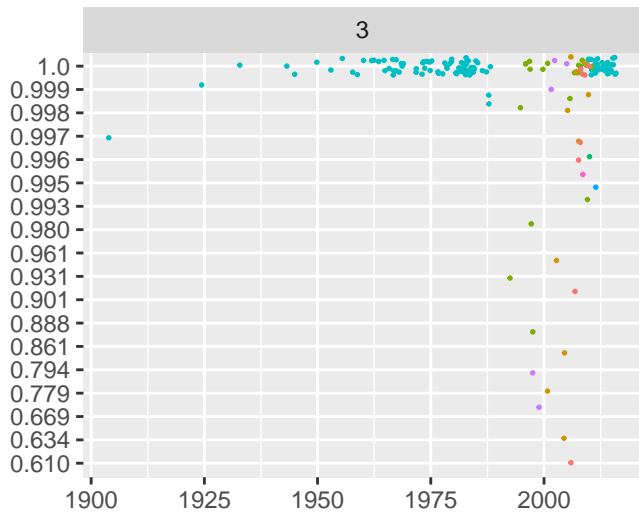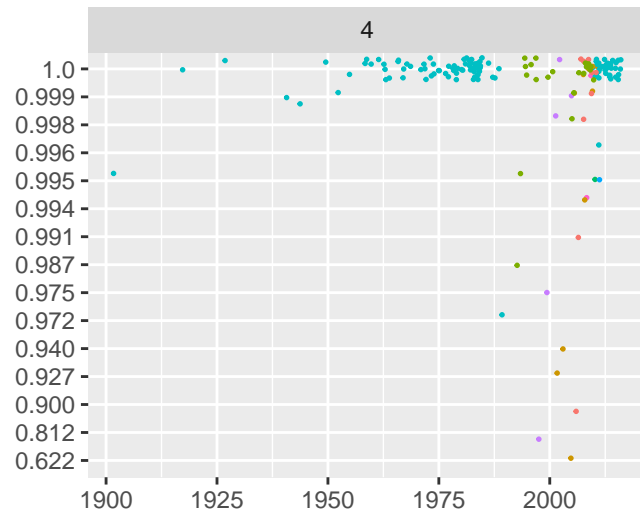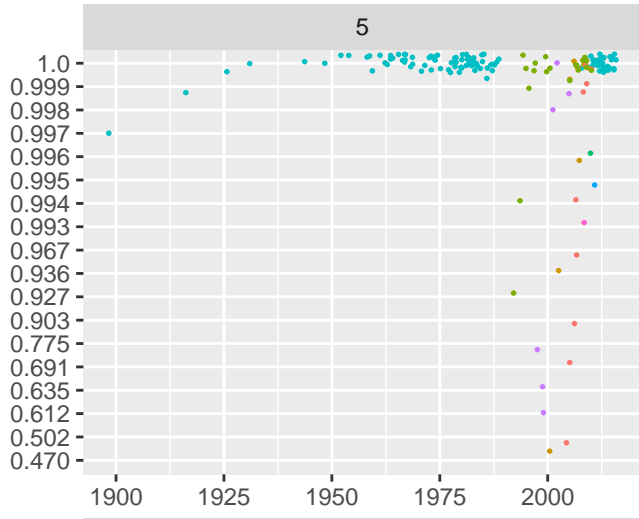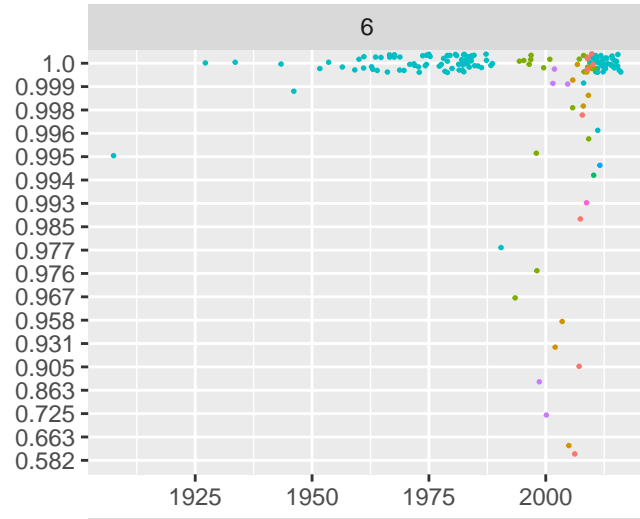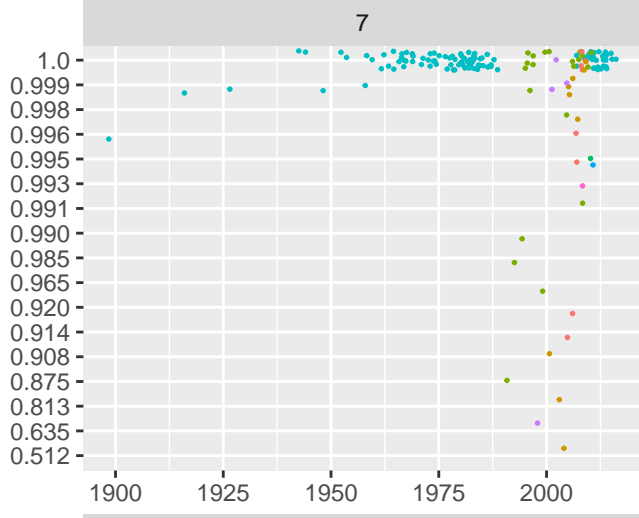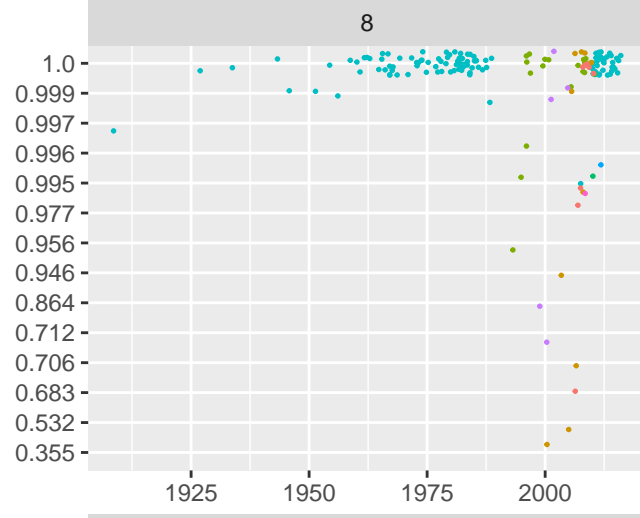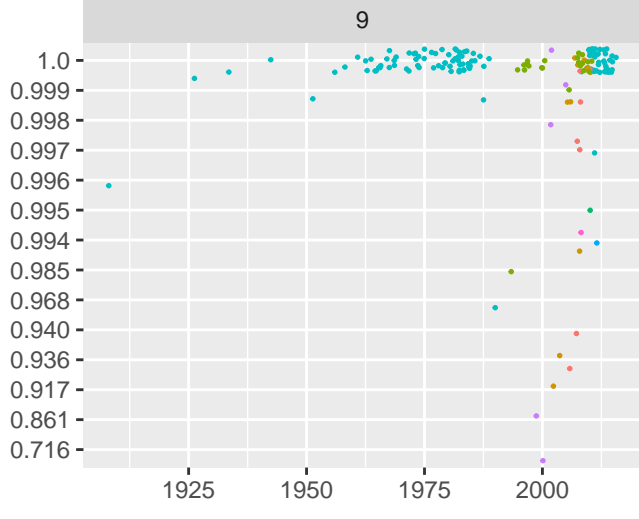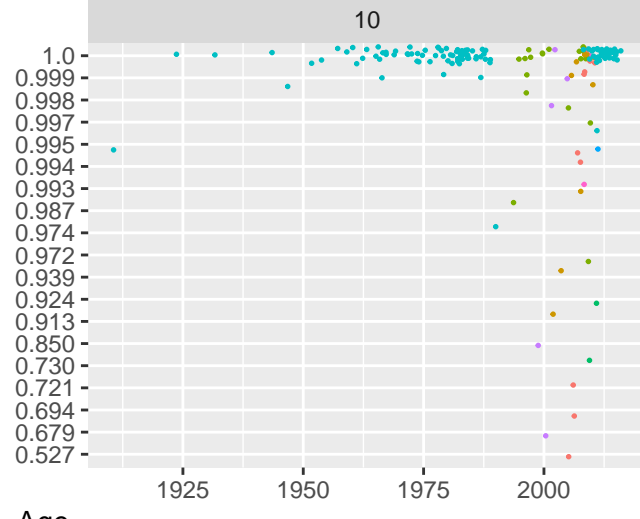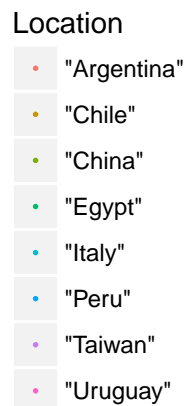

Age

Location.prob2
